# Supplementary material for: microRNA-7-5p inhibits melanoma cell proliferation and metastasis by suppressing RelA/NF-κB
Source: PubMed Central journal article supplement (PMC5077967; doi:10.18632/oncotarget.9421), 2016-05-17
Supplement: oncotarget-07-31663-s002.pdf [file oncotarget-07-31663-s002.pdf]

**Supplementary Table S1: mRNAs upregulated by miR-7-5p in WM266-4 cells.**

| <b>Gene Symbol</b> | <b>Fold Change</b> | <b>p-value</b> |
|--------------------|--------------------|----------------|
| ALDH9A1            | 1.500218           | 2.07E-05       |
| COPS8              | 1.503097           | 1.30E-06       |
| ISCU               | 1.506694           | 6.69E-04       |
| ANKRD46            | 1.50828            | 5.62E-06       |
| CEP135             | 1.508291           | 1.10E-04       |
| HOXA4              | 1.510246           | 7.47E-04       |
| UPF3A              | 1.512464           | 8.13E-05       |
| ISCU               | 1.513847           | 9.47E-04       |
| RP2                | 1.51424            | 3.18E-05       |
| CEP55              | 1.514942           | 4.37E-05       |
| H19                | 1.515252           | 2.90E-04       |
| PPP2R3C            | 1.518449           | 1.15E-05       |
| LCLAT1             | 1.520093           | 1.02E-04       |
| SPECC1L            | 1.520297           | 2.48E-06       |
| ZC3H7A             | 1.521982           | 1.43E-05       |
| OSGIN1             | 1.522811           | 2.21E-03       |
| FLRT3              | 1.523127           | 7.50E-05       |
| WDR54              | 1.523221           | 1.18E-05       |
| TPM1               | 1.523415           | 1.27E-04       |
| HKDC1              | 1.523438           | 4.02E-06       |
| MLX                | 1.525396           | 8.59E-06       |
| MAP4K2             | 1.527159           | 1.08E-04       |
| C20orf20           | 1.527995           | 2.41E-05       |
| ARID5B             | 1.528829           | 1.19E-05       |
| AZIN1              | 1.529535           | 2.53E-05       |
| SLC35B3            | 1.530318           | 6.19E-07       |
| SPC25              | 1.531898           | 2.89E-04       |
| ST6GALNAC2         | 1.533134           | 5.55E-05       |
| NCOA7              | 1.533375           | 3.77E-05       |
| C9orf119           | 1.53531            | 3.85E-04       |
| ARMCX1             | 1.5379             | 3.62E-07       |
| SPA17              | 1.539049           | 1.65E-04       |
| LOC728734          | 1.539261           | 1.96E-04       |
| SEMA4F             | 1.54008            | 1.04E-04       |
| PSMD7              | 1.540935           | 4.06E-06       |
| YTHDC1             | 1.541275           | 2.41E-05       |
| TOR1AIP1           | 1.541968           | 6.15E-05       |
| LLPH               | 1.542103           | 2.17E-03       |
| CFLAR              | 1.542551           | 2.81E-04       |
| HPS5               | 1.542597           | 9.88E-06       |
| TDG                | 1.543517           | 2.13E-04       |
| C9orf123           | 1.544998           | 4.76E-07       |

|          |          |          |
|----------|----------|----------|
| SYNM     | 1.546626 | 6.03E-05 |
| ROD1     | 1.546684 | 1.34E-04 |
| RASSF1   | 1.549014 | 2.57E-05 |
| ZDHHC6   | 1.54923  | 3.41E-05 |
| PSMC3IP  | 1.551684 | 3.01E-05 |
| AMACR    | 1.552848 | 3.67E-07 |
| C15orf17 | 1.553905 | 2.52E-07 |
| PRPSAP1  | 1.554229 | 1.75E-06 |
| H3F3C    | 1.559432 | 1.66E-05 |
| VBP1     | 1.560058 | 7.41E-07 |
| IFT88    | 1.562342 | 1.80E-05 |
| STK19    | 1.562448 | 2.27E-04 |
| TFB1M    | 1.565649 | 1.03E-04 |
| TRIB2    | 1.566082 | 6.66E-06 |
| KATNA1   | 1.568182 | 9.15E-08 |
| LCOR     | 1.568517 | 8.03E-05 |
| DYRK2    | 1.570052 | 1.35E-06 |
| PLDN     | 1.570415 | 3.41E-06 |
| HNRNPR   | 1.570709 | 5.88E-05 |
| SRP72    | 1.57083  | 3.57E-04 |
| PBK      | 1.573062 | 5.44E-05 |
| RNF182   | 1.573443 | 1.02E-04 |
| TGFBR3   | 1.573926 | 1.43E-04 |
| CAB39    | 1.574832 | 1.99E-04 |
| C19orf2  | 1.574964 | 2.20E-06 |
| DICER1   | 1.578885 | 2.58E-05 |
| C5orf28  | 1.579227 | 2.63E-02 |
| CTNNB1   | 1.580038 | 2.02E-04 |
| METAP2   | 1.583897 | 2.15E-05 |
| MZT1     | 1.584257 | 1.40E-05 |
| UBE2T    | 1.585781 | 5.63E-05 |
| LLPH     | 1.592755 | 2.17E-05 |
| DYRK2    | 1.598205 | 9.74E-08 |
| EPHB4    | 1.600823 | 5.95E-05 |
| TBC1D19  | 1.603569 | 2.90E-06 |
| CXorf57  | 1.605502 | 8.79E-06 |
| AGPAT9   | 1.606812 | 2.02E-05 |
| C16orf87 | 1.610061 | 2.82E-05 |
| ERBB3    | 1.610985 | 2.56E-05 |
| C16orf48 | 1.611555 | 8.65E-06 |
| ZSWIM7   | 1.611841 | 1.36E-04 |
| EML4     | 1.614678 | 1.23E-04 |
| PJA1     | 1.61592  | 8.91E-07 |
| VHL      | 1.619558 | 2.34E-07 |

|          |          |          |
|----------|----------|----------|
| BRCC3    | 1.621528 | 4.80E-07 |
| TBC1D9   | 1.62296  | 1.83E-05 |
| RNF14    | 1.622999 | 2.14E-07 |
| CKAP2    | 1.623241 | 7.88E-06 |
| DNAL4    | 1.623447 | 2.23E-06 |
| SYTL2    | 1.623611 | 1.81E-05 |
| MAD2L1   | 1.624925 | 5.79E-05 |
| IGF2BP3  | 1.625163 | 1.98E-05 |
| POU3F2   | 1.630748 | 1.54E-05 |
| MRPL19   | 1.63188  | 1.64E-05 |
| UBE2V1   | 1.632748 | 1.16E-06 |
| PIAS2    | 1.63639  | 4.80E-07 |
| C1GALT1  | 1.638292 | 4.31E-06 |
| CYR61    | 1.64336  | 9.52E-06 |
| ITGA4    | 1.643627 | 5.57E-04 |
| TJP1     | 1.644941 | 1.51E-05 |
| PSMC3IP  | 1.646208 | 2.14E-05 |
| UBE2E3   | 1.650177 | 3.14E-04 |
| KIF14    | 1.651298 | 5.47E-06 |
| TBC1D4   | 1.652608 | 7.40E-05 |
| SPECC1L  | 1.65455  | 8.10E-07 |
| ACLY     | 1.657267 | 2.41E-04 |
| UBE2Q2   | 1.66003  | 5.37E-05 |
| NEIL3    | 1.66018  | 7.57E-06 |
| POU3F2   | 1.660236 | 2.68E-07 |
| GPR180   | 1.660663 | 3.44E-05 |
| NEK2     | 1.664477 | 6.19E-04 |
| HMGB2    | 1.66638  | 1.47E-05 |
| CLUAP1   | 1.667334 | 6.21E-08 |
| SRI      | 1.66778  | 8.13E-07 |
| ADAM17   | 1.670951 | 1.52E-04 |
| PDIA5    | 1.673457 | 3.46E-06 |
| MAGEA12  | 1.673977 | 8.93E-05 |
| RASSF1   | 1.676928 | 2.77E-07 |
| CDC42SE2 | 1.676936 | 1.23E-05 |
| HNRNPM   | 1.678083 | 2.00E-07 |
| GALC     | 1.679366 | 5.58E-05 |
| PSMC3IP  | 1.685947 | 1.34E-07 |
| SENP2    | 1.686179 | 1.73E-05 |
| HMGB2    | 1.686339 | 1.02E-04 |
| CDKN2D   | 1.691843 | 1.04E-05 |
| DENND5B  | 1.693054 | 3.59E-06 |
| CRIP1    | 1.700795 | 4.35E-05 |
| ANGPTL4  | 1.702901 | 1.26E-07 |

|          |          |          |
|----------|----------|----------|
| TOR1AIP1 | 1.704871 | 5.51E-06 |
| ARL6IP6  | 1.706671 | 1.53E-05 |
| CAV2     | 1.707681 | 7.40E-06 |
| ACLY     | 1.710438 | 7.79E-05 |
| HNRNPH2  | 1.710962 | 5.12E-06 |
| CTNNB1   | 1.711193 | 2.84E-04 |
| MTAP     | 1.71555  | 2.56E-08 |
| CPOX     | 1.719113 | 2.76E-05 |
| SMTN     | 1.719812 | 1.58E-03 |
| HIRIP3   | 1.721586 | 1.35E-04 |
| SYPL1    | 1.723553 | 3.22E-05 |
| BIRC5    | 1.723713 | 4.77E-06 |
| GPN1     | 1.734028 | 8.37E-08 |
| LCOR     | 1.737932 | 8.35E-08 |
| KIFAP3   | 1.743649 | 1.62E-05 |
| SENP2    | 1.743702 | 1.89E-06 |
| SRA1     | 1.749729 | 6.84E-06 |
| MMP1     | 1.750538 | 3.51E-05 |
| MACF1    | 1.755997 | 3.19E-06 |
| GPR19    | 1.756073 | 9.48E-06 |
| NDUFA6   | 1.75812  | 9.60E-06 |
| CNIH4    | 1.75874  | 3.46E-05 |
| CP110    | 1.765468 | 2.49E-07 |
| CDK14    | 1.766438 | 5.03E-06 |
| IMPA1    | 1.767822 | 1.45E-04 |
| ETF1     | 1.769518 | 8.17E-07 |
| FBXO33   | 1.778737 | 2.88E-05 |
| HMGCS1   | 1.780099 | 8.76E-04 |
| RSL24D1  | 1.780442 | 5.90E-07 |
| HNRNPM   | 1.780499 | 1.03E-05 |
| TJP1     | 1.785846 | 4.76E-06 |
| RRM2     | 1.792213 | 2.06E-04 |
| HCCS     | 1.813681 | 5.84E-06 |
| RNF14    | 1.814703 | 1.52E-04 |
| SCML1    | 1.819322 | 5.82E-06 |
| SYTL2    | 1.826395 | 3.07E-07 |
| PPM1B    | 1.835744 | 2.32E-06 |
| GAL3ST4  | 1.846842 | 2.86E-08 |
| NT5E     | 1.847701 | 6.23E-06 |
| PAG1     | 1.847728 | 5.32E-08 |
| HNRNPM   | 1.848594 | 7.84E-06 |
| HNRNPR   | 1.855392 | 8.85E-07 |
| ODF2L    | 1.856864 | 8.03E-08 |
| AIDA     | 1.861889 | 1.39E-04 |

|           |          |          |
|-----------|----------|----------|
| MAP2K1    | 1.865599 | 1.37E-06 |
| SRI       | 1.869579 | 3.34E-08 |
| IDI1      | 1.874999 | 3.87E-06 |
| GXYLT1    | 1.880626 | 1.04E-06 |
| ITGA6     | 1.881398 | 3.51E-05 |
| SRI       | 1.881615 | 2.82E-08 |
| PMM1      | 1.884533 | 3.02E-07 |
| ETF1      | 1.901352 | 6.69E-07 |
| CAV2      | 1.907688 | 2.29E-07 |
| NUP35     | 1.920402 | 1.45E-07 |
| HNRNPR    | 1.930669 | 1.13E-06 |
| PROSC     | 1.93308  | 7.86E-07 |
| EIF2S1    | 1.939538 | 8.60E-06 |
| ATPAF1    | 1.945914 | 8.19E-07 |
| CTGF      | 1.948971 | 4.65E-05 |
| C7orf42   | 1.952727 | 2.24E-05 |
| BTG3      | 1.961712 | 3.50E-07 |
| VKORC1L1  | 1.962747 | 1.90E-08 |
| CKAP2     | 1.981484 | 6.56E-05 |
| SLC35A1   | 1.994111 | 2.32E-07 |
| RHOB      | 2.003638 | 1.21E-06 |
| TXNDC5    | 2.007702 | 3.44E-05 |
| MAGEA12   | 2.016249 | 2.74E-08 |
| PITHD1    | 2.022927 | 3.28E-09 |
| ARPC4     | 2.02656  | 5.94E-08 |
| ARPC4     | 2.030432 | 6.47E-06 |
| RIT1      | 2.039858 | 5.33E-06 |
| C12orf76  | 2.043936 | 1.18E-08 |
| MAPK1IP1L | 2.060014 | 5.43E-08 |
| RDH11     | 2.062459 | 1.24E-06 |
| IKBIP     | 2.068561 | 1.28E-05 |
| ARMCX1    | 2.071935 | 3.25E-06 |
| FECH      | 2.072688 | 7.44E-07 |
| YWHAG     | 2.078332 | 3.51E-07 |
| ANGPTL4   | 2.098909 | 3.57E-06 |
| C5orf15   | 2.119844 | 5.31E-06 |
| RTCD1     | 2.126101 | 1.30E-08 |
| GNA13     | 2.12914  | 6.45E-06 |
| RHPN2     | 2.138565 | 3.21E-09 |
| GNB1      | 2.142676 | 8.27E-08 |
| RTCD1     | 2.156772 | 9.97E-07 |
| YWHAG     | 2.165631 | 5.60E-08 |
| RAB11FIP1 | 2.195026 | 4.67E-06 |
| PNMA1     | 2.204723 | 7.93E-08 |

|          |          |          |
|----------|----------|----------|
| C5orf51  | 2.225137 | 1.16E-07 |
| C5orf51  | 2.238236 | 1.12E-06 |
| RDH11    | 2.246545 | 4.78E-06 |
| RDX      | 2.251674 | 4.59E-06 |
| NUP35    | 2.305793 | 4.67E-08 |
| SLC2A3   | 2.321157 | 9.45E-07 |
| SYT11    | 2.341349 | 8.84E-06 |
| C12orf76 | 2.351214 | 1.33E-09 |
| NARF     | 2.355279 | 1.21E-07 |
| CTGF     | 2.383213 | 1.17E-05 |
| NPTN     | 2.423185 | 2.48E-08 |
| COMMD10  | 2.442951 | 2.59E-09 |
| ICMT     | 2.529495 | 7.74E-08 |
| NPTN     | 2.54421  | 1.65E-07 |
| RAB8B    | 2.547302 | 8.78E-07 |
| SCML1    | 2.561286 | 9.37E-08 |
| BTG3     | 2.622336 | 3.92E-07 |
| CYBRD1   | 2.623774 | 4.31E-07 |
| SNRPC    | 2.704316 | 4.97E-08 |
| CAV2     | 2.71329  | 9.33E-10 |
| COMMD10  | 2.78941  | 3.03E-08 |
| CYBRD1   | 2.958742 | 1.05E-08 |
| SNRPC    | 3.217349 | 2.83E-09 |
| TMEM2    | 3.74921  | 5.24E-08 |
