# Supplementary material for: microRNA-7-5p inhibits melanoma cell proliferation and metastasis by suppressing RelA/NF-κB
Source: PubMed Central journal article supplement (PMC5077967; doi:10.18632/oncotarget.9421), 2016-05-17
Supplement: oncotarget-07-31663-s003.pdf [file oncotarget-07-31663-s003.pdf]

**Supplementary Table S2: mRNAs downregulated by miR-7-5p in WM266-4 cells.**

| <b>Gene Symbol</b> | <b>Fold Change</b> | <b>p-value</b> |
|--------------------|--------------------|----------------|
| POLE4              | -6.86147           | 1.77E-09       |
| CRTAP              | -6.72923           | 1.23E-09       |
| CTSK               | -6.27368           | 3.57E-11       |
| PSME3              | -5.86241           | 4.52E-09       |
| PSME3              | -5.80604           | 1.44E-10       |
| POLE3              | -4.63569           | 1.24E-11       |
| CKAP4              | -4.22576           | 1.72E-09       |
| LITAF              | -4.12253           | 4.75E-08       |
| C18orf10           | -3.95152           | 6.94E-10       |
| TMEM158            | -3.91059           | 1.16E-09       |
| ACO2               | -3.75155           | 1.28E-07       |
| C18orf10           | -3.73459           | 7.53E-08       |
| TMEM43             | -3.68198           | 3.70E-08       |
| SMARCD1            | -3.59651           | 7.90E-08       |
| BCL2L12            | -3.54424           | 2.05E-08       |
| CNRIP1             | -3.54388           | 6.91E-09       |
| SCARB2             | -3.52772           | 1.25E-10       |
| GLO1               | -3.50827           | 9.73E-09       |
| LBH                | -3.4838            | 1.46E-08       |
| DYM                | -3.46537           | 2.52E-08       |
| DHCR24             | -3.46082           | 5.40E-07       |
| BCL2L12            | -3.45895           | 2.40E-05       |
| TMEM97             | -3.43507           | 1.21E-08       |
| DAZAP2             | -3.33766           | 1.13E-09       |
| RUSC1              | -3.26108           | 9.68E-09       |
| AGK                | -3.18013           | 3.17E-10       |
| VPS26A             | -3.11009           | 3.40E-08       |
| RRP7A              | -3.09954           | 1.15E-09       |
| RCC2               | -3.05653           | 3.24E-08       |
| EIF2S3             | -3.0527            | 1.19E-08       |
| UBQLN4             | -3.02856           | 3.27E-09       |
| SLC35A4            | -2.99728           | 1.78E-07       |
| ZDHHC9             | -2.99471           | 2.75E-09       |
| TSEN34             | -2.96632           | 3.71E-09       |
| TIMP3              | -2.95049           | 9.18E-07       |
| TMED9              | -2.91086           | 2.46E-09       |
| ARMC10             | -2.9025            | 3.32E-09       |
| RNF181             | -2.87154           | 1.67E-07       |
| CNN3               | -2.86512           | 2.41E-08       |
| AUP1               | -2.84888           | 3.62E-08       |
| PIGH               | -2.84378           | 4.67E-09       |

|          |          |          |
|----------|----------|----------|
| SLC39A3  | -2.82561 | 1.01E-06 |
| FAM46C   | -2.81157 | 1.65E-07 |
| CALM3    | -2.80305 | 1.73E-09 |
| EHD1     | -2.79865 | 1.20E-07 |
| MGLL     | -2.79167 | 8.25E-09 |
| CYBASC3  | -2.75985 | 2.81E-07 |
| SKP1     | -2.75531 | 6.98E-08 |
| ARSB     | -2.74111 | 5.74E-07 |
| TMED10   | -2.74096 | 1.51E-06 |
| C1orf198 | -2.72783 | 5.64E-07 |
| SIGMAR1  | -2.71809 | 1.43E-06 |
| TGOLN2   | -2.70253 | 3.21E-08 |
| NDUFA4   | -2.68953 | 1.36E-09 |
| AKR7A2   | -2.66653 | 2.92E-08 |
| GAD1     | -2.6631  | 3.84E-08 |
| MFSD10   | -2.66304 | 4.53E-07 |
| SLC25A15 | -2.6517  | 7.15E-08 |
| OLFML2A  | -2.65125 | 1.66E-09 |
| SLC9A1   | -2.64893 | 1.26E-08 |
| NR1H2    | -2.6485  | 9.36E-08 |
| PI15     | -2.64268 | 2.96E-08 |
| CITED4   | -2.64189 | 9.93E-07 |
| GRINA    | -2.62131 | 1.96E-06 |
| HIATL1   | -2.61088 | 7.85E-07 |
| ELK1     | -2.60808 | 9.44E-09 |
| AKR7A3   | -2.60688 | 4.24E-10 |
| GAS7     | -2.60066 | 2.08E-08 |
| SHISA5   | -2.59383 | 5.60E-06 |
| RAF1     | -2.59379 | 1.77E-07 |
| SEPW1    | -2.58376 | 9.84E-08 |
| RNF144A  | -2.58116 | 6.07E-09 |
| SUPT4H1  | -2.5771  | 4.06E-08 |
| RNF144A  | -2.55689 | 1.85E-08 |
| XPR1     | -2.5476  | 3.54E-07 |
| UBE3C    | -2.54192 | 5.29E-07 |
| SIRPA    | -2.53249 | 7.71E-09 |
| UBE3C    | -2.522   | 1.94E-07 |
| PIK3R2   | -2.51883 | 4.09E-06 |
| MGLL     | -2.47964 | 2.44E-09 |
| CTDSP2   | -2.45749 | 7.07E-09 |
| XPR1     | -2.45535 | 1.39E-07 |
| ATP1B3   | -2.44044 | 7.30E-07 |
| C20orf4  | -2.43756 | 4.31E-07 |
| SPATS1   | -2.43372 | 2.30E-07 |

|          |          |          |
|----------|----------|----------|
| ZYX      | -2.43112 | 2.39E-07 |
| NBL1     | -2.43032 | 1.86E-05 |
| MFSD5    | -2.42972 | 2.67E-07 |
| ZMIZ1    | -2.42806 | 5.54E-07 |
| TSEN34   | -2.41153 | 9.78E-07 |
| GLS      | -2.41055 | 7.69E-09 |
| KPNA6    | -2.40658 | 1.10E-04 |
| SIGMAR1  | -2.39271 | 1.24E-08 |
| SIGMAR1  | -2.3832  | 9.01E-06 |
| RNF114   | -2.38309 | 1.17E-09 |
| NUDCD3   | -2.37332 | 3.84E-07 |
| EIF2AK1  | -2.36616 | 3.74E-08 |
| PQLC1    | -2.35822 | 4.37E-08 |
| CNRIP1   | -2.35037 | 4.63E-09 |
| TRIML2   | -2.34907 | 4.26E-08 |
| MX2      | -2.34319 | 4.11E-07 |
| PATL1    | -2.33737 | 5.62E-08 |
| PAQR4    | -2.33507 | 8.77E-07 |
| CTDSPL   | -2.32824 | 1.84E-07 |
| ZNF395   | -2.32656 | 3.03E-06 |
| ZYX      | -2.31123 | 2.13E-06 |
| PRMT2    | -2.30951 | 4.20E-07 |
| RAB5B    | -2.29708 | 7.10E-06 |
| GRINA    | -2.29654 | 4.05E-06 |
| STX5     | -2.28576 | 2.42E-07 |
| NBL1     | -2.28499 | 1.25E-06 |
| SNAP29   | -2.2837  | 3.21E-08 |
| TMEM179B | -2.27629 | 6.44E-07 |
| AP3M1    | -2.2756  | 1.77E-06 |
| TRPV2    | -2.27067 | 1.72E-08 |
| COMMD7   | -2.26953 | 5.68E-08 |
| C20orf24 | -2.26711 | 2.78E-08 |
| SDC4     | -2.26114 | 8.45E-09 |
| RNF5     | -2.26109 | 4.82E-09 |
| TRIM8    | -2.25988 | 2.91E-08 |
| YWHAB    | -2.25424 | 8.29E-09 |
| EPB41L3  | -2.25205 | 3.87E-07 |
| AMMECR1  | -2.24772 | 3.39E-09 |
| PI15     | -2.24393 | 6.07E-07 |
| NPTX1    | -2.2429  | 3.98E-05 |
| PIGH     | -2.23916 | 5.09E-08 |
| TMEM179B | -2.22362 | 6.93E-08 |
| VGLL4    | -2.19766 | 2.15E-05 |
| GHDC     | -2.19513 | 2.27E-05 |

|          |          |          |
|----------|----------|----------|
| DCAF7    | -2.18965 | 9.80E-06 |
| CRTAP    | -2.17854 | 6.68E-06 |
| PDXDC1   | -2.16828 | 1.14E-06 |
| DCAF12   | -2.16117 | 3.18E-07 |
| C3orf21  | -2.13698 | 1.75E-06 |
| CMTM7    | -2.1353  | 4.05E-07 |
| UBE2D4   | -2.13236 | 1.12E-07 |
| SLC25A39 | -2.12009 | 1.35E-08 |
| GPM6B    | -2.10705 | 1.17E-09 |
| UBAP1    | -2.10512 | 3.92E-08 |
| RPL22    | -2.09881 | 1.39E-08 |
| HMGH4    | -2.09842 | 8.83E-09 |
| ADPRHL2  | -2.09192 | 5.66E-06 |
| PHF16    | -2.08892 | 8.22E-06 |
| RHBDF2   | -2.08673 | 4.10E-08 |
| PFN2     | -2.07903 | 5.43E-07 |
| TTL12    | -2.07556 | 1.15E-06 |
| FAM82A2  | -2.0731  | 4.73E-06 |
| AP3M1    | -2.07087 | 1.19E-06 |
| TMEM69   | -2.06916 | 3.05E-07 |
| FAM89B   | -2.06271 | 3.87E-07 |
| CAV1     | -2.06251 | 6.65E-06 |
| ZNF828   | -2.06112 | 1.01E-06 |
| HPCAL1   | -2.05848 | 2.72E-08 |
| PLAGL2   | -2.05494 | 5.74E-08 |
| PRMT2    | -2.05467 | 2.34E-06 |
| PLOD1    | -2.0525  | 8.63E-08 |
| TSGA14   | -2.05024 | 2.89E-08 |
| DNAJC15  | -2.04867 | 9.28E-08 |
| SRF      | -2.04806 | 2.84E-07 |
| RNF114   | -2.04264 | 1.85E-08 |
| SLC6A10P | -2.03875 | 1.42E-05 |
| PAK2     | -2.03627 | 1.59E-07 |
| RNF38    | -2.0338  | 2.34E-07 |
| SLC2A10  | -2.03324 | 5.18E-06 |
| IDE      | -2.03255 | 2.88E-08 |
| RPL15    | -2.02949 | 1.33E-07 |
| UHRF1    | -2.02905 | 4.49E-08 |
| HSPA5    | -2.02291 | 2.39E-07 |
| ALG3     | -2.02064 | 8.10E-06 |
| CDC37    | -2.01885 | 1.39E-07 |
| SKP1     | -2.01245 | 2.16E-08 |
| L1CAM    | -2.01032 | 1.86E-03 |
| ILF3     | -2.00983 | 9.56E-06 |

|           |          |          |
|-----------|----------|----------|
| OSBP      | -2.00549 | 5.75E-07 |
| STK32B    | -2.00303 | 3.48E-07 |
| RNF5P1    | -2.00144 | 7.48E-08 |
| SIGMAR1   | -1.99852 | 2.56E-07 |
| TMEM150A  | -1.99794 | 1.19E-05 |
| LPCAT1    | -1.99516 | 6.86E-07 |
| TMEM14C   | -1.9919  | 5.02E-07 |
| PLEC      | -1.98866 | 1.09E-04 |
| NHLRC3    | -1.98444 | 2.94E-08 |
| GAD1      | -1.98415 | 5.04E-08 |
| UBE2J1    | -1.98034 | 1.46E-06 |
| WBP2      | -1.97874 | 3.64E-06 |
| GPAA1     | -1.97835 | 2.11E-07 |
| COL1A2    | -1.97392 | 1.30E-05 |
| TYRO3     | -1.97152 | 8.04E-07 |
| SLC39A3   | -1.95474 | 1.09E-06 |
| BCKDK     | -1.95005 | 2.40E-07 |
| NDFIP2    | -1.94969 | 1.09E-06 |
| SPNS1     | -1.94906 | 4.18E-06 |
| SPIRE1    | -1.9485  | 1.45E-07 |
| PIP4K2C   | -1.94656 | 1.83E-08 |
| DHCR7     | -1.94189 | 1.66E-07 |
| PLXNA1    | -1.93956 | 1.75E-06 |
| TRIM25    | -1.93817 | 3.03E-07 |
| CYB5R2    | -1.93669 | 2.31E-06 |
| SCAP      | -1.93494 | 3.37E-06 |
| CNO       | -1.93445 | 1.45E-07 |
| STMN3     | -1.92818 | 7.02E-06 |
| SNCA      | -1.92713 | 5.90E-07 |
| TSPAN10   | -1.92395 | 5.53E-06 |
| SLC25A23  | -1.92228 | 1.51E-05 |
| ENO2      | -1.91874 | 9.02E-07 |
| ADO       | -1.91801 | 2.70E-08 |
| TMEM14C   | -1.91443 | 1.85E-07 |
| PPP1R11   | -1.91201 | 8.08E-08 |
| ARHGAP1   | -1.9061  | 5.37E-07 |
| SLC35A5   | -1.90128 | 3.09E-06 |
| TBCD      | -1.90055 | 3.62E-05 |
| LOC653506 | -1.90009 | 3.11E-08 |
| EIF2B3    | -1.89909 | 2.02E-07 |
| ARF4      | -1.89706 | 7.33E-07 |
| RIPK4     | -1.89689 | 5.53E-06 |
| C10orf90  | -1.89426 | 8.55E-06 |
| ITPKB     | -1.88975 | 6.20E-05 |

|          |          |          |
|----------|----------|----------|
| ORAI1    | -1.88899 | 5.04E-08 |
| TBC1D2B  | -1.88793 | 2.38E-06 |
| FRMD8    | -1.8848  | 7.56E-09 |
| LANCL1   | -1.8818  | 1.37E-05 |
| CISD2    | -1.8814  | 2.53E-07 |
| GNA12    | -1.87671 | 2.43E-08 |
| TM9SF1   | -1.87497 | 2.45E-07 |
| PCLO     | -1.87427 | 2.03E-05 |
| MT1X     | -1.874   | 3.93E-06 |
| C10orf57 | -1.87099 | 1.04E-07 |
| APLP2    | -1.86994 | 1.13E-06 |
| CMTM7    | -1.86466 | 3.49E-06 |
| NCEH1    | -1.86427 | 1.18E-07 |
| GALE     | -1.86327 | 3.97E-07 |
| PSRC1    | -1.86285 | 3.55E-08 |
| UBXN2B   | -1.85738 | 3.23E-07 |
| CHEK1    | -1.8558  | 1.89E-07 |
| SLC43A3  | -1.85504 | 1.36E-04 |
| ATF5     | -1.85439 | 1.13E-05 |
| ATP9A    | -1.85407 | 3.53E-06 |
| MMACHC   | -1.85256 | 1.33E-04 |
| PRKRIR   | -1.8483  | 8.47E-05 |
| NOL6     | -1.84551 | 7.41E-06 |
| SDHC     | -1.84467 | 1.42E-06 |
| IGSF3    | -1.84177 | 8.03E-06 |
| TCF12    | -1.84146 | 3.73E-06 |
| TGM2     | -1.84016 | 1.88E-05 |
| MPDU1    | -1.83706 | 2.23E-05 |
| TMEM93   | -1.83536 | 4.41E-06 |
| PDXK     | -1.83458 | 1.10E-06 |
| TOMM40L  | -1.82312 | 2.25E-07 |
| PEX19    | -1.82255 | 2.12E-06 |
| SEPT2    | -1.82233 | 2.44E-05 |
| SLC43A3  | -1.81694 | 6.41E-06 |
| EMX2     | -1.81644 | 1.33E-06 |
| PIK3CB   | -1.81484 | 1.54E-05 |
| ACSL4    | -1.81207 | 1.13E-04 |
| SH3BP4   | -1.81188 | 1.58E-07 |
| AMMECR1  | -1.81055 | 7.82E-07 |
| PHC2     | -1.80913 | 1.09E-05 |
| TMEM134  | -1.80816 | 1.85E-07 |
| UBE2Z    | -1.80613 | 2.65E-06 |
| PURB     | -1.80278 | 1.17E-07 |
| PRIC285  | -1.80263 | 2.37E-05 |

|          |          |          |
|----------|----------|----------|
| LANCL1   | -1.80227 | 1.27E-06 |
| MLLT6    | -1.80046 | 9.99E-07 |
| RPS19BP1 | -1.79869 | 6.16E-05 |
| VDAC1    | -1.79826 | 1.19E-05 |
| STX5     | -1.79804 | 9.42E-06 |
| MPDU1    | -1.79795 | 1.55E-06 |
| C12orf49 | -1.79658 | 1.83E-07 |
| C1orf21  | -1.79355 | 9.71E-07 |
| CBL      | -1.79148 | 5.70E-07 |
| NPAS1    | -1.79079 | 2.12E-07 |
| SIRPA    | -1.78832 | 4.46E-06 |
| TRIB1    | -1.78824 | 6.92E-05 |
| UBE2N    | -1.78736 | 3.52E-07 |
| MRPL10   | -1.78685 | 8.68E-06 |
| CMTM7    | -1.78622 | 3.10E-07 |
| SEL1L3   | -1.78292 | 2.28E-06 |
| EXTL3    | -1.78276 | 2.61E-06 |
| BCL9     | -1.78237 | 3.24E-07 |
| ZBTB4    | -1.78049 | 6.12E-05 |
| HYAL2    | -1.77792 | 2.12E-05 |
| EFHD1    | -1.77762 | 9.14E-08 |
| TUSC2    | -1.77725 | 2.91E-08 |
| ST6GAL1  | -1.77626 | 7.38E-06 |
| SRSF4    | -1.77609 | 4.05E-06 |
| C15orf57 | -1.77486 | 7.00E-08 |
| NOTCH2   | -1.7724  | 1.60E-05 |
| SLC35C2  | -1.77234 | 1.32E-06 |
| SNCA     | -1.7723  | 2.01E-08 |
| PRR7     | -1.76951 | 1.54E-05 |
| ARSB     | -1.76909 | 6.46E-08 |
| BMP8B    | -1.76458 | 1.90E-05 |
| CNRIP1   | -1.76436 | 8.03E-08 |
| IGSF3    | -1.76104 | 1.53E-07 |
| SLC25A19 | -1.7579  | 2.78E-06 |
| NIF3L1   | -1.75389 | 9.92E-08 |
| C20orf24 | -1.74956 | 1.26E-05 |
| SLC27A1  | -1.74487 | 1.16E-03 |
| GPR56    | -1.74422 | 8.95E-05 |
| ANKS1A   | -1.74329 | 1.16E-04 |
| TCF12    | -1.74313 | 1.93E-05 |
| TOMM6    | -1.74253 | 6.01E-05 |
| TMEM134  | -1.74136 | 3.14E-06 |
| GPR56    | -1.74135 | 1.16E-05 |
| CMTM8    | -1.74079 | 4.84E-05 |

|          |          |          |
|----------|----------|----------|
| ACSS1    | -1.73947 | 9.15E-08 |
| SNORA61  | -1.73695 | 5.14E-05 |
| PDE7B    | -1.73154 | 1.28E-05 |
| CD99L2   | -1.72939 | 5.85E-07 |
| GTF2E2   | -1.72782 | 3.88E-06 |
| EGR3     | -1.7267  | 1.20E-07 |
| SRM      | -1.72659 | 1.71E-07 |
| PRICKLE4 | -1.72482 | 4.46E-05 |
| TMEM184B | -1.72266 | 2.00E-04 |
| WASF2    | -1.72239 | 6.54E-04 |
| FLOT2    | -1.72218 | 4.06E-07 |
| TMED10P1 | -1.71981 | 9.69E-07 |
| RGS4     | -1.7183  | 3.06E-07 |
| HECTD3   | -1.71695 | 5.81E-06 |
| SETD8    | -1.71599 | 4.50E-06 |
| SEPT2    | -1.71594 | 3.94E-06 |
| CAV1     | -1.7158  | 5.25E-06 |
| KCTD12   | -1.71436 | 1.55E-05 |
| SLC44A1  | -1.7142  | 1.63E-05 |
| CRTC3    | -1.71174 | 1.81E-06 |
| C9orf78  | -1.71115 | 3.51E-05 |
| DOLK     | -1.71022 | 5.01E-05 |
| ITPRIPL2 | -1.70979 | 8.25E-06 |
| SSU72    | -1.70875 | 3.64E-06 |
| PTK2     | -1.70658 | 1.95E-06 |
| C1orf85  | -1.70489 | 2.24E-06 |
| TROVE2   | -1.70464 | 8.61E-07 |
| TMEM93   | -1.70359 | 9.15E-06 |
| GREB1    | -1.70339 | 8.15E-07 |
| C3orf39  | -1.7003  | 1.24E-04 |
| ETV4     | -1.70022 | 2.93E-05 |
| TSGA14   | -1.69661 | 5.25E-07 |
| ADAM19   | -1.69537 | 3.91E-05 |
| DHX33    | -1.69484 | 8.25E-05 |
| FBXO2    | -1.69133 | 2.24E-04 |
| TSKU     | -1.68646 | 5.56E-06 |
| MAZ      | -1.68517 | 2.05E-03 |
| PSEN2    | -1.68466 | 1.16E-06 |
| DHCR7    | -1.68155 | 1.49E-06 |
| BRWD1    | -1.67904 | 1.78E-04 |
| ADCY9    | -1.67843 | 3.05E-05 |
| SERF2    | -1.67485 | 7.08E-08 |
| SLC25A15 | -1.67321 | 2.16E-06 |
| DENND4B  | -1.67187 | 3.18E-05 |



|           |          |          |
|-----------|----------|----------|
| CALU      | -1.67016 | 1.61E-05 |
| MRAP2     | -1.66881 | 1.43E-06 |
| FYCO1     | -1.66779 | 6.18E-07 |
| ZNF275    | -1.6667  | 5.56E-06 |
| ATP2C1    | -1.66573 | 2.71E-06 |
| C11orf24  | -1.66361 | 1.95E-05 |
| CASP2     | -1.66308 | 2.41E-07 |
| RNF40     | -1.6627  | 8.20E-05 |
| FAM203B   | -1.66252 | 4.69E-07 |
| SRGAP2    | -1.6616  | 4.79E-05 |
| EXOSC2    | -1.66022 | 3.05E-06 |
| DCT       | -1.65898 | 9.87E-06 |
| C20orf177 | -1.6575  | 9.62E-07 |
| FGF13     | -1.65606 | 2.15E-06 |
| PIGS      | -1.65576 | 4.44E-07 |
| VPS26A    | -1.65175 | 3.06E-06 |
| HRK       | -1.65054 | 1.59E-04 |
| TAPBP     | -1.64762 | 1.69E-04 |
| WDR4      | -1.64667 | 1.20E-05 |
| STOM      | -1.64594 | 4.86E-06 |
| GNPTAB    | -1.64205 | 1.29E-05 |
| COG2      | -1.64129 | 2.68E-05 |
| USP39     | -1.63965 | 4.40E-07 |
| MICALL1   | -1.63616 | 4.34E-06 |
| RHBDF2    | -1.63603 | 2.52E-07 |
| CBLB      | -1.63545 | 1.34E-06 |
| NPRL3     | -1.6354  | 7.11E-05 |
| SRGAP2    | -1.63296 | 2.23E-05 |
| CANT1     | -1.63268 | 9.28E-04 |
| C20orf24  | -1.6325  | 1.26E-06 |
| VPS4A     | -1.63174 | 1.65E-05 |
| PAK1      | -1.63141 | 1.74E-06 |
| SH2B3     | -1.63138 | 2.55E-04 |
| TTYH3     | -1.631   | 2.73E-05 |
| TMEM214   | -1.63007 | 7.31E-04 |
| NEU1      | -1.63002 | 1.08E-05 |
| CAPZA1    | -1.62994 | 5.68E-06 |
| FBXL18    | -1.62905 | 6.61E-06 |
| SLC35C2   | -1.62756 | 1.98E-07 |
| SPRY1     | -1.62729 | 1.28E-05 |
| PGAP2     | -1.62713 | 7.92E-07 |
| SLC6A15   | -1.62695 | 4.47E-07 |
| GOLGA7B   | -1.62596 | 6.78E-07 |
| ACTR3     | -1.62359 | 7.43E-05 |

|           |          |          |
|-----------|----------|----------|
| AGPAT1    | -1.62349 | 1.25E-03 |
| CAMK2D    | -1.62272 | 1.01E-06 |
| JOSD1     | -1.62184 | 1.65E-06 |
| CNOT8     | -1.62172 | 8.64E-07 |
| TBC1D13   | -1.62122 | 3.60E-06 |
| AVPI1     | -1.62119 | 5.36E-08 |
| PLK4      | -1.61961 | 1.21E-04 |
| DPYSL2    | -1.6196  | 1.55E-06 |
| HSPBP1    | -1.61828 | 1.49E-05 |
| MAFG      | -1.61711 | 7.47E-05 |
| TMEM219   | -1.61655 | 2.52E-06 |
| RAB11FIP5 | -1.6159  | 5.67E-07 |
| NPTX1     | -1.61583 | 8.36E-04 |
| ATG7      | -1.6151  | 3.68E-05 |
| ST8SIA5   | -1.61494 | 6.72E-05 |
| OXSR1     | -1.61463 | 1.16E-05 |
| KIAA0114  | -1.61283 | 2.65E-04 |
| AIF1L     | -1.6128  | 2.86E-07 |
| RYK       | -1.61194 | 1.87E-06 |
| C1QTNF6   | -1.61183 | 2.91E-07 |
| MAU2      | -1.61052 | 1.64E-06 |
| SLC35F1   | -1.61015 | 3.71E-06 |
| TMC6      | -1.61013 | 3.11E-05 |
| CBL       | -1.60729 | 2.89E-05 |
| ANKFY1    | -1.60533 | 2.56E-05 |
| ERGIC1    | -1.60513 | 4.38E-04 |
| KIAA0247  | -1.60403 | 1.36E-07 |
| METTL7B   | -1.60368 | 2.37E-06 |
| MKNK2     | -1.60326 | 1.45E-04 |
| GAB2      | -1.60192 | 1.32E-04 |
| CAPN5     | -1.60167 | 5.76E-05 |
| REPIN1    | -1.60147 | 1.01E-03 |
| DSCR3     | -1.60092 | 3.29E-07 |
| HN1L      | -1.6002  | 6.39E-07 |
| RRP1B     | -1.59878 | 1.80E-04 |
| SLC20A2   | -1.59859 | 3.90E-05 |
| SLC45A3   | -1.59816 | 1.04E-07 |
| ZC3H3     | -1.59792 | 2.10E-06 |
| GYG2      | -1.59748 | 5.09E-05 |
| ARMC10    | -1.59549 | 9.95E-05 |
| PHACTR4   | -1.59474 | 4.01E-06 |
| SORT1     | -1.59298 | 1.43E-05 |
| SERPINH1  | -1.59168 | 1.05E-04 |
| MGAT2     | -1.59141 | 8.14E-06 |

|          |          |          |
|----------|----------|----------|
| SPTY2D1  | -1.59129 | 7.11E-06 |
| PNKD     | -1.59058 | 1.84E-04 |
| SERP1    | -1.58941 | 1.47E-06 |
| TRAM2    | -1.58934 | 7.92E-06 |
| RELA     | -1.58849 | 3.91E-06 |
| CXXC5    | -1.58818 | 6.07E-07 |
| DBNL     | -1.58767 | 8.16E-06 |
| MCRS1    | -1.58745 | 1.65E-06 |
| MT2A     | -1.58719 | 1.31E-05 |
| TRAK2    | -1.5868  | 1.26E-04 |
| UBIAD1   | -1.58647 | 1.10E-05 |
| REXO1    | -1.58496 | 3.14E-06 |
| MT1A     | -1.58492 | 4.38E-06 |
| KDM5B    | -1.58489 | 1.60E-05 |
| C9orf86  | -1.58453 | 9.79E-07 |
| MX1      | -1.58441 | 1.88E-05 |
| TMEM106B | -1.58358 | 1.78E-05 |
| C19orf28 | -1.57808 | 2.52E-05 |
| LYPLA2   | -1.57661 | 2.56E-06 |
| RYK      | -1.57635 | 2.50E-05 |
| DSG2     | -1.57567 | 1.01E-06 |
| ITFG2    | -1.57517 | 3.68E-05 |
| GYG2     | -1.57342 | 3.99E-05 |
| FXYD5    | -1.57254 | 5.90E-05 |
| EXTL1    | -1.57247 | 5.22E-05 |
| MITF     | -1.56986 | 1.28E-05 |
| PPRC1    | -1.56975 | 1.36E-06 |
| NPTX1    | -1.56951 | 1.39E-03 |
| CAMK2D   | -1.56762 | 3.45E-05 |
| FAF2     | -1.56677 | 6.39E-05 |
| GIT1     | -1.56667 | 1.19E-04 |
| SLC6A15  | -1.56622 | 9.16E-08 |
| TXLNA    | -1.56619 | 3.90E-04 |
| SP1      | -1.56604 | 3.30E-04 |
| TMBIM6   | -1.56534 | 2.74E-07 |
| CKS2     | -1.56515 | 1.06E-05 |
| KIAA1147 | -1.56489 | 6.00E-05 |
| ECE2     | -1.56244 | 2.01E-06 |
| ICK      | -1.56239 | 7.76E-07 |
| SARS2    | -1.56137 | 5.03E-06 |
| ADAT1    | -1.56119 | 8.81E-05 |
| AP1M1    | -1.56077 | 2.73E-04 |
| CADPS2   | -1.56011 | 8.07E-08 |
| FHDC1    | -1.55982 | 7.99E-06 |

|          |          |          |
|----------|----------|----------|
| CDK5R1   | -1.55972 | 6.21E-07 |
| RHOQ     | -1.55972 | 5.77E-05 |
| MAFG     | -1.55899 | 1.76E-06 |
| PRRG1    | -1.55888 | 1.24E-06 |
| BIRC7    | -1.55721 | 1.48E-05 |
| METTL21B | -1.55616 | 8.00E-06 |
| DBNDD1   | -1.55546 | 3.14E-05 |
| C9orf23  | -1.55447 | 4.86E-06 |
| FAM83D   | -1.55419 | 4.57E-06 |
| LINGO1   | -1.55406 | 6.58E-08 |
| TMUB2    | -1.55324 | 1.91E-06 |
| CPNE8    | -1.55292 | 2.41E-05 |
| CLIC4    | -1.55265 | 1.57E-04 |
| TGFA     | -1.55265 | 2.42E-05 |
| USP46    | -1.55211 | 1.83E-07 |
| CORO1C   | -1.55206 | 1.01E-06 |
| MFSD3    | -1.55162 | 4.54E-04 |
| RNF20    | -1.55134 | 1.56E-05 |
| KIAA1737 | -1.55031 | 6.85E-05 |
| C15orf57 | -1.54993 | 4.63E-05 |
| CDK2     | -1.5497  | 4.99E-04 |
| C19orf28 | -1.54896 | 3.88E-05 |
| AGAP3    | -1.5488  | 1.01E-06 |
| HSPBP1   | -1.5487  | 1.15E-05 |
| CADM1    | -1.54842 | 9.63E-06 |
| NCLN     | -1.54799 | 1.96E-03 |
| ZMAT5    | -1.54658 | 3.12E-04 |
| MAP6D1   | -1.54473 | 2.06E-05 |
| NRGN     | -1.5423  | 7.44E-04 |
| EFHD2    | -1.54168 | 6.51E-06 |
| HCP5     | -1.54104 | 1.92E-05 |
| RFC5     | -1.54009 | 1.97E-05 |
| ADCK2    | -1.53879 | 5.94E-05 |
| CMTM4    | -1.53874 | 3.20E-05 |
| RYK      | -1.53801 | 5.05E-04 |
| KLHL21   | -1.5373  | 1.73E-04 |
| GRWD1    | -1.53636 | 8.36E-05 |
| SLC6A8   | -1.53605 | 1.38E-04 |
| PPARGC1A | -1.53507 | 1.64E-06 |
| ZDHHC16  | -1.53468 | 4.38E-04 |
| MIF4GD   | -1.53431 | 3.51E-04 |
| SLC35B2  | -1.5339  | 4.07E-04 |
| PACS1    | -1.53268 | 2.73E-04 |
| SMO      | -1.53264 | 1.57E-06 |

|          |          |          |
|----------|----------|----------|
| CAMKK2   | -1.53197 | 2.84E-06 |
| ISY1     | -1.53136 | 3.14E-05 |
| SETDB1   | -1.53015 | 1.52E-04 |
| URB2     | -1.52954 | 1.20E-05 |
| EI24     | -1.52823 | 2.40E-04 |
| WIPF1    | -1.52753 | 7.57E-06 |
| DPYSL3   | -1.52749 | 1.54E-05 |
| ABR      | -1.52705 | 5.99E-05 |
| PPP2R4   | -1.52579 | 2.26E-05 |
| RSBN1    | -1.52334 | 9.28E-06 |
| LRRC8A   | -1.5219  | 1.45E-05 |
| ST3GAL5  | -1.52138 | 4.29E-04 |
| SPOCD1   | -1.52091 | 2.87E-06 |
| RAB38    | -1.52065 | 1.92E-04 |
| AGFG1    | -1.5202  | 1.23E-06 |
| RFFL     | -1.51979 | 4.43E-05 |
| VOPP1    | -1.51958 | 5.31E-04 |
| SLC16A6  | -1.51877 | 3.24E-05 |
| COBRA1   | -1.51862 | 2.55E-03 |
| C17orf63 | -1.51771 | 1.24E-04 |
| OSBPL3   | -1.51767 | 1.94E-06 |
| ECE2     | -1.51746 | 1.92E-06 |
| UBR7     | -1.51616 | 1.79E-05 |
| PPP1R3C  | -1.51612 | 8.83E-05 |
| ALKBH2   | -1.51569 | 2.62E-04 |
| XYLT1    | -1.51491 | 2.17E-06 |
| NMI      | -1.51483 | 2.25E-03 |
| WFS1     | -1.51376 | 1.14E-04 |
| LAD1     | -1.51372 | 1.86E-06 |
| CASP2    | -1.51296 | 2.86E-04 |
| TM9SF1   | -1.51259 | 2.19E-05 |
| TMEM214  | -1.51228 | 2.37E-04 |
| WDR91    | -1.51187 | 8.41E-04 |
| PKMYT1   | -1.5115  | 9.87E-04 |
| TMEM180  | -1.50994 | 3.76E-05 |
| SKP2     | -1.50949 | 3.76E-06 |
| IRS2     | -1.50889 | 2.69E-05 |
| EML3     | -1.50824 | 5.57E-06 |
| CKS2     | -1.50742 | 6.11E-05 |
| OST4     | -1.50668 | 1.59E-05 |
| SGK223   | -1.50609 | 4.30E-05 |
| FOXO3    | -1.50466 | 4.91E-07 |
| ARF4     | -1.50402 | 1.18E-05 |
| DCTD     | -1.50388 | 5.40E-06 |

|         |          |          |
|---------|----------|----------|
| EXD2    | -1.50366 | 3.63E-06 |
| UBE2E2  | -1.50118 | 2.89E-05 |
| CPNE8   | -1.50117 | 5.48E-05 |
| PLEKHA2 | -1.50087 | 7.09E-05 |
| SLC7A1  | -1.5008  | 1.33E-05 |
| B4GALT7 | -1.50062 | 1.25E-05 |
