# Supplementary material for: microRNA-7-5p inhibits melanoma cell proliferation and metastasis by suppressing RelA/NF-κB
Source: PubMed Central journal article supplement (PMC5077967; doi:10.18632/oncotarget.9421), 2016-05-17
Supplement: oncotarget-07-31663-s004.pdf [file oncotarget-07-31663-s004.pdf]

**Supplementary Table S3: Genes downregulated in the microarray that contain a miR-7-5p seed sequence.**

| <b>Gene Symbol</b> | <b>Fold Change</b> | <b>Confidence of miR-7 seed region</b> | <b>Pathway</b>                                                                                                                                                                                                                                                                                                                                                                                                                                                                                                                                                                                                                                                                                                                                                                                                                                                                                                                                                                                                              |
|--------------------|--------------------|----------------------------------------|-----------------------------------------------------------------------------------------------------------------------------------------------------------------------------------------------------------------------------------------------------------------------------------------------------------------------------------------------------------------------------------------------------------------------------------------------------------------------------------------------------------------------------------------------------------------------------------------------------------------------------------------------------------------------------------------------------------------------------------------------------------------------------------------------------------------------------------------------------------------------------------------------------------------------------------------------------------------------------------------------------------------------------|
| ACSL4              | -1.812             | High (predicted)                       | Fatty Acid Activation Fatty Acid $\beta$ -oxidation I LPS/IL-1 Mediated Inhibition of RXR Function Mitochondrial L-carnitine Shuttle Pathway Stearate Biosynthesis I (Animals) Type II Diabetes Mellitus Signaling $\gamma$ -linolenate Biosynthesis II (Animals)                                                                                                                                                                                                                                                                                                                                                                                                                                                                                                                                                                                                                                                                                                                                                           |
| ADCY9              | -1.678             | High (predicted)                       | Breast Cancer Regulation by Stathmin1 CDK5 Signaling CREB Signaling in Neurons CXCR4 Signaling Cardiac Hypertrophy Signaling Cardiac $\beta$ -adrenergic Signaling Cellular Effects of Sildenafil (Viagra) Colorectal Cancer Metastasis Signaling Corticotropin Releasing Hormone Signaling Dopamine Receptor Signaling Dopamine-DARPP32 Feedback in cAMP Signaling Endothelin-1 Signaling G-Protein Coupled Receptor Signaling GNRH Signaling Gap Junction Signaling Gai Signaling G $\alpha$ s Signaling Hepatic Cholestasis IL-1 Signaling Leptin Signaling in Obesity Melanocyte Development and Pigmentation Signaling Molecular Mechanisms of Cancer P2Y Purigenic Receptor Signaling Pathway PPAR $\alpha$ /RXR $\alpha$ Activation Phospholipase C Signaling Protein Kinase A Signaling RAR Activation Relaxin Signaling Renin-Angiotensin Signaling Role of NFAT in Cardiac Hypertrophy Sphingosine-1-phosphate Signaling Thrombin Signaling cAMP-mediated signaling eNOS Signaling $\alpha$ -Adrenergic Signaling |
| ANKFY1             | -1.605             | High (predicted)                       | Macropinocytosis Signaling                                                                                                                                                                                                                                                                                                                                                                                                                                                                                                                                                                                                                                                                                                                                                                                                                                                                                                                                                                                                  |
| ARF4               | -1.897             | Moderate (predicted)                   | Integrin Signaling                                                                                                                                                                                                                                                                                                                                                                                                                                                                                                                                                                                                                                                                                                                                                                                                                                                                                                                                                                                                          |
| ARMC10             | -2.902             | Moderate (predicted)                   |                                                                                                                                                                                                                                                                                                                                                                                                                                                                                                                                                                                                                                                                                                                                                                                                                                                                                                                                                                                                                             |
| ATG7               | -1.615             | High (predicted)                       |                                                                                                                                                                                                                                                                                                                                                                                                                                                                                                                                                                                                                                                                                                                                                                                                                                                                                                                                                                                                                             |
| BCL2L12            | -3.544             | Moderate (predicted)                   |                                                                                                                                                                                                                                                                                                                                                                                                                                                                                                                                                                                                                                                                                                                                                                                                                                                                                                                                                                                                                             |
| CNO                | -1.934             | High (predicted)                       |                                                                                                                                                                                                                                                                                                                                                                                                                                                                                                                                                                                                                                                                                                                                                                                                                                                                                                                                                                                                                             |
| C10orf57           | -1.871             | High (predicted)                       |                                                                                                                                                                                                                                                                                                                                                                                                                                                                                                                                                                                                                                                                                                                                                                                                                                                                                                                                                                                                                             |

|          |        |                      |                                                                                                                                                                                                                                                                                                                                                                                                                                                                                                                                                                                                                                                                                                                                                                                                                                                                                                                                                                                                                                                                                                                                                                                                                                                                                                                                              |
|----------|--------|----------------------|----------------------------------------------------------------------------------------------------------------------------------------------------------------------------------------------------------------------------------------------------------------------------------------------------------------------------------------------------------------------------------------------------------------------------------------------------------------------------------------------------------------------------------------------------------------------------------------------------------------------------------------------------------------------------------------------------------------------------------------------------------------------------------------------------------------------------------------------------------------------------------------------------------------------------------------------------------------------------------------------------------------------------------------------------------------------------------------------------------------------------------------------------------------------------------------------------------------------------------------------------------------------------------------------------------------------------------------------|
| C12orf49 | -1.797 | Moderate (predicted) |                                                                                                                                                                                                                                                                                                                                                                                                                                                                                                                                                                                                                                                                                                                                                                                                                                                                                                                                                                                                                                                                                                                                                                                                                                                                                                                                              |
| C1orf21  | -1.794 | High (predicted)     |                                                                                                                                                                                                                                                                                                                                                                                                                                                                                                                                                                                                                                                                                                                                                                                                                                                                                                                                                                                                                                                                                                                                                                                                                                                                                                                                              |
| C20orf24 | -2.267 | High (predicted)     |                                                                                                                                                                                                                                                                                                                                                                                                                                                                                                                                                                                                                                                                                                                                                                                                                                                                                                                                                                                                                                                                                                                                                                                                                                                                                                                                              |
| CALM3    | -2.803 | Moderate (predicted) | Androgen Signaling B Cell Receptor Signaling Breast Cancer Regulation by Stathmin1 CCR3 Signaling in Eosinophils CCR5 Signaling in Macrophages CD28 Signaling in T Helper Cells CREB Signaling in Neurons Calcium Signaling Calcium-induced T Lymphocyte Apoptosis Cardiac Hypertrophy Signaling Cellular Effects of Sildenafil (Viagra) Chemokine Signaling Corticotropin Releasing Hormone Signaling Dopamine-DARPP32 Feedback in cAMP Signaling Glioma Signaling Glutamate Receptor Signaling Gαq Signaling Melatonin Signaling Nitric Oxide Signaling in the Cardiovascular System Nur77 Signaling in T Lymphocytes PI3K Signaling in B Lymphocytes Phospholipase C Signaling Protein Kinase A Signaling RANK Signaling in Osteoclasts Regulation of IL-2 Expression in Activated and Anergic T Lymphocytes Role of Macrophages, Fibroblasts and Endothelial Cells in Rheumatoid Arthritis Role of NFAT in Cardiac Hypertrophy Role of NFAT in Regulation of the Immune Response Role of Osteoblasts, Osteoclasts and Chondrocytes in Rheumatoid Arthritis Synaptic Long Term Potentiation T Cell Receptor Signaling cAMP-mediated signaling eNOS Signaling fMLP Signaling in Neutrophils iCOS-iCOSL Signaling in T Helper Cells iNOS Signaling nNOS Signaling in Neurons nNOS Signaling in Skeletal Muscle Cells α-Adrenergic Signaling |
| CALU     | -1.670 | High (predicted)     |                                                                                                                                                                                                                                                                                                                                                                                                                                                                                                                                                                                                                                                                                                                                                                                                                                                                                                                                                                                                                                                                                                                                                                                                                                                                                                                                              |
| CAMK2D   | -1.623 | High (predicted)     | B Cell Receptor Signaling Breast Cancer Regulation by Stathmin1 CREB Signaling in Neurons Calcium Signaling Chemokine Signaling Crosstalk between Dendritic Cells and Natural Killer Cells G-Protein Coupled Receptor Signaling GM-CSF Signaling GNRH Signaling Glioma Signaling Melatonin Signaling Molecular Mechanisms of Cancer Neuropathic Pain Signaling In Dorsal Horn Neurons PI3K Signaling in B Lymphocytes PKCθ Signaling in T Lymphocytes Protein Kinase A Signaling Role of Macrophages, Fibroblasts and Endothelial Cells in Rheumatoid Arthritis Role of NFAT in Cardiac Hypertrophy Synaptic Long Term Potentiation Thrombin Signaling Xenobiotic Metabolism Signaling cAMP-mediated signaling iCOS-iCOSL Signaling in T Helper Cells                                                                                                                                                                                                                                                                                                                                                                                                                                                                                                                                                                                        |
| CAMKK2   | -1.532 | Moderate (predicted) | Calcium Signaling Dopamine-DARPP32 Feedback in cAMP Signaling                                                                                                                                                                                                                                                                                                                                                                                                                                                                                                                                                                                                                                                                                                                                                                                                                                                                                                                                                                                                                                                                                                                                                                                                                                                                                |

|         |        |                      |                                                                                                                                                                                                                                             |
|---------|--------|----------------------|---------------------------------------------------------------------------------------------------------------------------------------------------------------------------------------------------------------------------------------------|
| CAPZA1  | -1.630 | Moderate (predicted) |                                                                                                                                                                                                                                             |
| CAV1    | -2.063 | Moderate (predicted) | Caveolar-mediated Endocytosis Signaling G Beta Gamma Signaling Gap Junction Signaling Gai Signaling Integrin Signaling Nitric Oxide Signaling in the Cardiovascular System PDGF Signaling Virus Entry via Endocytic Pathways eNOS Signaling |
| CISD2   | -1.881 | High (predicted)     |                                                                                                                                                                                                                                             |
| CKAP4   | -4.226 | High (predicted)     |                                                                                                                                                                                                                                             |
| CLIC4   | -1.553 | Moderate (predicted) |                                                                                                                                                                                                                                             |
| CNN3    | -2.865 | High (predicted)     |                                                                                                                                                                                                                                             |
| CNOT8   | -1.622 | High (predicted)     |                                                                                                                                                                                                                                             |
| COL1A2  | -1.974 | High (predicted)     | Atherosclerosis Signaling Dendritic Cell Maturation Hepatic Fibrosis / Hepatic Stellate Cell Activation Intrinsic Prothrombin Activation Pathway                                                                                            |
| COMMD7  | -2.270 | Moderate (predicted) |                                                                                                                                                                                                                                             |
| CRTAP   | -6.729 | Moderate (predicted) |                                                                                                                                                                                                                                             |
| CTDSP2  | -2.457 | High (predicted)     |                                                                                                                                                                                                                                             |
| CTDSPL  | -2.328 | High (predicted)     |                                                                                                                                                                                                                                             |
| CTSK    | -6.274 | High (predicted)     | Role of Osteoblasts, Osteoclasts and Chondrocytes in Rheumatoid Arthritis                                                                                                                                                                   |
| DAZAP2  | -3.338 | High (predicted)     |                                                                                                                                                                                                                                             |
| DBNL    | -1.588 | Moderate (predicted) |                                                                                                                                                                                                                                             |
| DNAJC15 | -2.049 | High (predicted)     | Aldosterone Signaling in Epithelial Cells NRF2-mediated Oxidative Stress Response Protein Ubiquitination Pathway                                                                                                                            |
| DPYSL2  | -1.620 | High (predicted)     | Axonal Guidance Signaling Semaphorin Signaling in Neurons Thymine Degradation Uracil Degradation II (Reductive)                                                                                                                             |
| EGR3    | -1.727 | High (predicted)     |                                                                                                                                                                                                                                             |

|         |        |                                          |                                                                                                                                                                                                                                                                                                                                   |
|---------|--------|------------------------------------------|-----------------------------------------------------------------------------------------------------------------------------------------------------------------------------------------------------------------------------------------------------------------------------------------------------------------------------------|
| EHD1    | -2.799 | High (predicted)                         |                                                                                                                                                                                                                                                                                                                                   |
| EIF2AK1 | -2.366 | High (predicted)                         | EIF2 Signaling                                                                                                                                                                                                                                                                                                                    |
| ENO2    | -1.919 | Moderate (predicted)                     | Gluconeogenesis I Glycolysis I                                                                                                                                                                                                                                                                                                    |
| EXOSC2  | -1.660 | High (predicted)                         |                                                                                                                                                                                                                                                                                                                                   |
| EXTL3   | -1.783 | High (predicted)                         | Heparan Sulfate Biosynthesis Heparan Sulfate Biosynthesis (Late Stages)                                                                                                                                                                                                                                                           |
| FAM46C  | -2.812 | High (predicted)                         |                                                                                                                                                                                                                                                                                                                                   |
| FGF13   | -1.656 | Moderate (predicted)                     | Actin Cytoskeleton Signaling Bladder Cancer Signaling Clathrin-mediated Endocytosis Signaling FGF Signaling                                                                                                                                                                                                                       |
| GLO1    | -3.508 | Moderate (predicted)                     | Methylglyoxal Degradation I                                                                                                                                                                                                                                                                                                       |
| GLS     | -2.411 | Moderate (predicted)                     | Citrulline Biosynthesis Glutamate Receptor Signaling Glutamine Degradation I Huntington's Disease Signaling Superpathway of Citrulline Metabolism                                                                                                                                                                                 |
| HECTD3  | -1.717 | High (predicted)                         |                                                                                                                                                                                                                                                                                                                                   |
| HIATL1  | -2.611 | Moderate (predicted)                     |                                                                                                                                                                                                                                                                                                                                   |
| HMGN4   | -2.098 | High (predicted)                         |                                                                                                                                                                                                                                                                                                                                   |
| IDE     | -2.033 | High (predicted)                         | Neuroprotective Role of THOP1 in Alzheimer's Disease                                                                                                                                                                                                                                                                              |
| IGSF3   | -1.842 | Moderate (predicted)                     |                                                                                                                                                                                                                                                                                                                                   |
| IRS2    | -1.509 | Experimentally Observed,High (predicted) | AMPK Signaling GDNF Family Ligand-Receptor Interactions IGF-1 Signaling IL-9 Signaling ILK Signaling Insulin Receptor Signaling PI3K Signaling in B Lymphocytes Role of JAK1 and JAK3 in $\gamma$ Cytokine Signaling Role of JAK2 in Hormone-like Cytokine Signaling Thrombopoietin Signaling Type II Diabetes Mellitus Signaling |
| ISY1    | -1.531 | Moderate (predicted)                     |                                                                                                                                                                                                                                                                                                                                   |
| ITFG2   | -1.575 | Moderate (predicted)                     |                                                                                                                                                                                                                                                                                                                                   |

|          |        |                                               |                                                                                                                                                                                                                                                                                                                                                                                                                                                                                                                                                                                                                                                                                                                                                                                                                                                                                                                                                                                                                          |
|----------|--------|-----------------------------------------------|--------------------------------------------------------------------------------------------------------------------------------------------------------------------------------------------------------------------------------------------------------------------------------------------------------------------------------------------------------------------------------------------------------------------------------------------------------------------------------------------------------------------------------------------------------------------------------------------------------------------------------------------------------------------------------------------------------------------------------------------------------------------------------------------------------------------------------------------------------------------------------------------------------------------------------------------------------------------------------------------------------------------------|
| KDM5B    | -1.585 | Moderate (predicted)                          | Role of Oct4 in Mammalian Embryonic Stem Cell Pluripotency                                                                                                                                                                                                                                                                                                                                                                                                                                                                                                                                                                                                                                                                                                                                                                                                                                                                                                                                                               |
| KIAA0247 | -1.604 | High (predicted)                              |                                                                                                                                                                                                                                                                                                                                                                                                                                                                                                                                                                                                                                                                                                                                                                                                                                                                                                                                                                                                                          |
| KPNA6    | -2.407 | High (predicted)                              | RAN Signaling                                                                                                                                                                                                                                                                                                                                                                                                                                                                                                                                                                                                                                                                                                                                                                                                                                                                                                                                                                                                            |
| MAFG     | -1.617 | High (predicted)                              | NRF2-mediated Oxidative Stress Response                                                                                                                                                                                                                                                                                                                                                                                                                                                                                                                                                                                                                                                                                                                                                                                                                                                                                                                                                                                  |
| MAU2     | -1.611 | High (predicted)                              |                                                                                                                                                                                                                                                                                                                                                                                                                                                                                                                                                                                                                                                                                                                                                                                                                                                                                                                                                                                                                          |
| MAZ      | -1.685 | High (predicted)                              |                                                                                                                                                                                                                                                                                                                                                                                                                                                                                                                                                                                                                                                                                                                                                                                                                                                                                                                                                                                                                          |
| MMACHC   | -1.853 | Moderate (predicted)                          |                                                                                                                                                                                                                                                                                                                                                                                                                                                                                                                                                                                                                                                                                                                                                                                                                                                                                                                                                                                                                          |
| MRAP2    | -1.669 | Moderate (predicted)                          |                                                                                                                                                                                                                                                                                                                                                                                                                                                                                                                                                                                                                                                                                                                                                                                                                                                                                                                                                                                                                          |
| NDFIP2   | -1.950 | High (predicted)                              |                                                                                                                                                                                                                                                                                                                                                                                                                                                                                                                                                                                                                                                                                                                                                                                                                                                                                                                                                                                                                          |
| NDUFA4   | -2.690 | High (predicted)                              | Mitochondrial Dysfunction                                                                                                                                                                                                                                                                                                                                                                                                                                                                                                                                                                                                                                                                                                                                                                                                                                                                                                                                                                                                |
| NR1H2    | -2.648 | High (predicted)                              | LPS/IL-1 Mediated Inhibition of RXR Function LXR/RXR Activation                                                                                                                                                                                                                                                                                                                                                                                                                                                                                                                                                                                                                                                                                                                                                                                                                                                                                                                                                          |
| NUDCD3   | -2.373 | High (predicted)                              |                                                                                                                                                                                                                                                                                                                                                                                                                                                                                                                                                                                                                                                                                                                                                                                                                                                                                                                                                                                                                          |
| OSBPL3   | -1.518 | High (predicted)                              |                                                                                                                                                                                                                                                                                                                                                                                                                                                                                                                                                                                                                                                                                                                                                                                                                                                                                                                                                                                                                          |
| OST4     | -1.507 | High (predicted)                              |                                                                                                                                                                                                                                                                                                                                                                                                                                                                                                                                                                                                                                                                                                                                                                                                                                                                                                                                                                                                                          |
| PAK1     | -1.631 | Experimentally Observed, Moderate (predicted) | Actin Cytoskeleton Signaling Agrin Interactions at Neuromuscular Junction Amyotrophic Lateral Sclerosis Signaling Angiopoietin Signaling Axonal Guidance Signaling Breast Cancer Regulation by Stathmin1 CCR3 Signaling in Eosinophils CD28 Signaling in T Helper Cells CXCR4 Signaling Cdc42 Signaling ERK/MAPK Signaling Ephrin A Signaling Ephrin B Signaling Ephrin Receptor Signaling ErbB Signaling FAK Signaling Fcy Receptor-mediated Phagocytosis in Macrophages and Monocytes G Beta Gamma Signaling GNRH Signaling Germ Cell-Sertoli Cell Junction Signaling HGF Signaling IL-3 Signaling Integrin Signaling LPS-stimulated MAPK Signaling Macropinocytosis Signaling Molecular Mechanisms of Cancer Natural Killer Cell Signaling PAK Signaling Paxillin Signaling Pyridoxal 5'-phosphate Salvage Pathway Rac Signaling Regulation of Actin-based Motility by Rho Renal Cell Carcinoma Signaling Renin-Angiotensin Signaling RhoGDI Signaling Role of Tissue Factor in Cancer Salvage Pathways of Pyrimidine |

|           |        |                              |                                                                                                                                                                                                                                                                                                                                                                                                                                                                                                                                                                                                                                                                                                                                                                       |
|-----------|--------|------------------------------|-----------------------------------------------------------------------------------------------------------------------------------------------------------------------------------------------------------------------------------------------------------------------------------------------------------------------------------------------------------------------------------------------------------------------------------------------------------------------------------------------------------------------------------------------------------------------------------------------------------------------------------------------------------------------------------------------------------------------------------------------------------------------|
|           |        |                              | Ribonucleotides Semaphorin Signaling in Neurons Signaling by Rho Family GTPases TNFR1 Signaling                                                                                                                                                                                                                                                                                                                                                                                                                                                                                                                                                                                                                                                                       |
| PAK2      | -2.036 | Moderate (predicted)         | Actin Cytoskeleton Signaling Agrin Interactions at Neuromuscular Junction Angiopoietin Signaling Axonal Guidance Signaling CCR3 Signaling in Eosinophils CXCR4 Signaling Cdc42 Signaling ERK/MAPK Signaling Ephrin Receptor Signaling ErbB Signaling FAK Signaling GNRH Signaling Germ Cell-Sertoli Cell Junction Signaling IL-8 Signaling Integrin Signaling Molecular Mechanisms of Cancer Natural Killer Cell Signaling PAK Signaling Paxillin Signaling Pyridoxal 5'-phosphate Salvage Pathway Rac Signaling Regulation of Actin-based Motility by Rho Renal Cell Carcinoma Signaling Renin-Angiotensin Signaling RhoGDI Signaling Salvage Pathways of Pyrimidine Ribonucleotides Semaphorin Signaling in Neurons Signaling by Rho Family GTPases TNFR1 Signaling |
| PATL1     | -2.337 | High (predicted)             |                                                                                                                                                                                                                                                                                                                                                                                                                                                                                                                                                                                                                                                                                                                                                                       |
| PDXDC1    | -2.168 | High (predicted)             |                                                                                                                                                                                                                                                                                                                                                                                                                                                                                                                                                                                                                                                                                                                                                                       |
| PFN2      | -2.079 | High (predicted)             | Actin Cytoskeleton Signaling Axonal Guidance Signaling Regulation of Actin-based Motility by Rho RhoA Signaling                                                                                                                                                                                                                                                                                                                                                                                                                                                                                                                                                                                                                                                       |
| PHACTR4   | -1.595 | High (predicted)             |                                                                                                                                                                                                                                                                                                                                                                                                                                                                                                                                                                                                                                                                                                                                                                       |
| PHF16     | -2.089 | Moderate (predicted)         |                                                                                                                                                                                                                                                                                                                                                                                                                                                                                                                                                                                                                                                                                                                                                                       |
| PIGH      | -2.844 | High (predicted)             |                                                                                                                                                                                                                                                                                                                                                                                                                                                                                                                                                                                                                                                                                                                                                                       |
| PLEC      | -1.989 | High (predicted)             |                                                                                                                                                                                                                                                                                                                                                                                                                                                                                                                                                                                                                                                                                                                                                                       |
| PLXNA1    | -1.940 | High (predicted)             | Axonal Guidance Signaling RhoA Signaling Semaphorin Signaling in Neurons                                                                                                                                                                                                                                                                                                                                                                                                                                                                                                                                                                                                                                                                                              |
| POLE4     | -6.861 | High (predicted)             |                                                                                                                                                                                                                                                                                                                                                                                                                                                                                                                                                                                                                                                                                                                                                                       |
| PRMT2     | -2.310 | High (predicted)             | RAR Activation                                                                                                                                                                                                                                                                                                                                                                                                                                                                                                                                                                                                                                                                                                                                                        |
| PSME3     | -5.862 | High (predicted)             | Polyamine Regulation in Colon Cancer                                                                                                                                                                                                                                                                                                                                                                                                                                                                                                                                                                                                                                                                                                                                  |
| PURB      | -1.803 | High (predicted)             |                                                                                                                                                                                                                                                                                                                                                                                                                                                                                                                                                                                                                                                                                                                                                                       |
| RAB11FIP5 | -1.616 | High (predicted)             |                                                                                                                                                                                                                                                                                                                                                                                                                                                                                                                                                                                                                                                                                                                                                                       |
| RAF1      | -2.594 | Experimentally Observed,High | 14-3-3-mediated Signaling Actin Cytoskeleton Signaling Acute Myeloid Leukemia Signaling Acute Phase Response Signaling Aldosterone Signaling in Epithelial Cells                                                                                                                                                                                                                                                                                                                                                                                                                                                                                                                                                                                                      |

|  |  |             |                                                                                                                                                                                                                                                                                                                                                                                                                                                                                                                                                                                                                                                                                                                                                                                                                                                                                                                                                                                                                                                                                                                                                                                                                                                                                                                                                                                                                                                                                                                                                                                                                                                                                                                                                                                                                                                                                                                                                                                                                                                                                                                                                                                                                                                                                                                                                                                                                                                                                                                                                                                                                                                                                                                                                                                                                                                                                                                          |
|--|--|-------------|--------------------------------------------------------------------------------------------------------------------------------------------------------------------------------------------------------------------------------------------------------------------------------------------------------------------------------------------------------------------------------------------------------------------------------------------------------------------------------------------------------------------------------------------------------------------------------------------------------------------------------------------------------------------------------------------------------------------------------------------------------------------------------------------------------------------------------------------------------------------------------------------------------------------------------------------------------------------------------------------------------------------------------------------------------------------------------------------------------------------------------------------------------------------------------------------------------------------------------------------------------------------------------------------------------------------------------------------------------------------------------------------------------------------------------------------------------------------------------------------------------------------------------------------------------------------------------------------------------------------------------------------------------------------------------------------------------------------------------------------------------------------------------------------------------------------------------------------------------------------------------------------------------------------------------------------------------------------------------------------------------------------------------------------------------------------------------------------------------------------------------------------------------------------------------------------------------------------------------------------------------------------------------------------------------------------------------------------------------------------------------------------------------------------------------------------------------------------------------------------------------------------------------------------------------------------------------------------------------------------------------------------------------------------------------------------------------------------------------------------------------------------------------------------------------------------------------------------------------------------------------------------------------------------------|
|  |  | (predicted) | <p>Apoptosis Signaling Axonal Guidance Signaling B Cell Receptor Signaling BMP signaling pathway Bladder Cancer Signaling Breast Cancer Regulation by Stathmin1 CCR3 Signaling in Eosinophils CDK5 Signaling CNTF Signaling CREB Signaling in Neurons CXCR4 Signaling Cardiac Hypertrophy Signaling Cdc42 Signaling Ceramide Signaling Chemokine Signaling Cholecystokinin/Gastrin-mediated Signaling Chronic Myeloid Leukemia Signaling Corticotropin Releasing Hormone Signaling Cyclins and Cell Cycle Regulation EGF Signaling EIF2 Signaling ERK/MAPK Signaling Endometrial Cancer Signaling Endothelin-1 Signaling Ephrin Receptor Signaling ErbB Signaling ErbB2-ErbB3 Signaling ErbB4 Signaling Erythropoietin Signaling Estrogen Receptor Signaling FAK Signaling FGF Signaling FLT3 Signaling in Hematopoietic Progenitor Cells Fc Epsilon RI Signaling G Beta Gamma Signaling G-Protein Coupled Receptor Signaling GDNF Family Ligand-Receptor Interactions GM-CSF Signaling GNRH Signaling Gap Junction Signaling Glioblastoma Multiforme Signaling Glioma Signaling Glucocorticoid Receptor Signaling Gα12/13 Signaling Gαi Signaling Gαq Signaling HGF Signaling IGF-1 Signaling IL-15 Signaling IL-2 Signaling IL-3 Signaling IL-6 Signaling IL-8 Signaling Insulin Receptor Signaling Integrin Signaling JAK/Stat Signaling LPS-stimulated MAPK Signaling Melanocyte Development and Pigmentation Signaling Melanoma Signaling Melatonin Signaling Molecular Mechanisms of Cancer Mouse Embryonic Stem Cell Pluripotency NF-κB Activation by Viruses NGF Signaling NRF2-mediated Oxidative Stress Response Natural Killer Cell Signaling Neuregulin Signaling Neurotrophin/TRK Signaling Non-Small Cell Lung Cancer Signaling Oncostatin M Signaling Ovarian Cancer Signaling P2Y Purigenic Receptor Signaling Pathway PAK Signaling PDGF Signaling PEDF Signaling PI3K Signaling in B Lymphocytes PI3K/AKT Signaling PPAR Signaling PPARα/RXRα Activation PTEN Signaling Pancreatic Adenocarcinoma Signaling Phospholipase C Signaling Prolactin Signaling Prostate Cancer Signaling Protein Kinase A Signaling RANK Signaling in Osteoclasts Rac Signaling Regulation of IL-2 Expression in Activated and Anergic T Lymphocytes Regulation of eIF4 and p70S6K Signaling Renal Cell Carcinoma Signaling Renin-Angiotensin Signaling Role of IL-17F in Allergic Inflammatory Airway Diseases Role of JAK1, JAK2 and TYK2 in Interferon Signaling Role of MAPK Signaling in the Pathogenesis of Influenza Role of Macrophages, Fibroblasts and Endothelial Cells in Rheumatoid Arthritis Role of NANOG in Mammalian Embryonic Stem Cell Pluripotency Role of NFAT in Cardiac Hypertrophy Role of NFAT in Regulation of the Immune Response Sertoli Cell-Sertoli Cell Junction Signaling Signaling by Rho Family GTPases Synaptic Long Term Depression Synaptic Long Term Potentiation T Cell Receptor</p> |
|--|--|-------------|--------------------------------------------------------------------------------------------------------------------------------------------------------------------------------------------------------------------------------------------------------------------------------------------------------------------------------------------------------------------------------------------------------------------------------------------------------------------------------------------------------------------------------------------------------------------------------------------------------------------------------------------------------------------------------------------------------------------------------------------------------------------------------------------------------------------------------------------------------------------------------------------------------------------------------------------------------------------------------------------------------------------------------------------------------------------------------------------------------------------------------------------------------------------------------------------------------------------------------------------------------------------------------------------------------------------------------------------------------------------------------------------------------------------------------------------------------------------------------------------------------------------------------------------------------------------------------------------------------------------------------------------------------------------------------------------------------------------------------------------------------------------------------------------------------------------------------------------------------------------------------------------------------------------------------------------------------------------------------------------------------------------------------------------------------------------------------------------------------------------------------------------------------------------------------------------------------------------------------------------------------------------------------------------------------------------------------------------------------------------------------------------------------------------------------------------------------------------------------------------------------------------------------------------------------------------------------------------------------------------------------------------------------------------------------------------------------------------------------------------------------------------------------------------------------------------------------------------------------------------------------------------------------------------------|

|      |        |                  |                                                                                                                                                                                                                                                                                                                                                                                                                                                                                                                                                                                                                                                                                                                                                                                                                                                                                                                                                                                                                                                                                                                                                                                                                                                                                                                                                                                                                                                                                                                                                                                                                                                                                                                                                                                                                                                                                                                                                                                                                                                                                                                                                                                                                                                                                                                                                                                                                                                                                                                                                  |
|------|--------|------------------|--------------------------------------------------------------------------------------------------------------------------------------------------------------------------------------------------------------------------------------------------------------------------------------------------------------------------------------------------------------------------------------------------------------------------------------------------------------------------------------------------------------------------------------------------------------------------------------------------------------------------------------------------------------------------------------------------------------------------------------------------------------------------------------------------------------------------------------------------------------------------------------------------------------------------------------------------------------------------------------------------------------------------------------------------------------------------------------------------------------------------------------------------------------------------------------------------------------------------------------------------------------------------------------------------------------------------------------------------------------------------------------------------------------------------------------------------------------------------------------------------------------------------------------------------------------------------------------------------------------------------------------------------------------------------------------------------------------------------------------------------------------------------------------------------------------------------------------------------------------------------------------------------------------------------------------------------------------------------------------------------------------------------------------------------------------------------------------------------------------------------------------------------------------------------------------------------------------------------------------------------------------------------------------------------------------------------------------------------------------------------------------------------------------------------------------------------------------------------------------------------------------------------------------------------|
|      |        |                  | Signaling TGF- $\beta$ Signaling Telomerase Signaling Thrombin Signaling Thrombopoietin Signaling VEGF Family Ligand-Receptor Interactions VEGF Signaling Xenobiotic Metabolism Signaling cAMP-mediated signaling fMLP Signaling in Neutrophils p70S6K Signaling $\alpha$ -Adrenergic Signaling                                                                                                                                                                                                                                                                                                                                                                                                                                                                                                                                                                                                                                                                                                                                                                                                                                                                                                                                                                                                                                                                                                                                                                                                                                                                                                                                                                                                                                                                                                                                                                                                                                                                                                                                                                                                                                                                                                                                                                                                                                                                                                                                                                                                                                                  |
| RCC2 | -3.057 | High (predicted) |                                                                                                                                                                                                                                                                                                                                                                                                                                                                                                                                                                                                                                                                                                                                                                                                                                                                                                                                                                                                                                                                                                                                                                                                                                                                                                                                                                                                                                                                                                                                                                                                                                                                                                                                                                                                                                                                                                                                                                                                                                                                                                                                                                                                                                                                                                                                                                                                                                                                                                                                                  |
| RELA | -1.588 | High (predicted) | 4-1BB Signaling in T Lymphocytes Activation of IRF by Cytosolic Pattern Recognition Receptors Acute Myeloid Leukemia Signaling Acute Phase Response Signaling Altered T Cell and B Cell Signaling in Rheumatoid Arthritis Androgen Signaling Angiopoietin Signaling Antioxidant Action of Vitamin C Apoptosis Signaling April Mediated Signaling Aryl Hydrocarbon Receptor Signaling Atherosclerosis Signaling B Cell Activating Factor Signaling B Cell Receptor Signaling BMP signaling pathway CD27 Signaling in Lymphocytes CD28 Signaling in T Helper Cells CD40 Signaling Ceramide Signaling Chronic Myeloid Leukemia Signaling Colorectal Cancer Metastasis Signaling Crosstalk between Dendritic Cells and Natural Killer Cells Death Receptor Signaling Dendritic Cell Maturation Erythropoietin Signaling Estrogen-Dependent Breast Cancer Signaling G-Protein Coupled Receptor Signaling GNRH Signaling Glucocorticoid Receptor Signaling G $\alpha$ 12/13 Signaling G $\alpha$ q Signaling HMGB1 Signaling Hepatic Cholestasis Hepatic Fibrosis / Hepatic Stellate Cell Activation IL-1 Signaling IL-10 Signaling IL-12 Signaling and Production in Macrophages IL-15 Production IL-15 Signaling IL-17 Signaling IL-17A Signaling in Airway Cells IL-17A Signaling in Fibroblasts IL-17A Signaling in Gastric Cells IL-6 Signaling IL-8 Signaling IL-9 Signaling ILK Signaling Induction of Apoptosis by HIV1 Interferon Signaling LPS-stimulated MAPK Signaling LXR/RXR Activation Lymphotoxin $\beta$ Receptor Signaling MIF Regulation of Innate Immunity MIF-mediated Glucocorticoid Regulation Molecular Mechanisms of Cancer NF- $\kappa$ B Activation by Viruses NF- $\kappa$ B Signaling NGF Signaling OX40 Signaling Pathway P2Y Purigenic Receptor Signaling Pathway PEDF Signaling PI3K Signaling in B Lymphocytes PI3K/AKT Signaling PKC $\theta$ Signaling in T Lymphocytes PPAR Signaling PPAR $\alpha$ /RXR $\alpha$ Activation PTEN Signaling PXR/RXR Activation Pancreatic Adenocarcinoma Signaling Phospholipase C Signaling Production of Nitric Oxide and Reactive Oxygen Species in Macrophages Prostate Cancer Signaling Protein Kinase A Signaling RANK Signaling in Osteoclasts RAR Activation Rac Signaling Regulation of IL-2 Expression in Activated and Anergic T Lymphocytes Relaxin Signaling Renin-Angiotensin Signaling Role of IL-17A in Arthritis Role of IL-17F in Allergic Inflammatory Airway Diseases Role of JAK1, JAK2 and TYK2 in Interferon Signaling Role of Macrophages, Fibroblasts and |



|         |        |                      |                                                                                                                                                                                                                                                                                                                                                                                                                                                                                                                                                                                                                                                                                                                                                                                                                                                                   |
|---------|--------|----------------------|-------------------------------------------------------------------------------------------------------------------------------------------------------------------------------------------------------------------------------------------------------------------------------------------------------------------------------------------------------------------------------------------------------------------------------------------------------------------------------------------------------------------------------------------------------------------------------------------------------------------------------------------------------------------------------------------------------------------------------------------------------------------------------------------------------------------------------------------------------------------|
|         |        |                      | Endothelial Cells in Rheumatoid Arthritis Role of NFAT in Regulation of the Immune Response Role of Osteoblasts, Osteoclasts and Chondrocytes in Rheumatoid Arthritis Role of PI3K/AKT Signaling in the Pathogenesis of Influenza Role of PKR in Interferon Induction and Antiviral Response Role of Pattern Recognition Receptors in Recognition of Bacteria and Viruses Role of RIG1-like Receptors in Antiviral Innate Immunity Signaling by Rho Family GTPases Small Cell Lung Cancer Signaling T Cell Receptor Signaling TNFR1 Signaling TNFR2 Signaling TREM1 Signaling TWEAK Signaling Thrombin Signaling Tight Junction Signaling Toll-like Receptor Signaling Type I Diabetes Mellitus Signaling Type II Diabetes Mellitus Signaling Xenobiotic Metabolism Signaling fMLP Signaling in Neutrophils iCOS-iCOSL Signaling in T Helper Cells iNOS Signaling |
| RFFL    | -1.520 | Moderate (predicted) |                                                                                                                                                                                                                                                                                                                                                                                                                                                                                                                                                                                                                                                                                                                                                                                                                                                                   |
| RNF144A | -2.581 | High (predicted)     |                                                                                                                                                                                                                                                                                                                                                                                                                                                                                                                                                                                                                                                                                                                                                                                                                                                                   |
| RNF20   | -1.551 | High (predicted)     |                                                                                                                                                                                                                                                                                                                                                                                                                                                                                                                                                                                                                                                                                                                                                                                                                                                                   |
| RPL15   | -2.029 | Moderate (predicted) | EIF2 Signaling                                                                                                                                                                                                                                                                                                                                                                                                                                                                                                                                                                                                                                                                                                                                                                                                                                                    |
| RSBN1   | -1.523 | High (predicted)     |                                                                                                                                                                                                                                                                                                                                                                                                                                                                                                                                                                                                                                                                                                                                                                                                                                                                   |
| RUSC1   | -3.261 | Moderate (predicted) |                                                                                                                                                                                                                                                                                                                                                                                                                                                                                                                                                                                                                                                                                                                                                                                                                                                                   |
| RYK     | -1.612 | High (predicted)     | Role of Macrophages, Fibroblasts and Endothelial Cells in Rheumatoid Arthritis                                                                                                                                                                                                                                                                                                                                                                                                                                                                                                                                                                                                                                                                                                                                                                                    |
| SCARB2  | -3.528 | Moderate (predicted) |                                                                                                                                                                                                                                                                                                                                                                                                                                                                                                                                                                                                                                                                                                                                                                                                                                                                   |
| SDHC    | -1.845 | Moderate (predicted) | Mitochondrial Dysfunction TCA Cycle II (Eukaryotic)                                                                                                                                                                                                                                                                                                                                                                                                                                                                                                                                                                                                                                                                                                                                                                                                               |
| SEPT2   | -1.822 | Moderate (predicted) | RhoA Signaling Signaling by Rho Family GTPases                                                                                                                                                                                                                                                                                                                                                                                                                                                                                                                                                                                                                                                                                                                                                                                                                    |
| SEPW1   | -2.584 | Moderate (predicted) |                                                                                                                                                                                                                                                                                                                                                                                                                                                                                                                                                                                                                                                                                                                                                                                                                                                                   |
| SERP1   | -1.589 | High (predicted)     |                                                                                                                                                                                                                                                                                                                                                                                                                                                                                                                                                                                                                                                                                                                                                                                                                                                                   |

|          |        |                                          |                                                                                                                                                                                                                                                                                                                                                                                                                                                                                                                                                                                                                                                                                                                                                |
|----------|--------|------------------------------------------|------------------------------------------------------------------------------------------------------------------------------------------------------------------------------------------------------------------------------------------------------------------------------------------------------------------------------------------------------------------------------------------------------------------------------------------------------------------------------------------------------------------------------------------------------------------------------------------------------------------------------------------------------------------------------------------------------------------------------------------------|
| SETD8    | -1.716 | High (predicted)                         |                                                                                                                                                                                                                                                                                                                                                                                                                                                                                                                                                                                                                                                                                                                                                |
| SIGMAR1  | -2.718 | Moderate (predicted)                     |                                                                                                                                                                                                                                                                                                                                                                                                                                                                                                                                                                                                                                                                                                                                                |
| SKP1     | -2.755 | High (predicted)                         | Antiproliferative Role of TOB in T Cell Signaling Cell Cycle: G1/S Checkpoint Regulation Cell Cycle: G2/M DNA Damage Checkpoint Regulation Cyclins and Cell Cycle Regulation Protein Ubiquitination Pathway                                                                                                                                                                                                                                                                                                                                                                                                                                                                                                                                    |
| SLC25A15 | -2.652 | High (predicted)                         |                                                                                                                                                                                                                                                                                                                                                                                                                                                                                                                                                                                                                                                                                                                                                |
| SLC2A10  | -2.033 | Moderate (predicted)                     |                                                                                                                                                                                                                                                                                                                                                                                                                                                                                                                                                                                                                                                                                                                                                |
| SLC35A5  | -1.901 | Moderate (predicted)                     |                                                                                                                                                                                                                                                                                                                                                                                                                                                                                                                                                                                                                                                                                                                                                |
| SMARCD1  | -3.597 | High (predicted)                         |                                                                                                                                                                                                                                                                                                                                                                                                                                                                                                                                                                                                                                                                                                                                                |
| SMO      | -1.533 | Moderate (predicted)                     | Axonal Guidance Signaling Basal Cell Carcinoma Signaling Colorectal Cancer Metastasis Signaling Corticotropin Releasing Hormone Signaling Factors Promoting Cardiogenesis in Vertebrates Glioblastoma Multiforme Signaling Human Embryonic Stem Cell Pluripotency Molecular Mechanisms of Cancer Mouse Embryonic Stem Cell Pluripotency Ovarian Cancer Signaling Protein Kinase A Signaling Role of Macrophages, Fibroblasts and Endothelial Cells in Rheumatoid Arthritis Role of NANOG in Mammalian Embryonic Stem Cell Pluripotency Role of Osteoblasts, Osteoclasts and Chondrocytes in Rheumatoid Arthritis Role of Wnt/GSK-3 $\beta$ Signaling in the Pathogenesis of Influenza Sonic Hedgehog Signaling Wnt/ $\beta$ -catenin Signaling |
| SNAP29   | -2.284 | Moderate (predicted)                     |                                                                                                                                                                                                                                                                                                                                                                                                                                                                                                                                                                                                                                                                                                                                                |
| SNCA     | -1.927 | Experimentally Observed,High (predicted) | 14-3-3-mediated Signaling Huntington's Disease Signaling Mitochondrial Dysfunction Parkinson's Signaling                                                                                                                                                                                                                                                                                                                                                                                                                                                                                                                                                                                                                                       |
| SORT1    | -1.593 | High (predicted)                         |                                                                                                                                                                                                                                                                                                                                                                                                                                                                                                                                                                                                                                                                                                                                                |
| SP1      | -1.566 | High (predicted)                         | Aryl Hydrocarbon Receptor Signaling ErbB2-ErbB3 Signaling Estrogen-Dependent Breast Cancer Signaling Gap Junction Signaling HMGB1 Signaling Huntington's Disease Signaling IL-10 Signaling Prolactin Signaling Telomerase Signaling VDR/RXR Activation                                                                                                                                                                                                                                                                                                                                                                                                                                                                                         |

|          |        |                      |                                                                                                                                                                                                                 |
|----------|--------|----------------------|-----------------------------------------------------------------------------------------------------------------------------------------------------------------------------------------------------------------|
| SPTY2D1  | -1.591 | High (predicted)     |                                                                                                                                                                                                                 |
| SRGAP2   | -1.662 | High (predicted)     | Axonal Guidance Signaling                                                                                                                                                                                       |
| ST8SIA5  | -1.615 | Moderate (predicted) |                                                                                                                                                                                                                 |
| STMN3    | -1.928 | Moderate (predicted) |                                                                                                                                                                                                                 |
| TBC1D2B  | -1.888 | Moderate (predicted) |                                                                                                                                                                                                                 |
| TCF12    | -1.841 | High (predicted)     | PEDF Signaling                                                                                                                                                                                                  |
| TGFA     | -1.553 | Moderate (predicted) | ErbB Signaling Hepatic Fibrosis / Hepatic Stellate Cell Activation NF-κB Signaling Neuregulin Signaling Non-Small Cell Lung Cancer Signaling Pancreatic Adenocarcinoma Signaling Renal Cell Carcinoma Signaling |
| TMED9    | -2.911 | High (predicted)     |                                                                                                                                                                                                                 |
| TMEM43   | -3.682 | Moderate (predicted) |                                                                                                                                                                                                                 |
| TMEM69   | -2.069 | Moderate (predicted) |                                                                                                                                                                                                                 |
| TMEM97   | -3.435 | Moderate (predicted) |                                                                                                                                                                                                                 |
| C18orf10 | -3.952 | Moderate (predicted) |                                                                                                                                                                                                                 |
| UBE2D4   | -2.132 | Moderate (predicted) | Hypoxia Signaling in the Cardiovascular System Protein Ubiquitination Pathway                                                                                                                                   |
| UBE2J1   | -1.980 | Moderate (predicted) | Hypoxia Signaling in the Cardiovascular System Protein Ubiquitination Pathway                                                                                                                                   |
| UBQLN4   | -3.029 | High (predicted)     |                                                                                                                                                                                                                 |
| UBXN2B   | -1.857 | High (predicted)     |                                                                                                                                                                                                                 |
| UHRF1    | -2.029 | High (predicted)     |                                                                                                                                                                                                                 |

|        |        |                      |  |
|--------|--------|----------------------|--|
| VDAC1  | -1.798 | High (predicted)     |  |
| VPS26A | -3.110 | High (predicted)     |  |
| ZDHHC9 | -2.995 | High (predicted)     |  |
| ZMIZ1  | -2.428 | High (predicted)     |  |
| ZNF275 | -1.667 | Moderate (predicted) |  |
