# Supplementary material for: microRNA-7-5p inhibits melanoma cell proliferation and metastasis by suppressing RelA/NF-κB
Source: PubMed Central journal article supplement (PMC5077967; doi:10.18632/oncotarget.9421), 2016-05-17
Supplement: oncotarget-07-31663-s005.pdf [file oncotarget-07-31663-s005.pdf]

**Supplementary Table S4. Functional pathways enriched for genes downregulated with miR-7-5p in WM266-4 cells.**

| Category             | Function                  | Function Annotation       | p-value  | Molecules                                                                                                                                                                                                                                                                                    | #  |
|----------------------|---------------------------|---------------------------|----------|----------------------------------------------------------------------------------------------------------------------------------------------------------------------------------------------------------------------------------------------------------------------------------------------|----|
| Neurological Disease | disorder of basal ganglia | disorder of basal ganglia | 8.98E-05 | CAMKK2, CASP2, CDK5R1, DBNL, DHCR7, DPYSL3, EMX2, ENO2, ETV4, FGF13, GIT1, HSPA5, ITPKB, MICALL1, MT1X, MT2A, NOTCH2, NRGN, PAK1, PFN2, PNKD, PPARGC1A, PPRC1, RELA, RGS4, RNF114, RNF5, RPL15, SCARB2, SDC4, SETDB1, SH3BP4, SLC20A2, SNCA, SORT1, SRM, STOM, TGM2, TMED10, TRAK2, UBE2D4   | 41 |
| Neurological Disease | movement disorder         | Movement Disorders        | 6.32E-04 | CAMKK2, CASP2, CDK5R1, DBNL, DHCR7, DPYSL3, EMX2, ENO2, ETV4, FGF13, GIT1, HSPA5, ITPKB, LINGO1, MICALL1, MT1X, MT2A, NOTCH2, NRGN, PAK1, PFN2, PPARGC1A, PPRC1, RELA, RGS4, RNF114, RNF5, RPL15, SCARB2, SDC4, SETDB1, SH3BP4, SIGMAR1, SNCA, SORT1, SRM, STOM, TGM2, TMED10, TRAK2, UBE2D4 | 41 |
| Neurological Disease | Wolfram Syndrome          | Wolfram Syndrome          | 7.65E-04 | CISD2, WFS1                                                                                                                                                                                                                                                                                  | 2  |
| Neurological Disease | Huntington's disease      | Huntington's Disease      | 1.31E-03 | CAMKK2, CASP2, CDK5R1, DHCR7, DPYSL3, EMX2, ETV4, FGF13, GIT1, HSPA5, ITPKB, MICALL1, MT1X, MT2A, NOTCH2, NRGN, PFN2, PPARGC1A, PPRC1, RGS4, SCARB2, SDC4, SETDB1, SH3BP4, SORT1, SRM, STOM, TGM2, TRAK2, UBE2D4                                                                             | 30 |
| Neurological Disease | neuromuscular disease     | neuromuscular disease     | 2.14E-03 | CAMKK2, CASP2, CDK5R1, DBNL, DHCR7, DPYSL3, EMX2, ENO2, ETV4, FGF13, GIT1, HSPA5, ITPKB, MICALL1, MT1X, MT2A, MX1, NOTCH2, NRGN, PAK1, PFN2, PPARGC1A, PPRC1, RELA, RGS4, RNF114, RNF5, RPL15, SCARB2, SDC4, SETDB1, SH3BP4, SNCA, SORT1, SRM, STOM, TGM2, TMED10, TRAK2, UBE2D4             | 40 |
| Neurological Disease | Krabbe's disease          | Krabbe's disease          | 4.42E-03 | CAV1, FLOT2                                                                                                                                                                                                                                                                                  | 2  |
| Neurological         | hydrocephalus             | hydrocephalus             | 1.46E-02 | ENO2, L1CAM                                                                                                                                                                                                                                                                                  | 2  |

|                      |                                                                                                     |                                                                                                     |          |             |   |
|----------------------|-----------------------------------------------------------------------------------------------------|-----------------------------------------------------------------------------------------------------|----------|-------------|---|
| Disease              |                                                                                                     |                                                                                                     |          |             |   |
| Neurological Disease | encephalopathy                                                                                      | autosomal dominant encephalopathy                                                                   | 1.92E-02 | PSEN2, SNCA | 2 |
| Neurological Disease | Alzheimer's disease type 4                                                                          | Alzheimer's disease type 4                                                                          | 2.77E-02 | PSEN2       | 1 |
| Neurological Disease | Amish lethal microcephaly                                                                           | Amish lethal microcephaly                                                                           | 2.77E-02 | SLC25A19    | 1 |
| Neurological Disease | CRASH syndrome                                                                                      | CRASH syndrome                                                                                      | 2.77E-02 | L1CAM       | 1 |
| Neurological Disease | Charcot-Marie-Tooth disease axonal type 1c                                                          | Charcot-Marie-Tooth disease axonal type 1c                                                          | 2.77E-02 | LITAF       | 1 |
| Neurological Disease | Parkinson disease 1                                                                                 | Parkinson disease 1                                                                                 | 2.77E-02 | SNCA        | 1 |
| Neurological Disease | X-linked hydrocephalus with congenital idiopathic intestinal pseudoobstruction                      | X-linked hydrocephalus with congenital idiopathic intestinal pseudoobstruction                      | 2.77E-02 | L1CAM       | 1 |
| Neurological Disease | amish infantile epilepsy syndrome                                                                   | amish infantile epilepsy syndrome                                                                   | 2.77E-02 | ST3GAL5     | 1 |
| Neurological Disease | autosomal dominant Parkinson disease 4                                                              | autosomal dominant Parkinson disease 4                                                              | 2.77E-02 | SNCA        | 1 |
| Neurological Disease | bilateral frontoparietal polymicrogyria                                                             | bilateral frontoparietal polymicrogyria                                                             | 2.77E-02 | GPR56       | 1 |
| Neurological Disease | cerebral dysgenesis, neuropathy, ichthyosis, and palmoplantar keratoderma syndrome, cednik syndrome | cerebral dysgenesis, neuropathy, ichthyosis, and palmoplantar keratoderma syndrome, cednik syndrome | 2.77E-02 | SNAP29      | 1 |
| Neurological Disease | creatine deficiency syndrome                                                                        | creatine deficiency syndrome                                                                        | 2.77E-02 | SLC6A8      | 1 |
| Neurological Disease | idiopathic basal ganglia calcification type 3                                                       | idiopathic basal ganglia calcification type 3                                                       | 2.77E-02 | SLC20A2     | 1 |
| Neurological Disease | juvenile amyotrophic lateral sclerosis type 16                                                      | juvenile amyotrophic lateral sclerosis type 16                                                      | 2.77E-02 | SIGMAR1     | 1 |

|                      |                                                       |                                                       |          |                                                                                                                                                                                |    |
|----------------------|-------------------------------------------------------|-------------------------------------------------------|----------|--------------------------------------------------------------------------------------------------------------------------------------------------------------------------------|----|
| Neurological Disease | mucopolysaccharidosi s type VI                        | mucopolysaccharidosis type VI                         | 2.77E-02 | ARSB                                                                                                                                                                           | 1  |
| Neurological Disease | nonsyndromic low frequency sensorineural hearing loss | nonsyndromic low frequency sensorineural hearing loss | 2.77E-02 | WFS1                                                                                                                                                                           | 1  |
| Neurological Disease | paroxysmal choreoathetosis                            | paroxysmal choreoathetosis                            | 2.77E-02 | PNKD                                                                                                                                                                           | 1  |
| Neurological Disease | partial agenesis of corpus callosum                   | partial agenesis of corpus callosum                   | 2.77E-02 | L1CAM                                                                                                                                                                          | 1  |
| Cellular Movement    | migration                                             | migration of adenocarcinoma cell lines                | 7.65E-04 | TGFA, TGM2                                                                                                                                                                     | 2  |
| Cellular Movement    | migration                                             | migration of lung cancer cell lines                   | 4.00E-03 | CAV1, ETV4, PTK2, STMN3, TGFA, TGM2                                                                                                                                            | 6  |
| Cellular Movement    | migration                                             | migration of tumor cell lines                         | 9.62E-03 | ACSL4, AGK, ANKS1A, CAV1, CMTM8, DPYSL2, ELK1, ETV4, FOXO3, GAB2, GIT1, L1CAM, MITF, NOTCH2, PAK1, PAK2, PLXNA1, PTK2, RNF144A, SIRPA, ST6GAL1, STMN3, TCF12, TGFA, TGM2, WBP2 | 26 |
| Cellular Movement    | migration                                             | migration of breast cancer cell lines                 | 1.04E-02 | ACSL4, ANKS1A, FOXO3, GAB2, PAK1, PAK2, PLXNA1, PTK2, RNF144A, TGFA, WBP2                                                                                                      | 11 |
| Cellular Movement    | migration                                             | migration of hepatoma cell lines                      | 3.06E-02 | CAV1, CMTM8, ELK1, PAK1                                                                                                                                                        | 4  |
| Cellular Movement    | migration                                             | migration of carcinoma cells                          | 3.57E-02 | GNA12, PAK1                                                                                                                                                                    | 2  |
| Cellular Movement    | migration                                             | migration of vascular smooth muscle cells             | 4.93E-02 | CLIC4, GIT1, SDC4                                                                                                                                                              | 3  |
| Cellular Movement    | cell movement                                         | cell movement of tumor cells                          | 1.42E-03 | CAV1, CBL, GNA12, L1CAM, PAK1, PTK2, SIRPA                                                                                                                                     | 7  |
| Cellular Movement    | cell movement                                         | cell movement of carcinoma cells                      | 4.90E-03 | GNA12, L1CAM, PAK1                                                                                                                                                             | 3  |
| Cellular Movement    | cell movement                                         | cell movement of cancer cells                         | 1.42E-02 | CAV1, GNA12, L1CAM, PAK1, SIRPA                                                                                                                                                | 5  |
| Cellular Movement    | cell movement                                         | cell movement of breast cancer cell lines             | 1.52E-02 | ACSL4, ANKS1A, FOXO3, GAB2, L1CAM, PAK1, PAK2, PLXNA1, PTK2, RNF144A, TGFA, WBP2                                                                                               | 12 |
| Cellular Movement    | cell movement                                         | cell movement of vascular smooth muscle cells         | 1.54E-02 | CLIC4, GIT1, SDC4, TRIB1                                                                                                                                                       | 4  |
| Cellular             | cell movement                                         | cell movement of colon carcinoma cells                | 2.77E-02 | L1CAM                                                                                                                                                                          | 1  |

|                     |                                         |                                            |          |                                                                                                                                                                                                                  |    |
|---------------------|-----------------------------------------|--------------------------------------------|----------|------------------------------------------------------------------------------------------------------------------------------------------------------------------------------------------------------------------|----|
| Movement            |                                         |                                            |          |                                                                                                                                                                                                                  |    |
| Cellular Movement   | cell movement                           | cell movement of melanoma cell lines       | 4.21E-02 | FOXO3, L1CAM, MITF, MX1, PAK1                                                                                                                                                                                    | 5  |
| Cellular Movement   | cell movement                           | cell movement of tumor cell lines          | 4.34E-02 | ACSL4, AGK, ANKS1A, CAV1, CMTM8, DPYSL2, ELK1, ETV4, FOXO3, GAB2, GIT1, L1CAM, MITF, MX1, NOTCH2, PAK1, PAK2, PLXNA1, PTK2, RNF144A, SIRPA, ST3GAL5, ST6GAL1, STMN3, TCF12, TGFA, TGM2, WBP2                     | 28 |
| Cellular Movement   | invasion                                | invasion of tumor cell lines               | 2.94E-03 | ACSL4, CAV1, CBL, CDK5R1, CMTM8, CTSK, ELK1, ETV4, FXYD5, GAB2, GNA12, IRS2, L1CAM, MITF, MX1, PAK1, PIK3R2, PTK2, RELA, RNF144A, SDC4, SKP2, SP1, TCF12, TGFA, TIMP3                                            | 26 |
| Cellular Movement   | invasion                                | invasion of breast cancer cell lines       | 9.18E-03 | ACSL4, CAV1, CBL, CTSK, FXYD5, GAB2, IRS2, PAK1, PTK2, RELA, RNF144A                                                                                                                                             | 11 |
| Cellular Movement   | invasion                                | invasion of cells                          | 9.51E-03 | ACSL4, CAV1, CBL, CDK5R1, CMTM8, CTSK, ELK1, ETV4, FXYD5, GAB2, GNA12, IRS2, L1CAM, MITF, MX1, PAK1, PIK3R2, PTK2, RELA, RGS4, RNF144A, SDC4, SKP2, SP1, TCF12, TGFA, TIMP3                                      | 27 |
| Cellular Movement   | invasion                                | invasion of nasopharyngeal carcinoma cells | 2.77E-02 | GNA12                                                                                                                                                                                                            | 1  |
| Cellular Movement   | chemotaxis                              | chemotaxis of mammary tumor cells          | 2.77E-02 | CBL                                                                                                                                                                                                              | 1  |
| Cellular Movement   | contact repulsion                       | contact repulsion of axons                 | 2.77E-02 | L1CAM                                                                                                                                                                                                            | 1  |
| Hereditary Disorder | Wolfram Syndrome                        | Wolfram Syndrome                           | 7.65E-04 | CISD2, WFS1                                                                                                                                                                                                      | 2  |
| Hereditary Disorder | inborn error of carbohydrate metabolism | inborn error of carbohydrate metabolism    | 9.83E-04 | ALG3, ARSB, DOLK, GALE, GNPTAB, MGAT2, MPDU1, NEU1                                                                                                                                                               | 8  |
| Hereditary Disorder | Huntington's disease                    | Huntington's Disease                       | 1.31E-03 | CAMKK2, CASP2, CDK5R1, DHCR7, DPYSL3, EMX2, ETV4, FGF13, GIT1, HSPA5, ITPKB, MICALL1, MT1X, MT2A, NOTCH2, NRG1, PFN2, PPARGC1A, PPRC1, RGS4, SCARB2, SDC4, SETDB1, SH3BP4, SORT1, SRM, STOM, TGM2, TRAK2, UBE2D4 | 30 |
| Hereditary Disorder | osteogenesis imperfecta type II         | osteogenesis imperfecta type II            | 2.25E-03 | COL1A2, CRTAP                                                                                                                                                                                                    | 2  |
| Hereditary          | Krabbe's disease                        | Krabbe's disease                           | 4.42E-03 | CAV1, FLOT2                                                                                                                                                                                                      | 2  |

|                     |                                                                                |                                                                                |          |                          |   |
|---------------------|--------------------------------------------------------------------------------|--------------------------------------------------------------------------------|----------|--------------------------|---|
| Disorder            |                                                                                |                                                                                |          |                          |   |
| Hereditary Disorder | Ehlers-Danlos syndrome                                                         | Ehlers-Danlos syndrome                                                         | 4.90E-03 | B4GALT7, COL1A2, PLOD1   | 3 |
| Hereditary Disorder | congenital disorders of glycosylation                                          | congenital disorders of glycosylation                                          | 8.98E-03 | ALG3, DOLK, MGAT2, MPDU1 | 4 |
| Hereditary Disorder | mucopolysaccharidoses                                                          | mucopolysaccharidoses                                                          | 9.02E-03 | ARSB, GNPTAB, NEU1       | 3 |
| Hereditary Disorder | Alagille syndrome 2                                                            | Alagille syndrome 2                                                            | 2.77E-02 | NOTCH2                   | 1 |
| Hereditary Disorder | Alzheimer's disease type 4                                                     | Alzheimer's disease type 4                                                     | 2.77E-02 | PSEN2                    | 1 |
| Hereditary Disorder | CRASH syndrome                                                                 | CRASH syndrome                                                                 | 2.77E-02 | L1CAM                    | 1 |
| Hereditary Disorder | Charcot-Marie-Tooth disease axonal type 1c                                     | Charcot-Marie-Tooth disease axonal type 1c                                     | 2.77E-02 | LITAF                    | 1 |
| Hereditary Disorder | Hailey-Hailey disease                                                          | Hailey-Hailey disease                                                          | 2.77E-02 | ATP2C1                   | 1 |
| Hereditary Disorder | Methylmalonic aciduria and homocystinuria cblC type                            | Methylmalonic aciduria and homocystinuria cblC type                            | 2.77E-02 | MMACHC                   | 1 |
| Hereditary Disorder | Parkinson disease 1                                                            | Parkinson disease 1                                                            | 2.77E-02 | SNCA                     | 1 |
| Hereditary Disorder | Schnyder crystalline corneal dystrophy                                         | Schnyder crystalline corneal dystrophy                                         | 2.77E-02 | UBIAD1                   | 1 |
| Hereditary Disorder | Smith-Lemli-Opitz syndrome                                                     | Smith-Lemli-Opitz syndrome                                                     | 2.77E-02 | DHCR7                    | 1 |
| Hereditary Disorder | Smith-McCort dysplasia                                                         | Smith-McCort dysplasia                                                         | 2.77E-02 | DYM                      | 1 |
| Hereditary Disorder | Wiskott-Aldrich syndrome type 2                                                | Wiskott-Aldrich syndrome type 2                                                | 2.77E-02 | WIPF1                    | 1 |
| Hereditary Disorder | X-linked hydrocephalus with congenital idiopathic intestinal pseudoobstruction | X-linked hydrocephalus with congenital idiopathic intestinal pseudoobstruction | 2.77E-02 | L1CAM                    | 1 |
| Hereditary Disorder | agammaglobulinemia type 5                                                      | agammaglobulinemia type 5                                                      | 2.77E-02 | LRRC8A                   | 1 |
| Hereditary Disorder | albinism-deafness                                                              | albinism-deafness syndrome of tietz                                            | 2.77E-02 | MITF                     | 1 |

|                     |                                                                                                     |                                                                                                     |          |         |   |
|---------------------|-----------------------------------------------------------------------------------------------------|-----------------------------------------------------------------------------------------------------|----------|---------|---|
| Disorder            | syndrome of tietz                                                                                   |                                                                                                     |          |         |   |
| Hereditary Disorder | amish infantile epilepsy syndrome                                                                   | amish infantile epilepsy syndrome                                                                   | 2.77E-02 | ST3GAL5 | 1 |
| Hereditary Disorder | arterial tortuosity syndrome                                                                        | arterial tortuosity syndrome                                                                        | 2.77E-02 | SLC2A10 | 1 |
| Hereditary Disorder | autosomal dominant Parkinson disease 4                                                              | autosomal dominant Parkinson disease 4                                                              | 2.77E-02 | SNCA    | 1 |
| Hereditary Disorder | bilateral frontoparietal polymicrogyria                                                             | bilateral frontoparietal polymicrogyria                                                             | 2.77E-02 | GPR56   | 1 |
| Hereditary Disorder | cerebral dysgenesis, neuropathy, ichthyosis, and palmoplantar keratoderma syndrome, cednik syndrome | cerebral dysgenesis, neuropathy, ichthyosis, and palmoplantar keratoderma syndrome, cednik syndrome | 2.77E-02 | SNAP29  | 1 |
| Hereditary Disorder | congenital disorder of glycosylation type 1d                                                        | congenital disorder of glycosylation type 1d                                                        | 2.77E-02 | ALG3    | 1 |
| Hereditary Disorder | congenital disorder of glycosylation type 1f                                                        | congenital disorder of glycosylation type 1f                                                        | 2.77E-02 | MPDU1   | 1 |
| Hereditary Disorder | congenital disorder of glycosylation type 1m                                                        | congenital disorder of glycosylation type 1m                                                        | 2.77E-02 | DOLK    | 1 |
| Hereditary Disorder | congenital disorders of glycosylation type 2a                                                       | congenital disorders of glycosylation type 2a                                                       | 2.77E-02 | MGAT2   | 1 |
| Hereditary Disorder | congenital generalized lipodystrophy type 3                                                         | congenital generalized lipodystrophy type 3                                                         | 2.77E-02 | CAV1    | 1 |
| Hereditary Disorder | creatine deficiency syndrome                                                                        | creatine deficiency syndrome                                                                        | 2.77E-02 | SLC6A8  | 1 |
| Hereditary Disorder | desmosterolosis                                                                                     | desmosterolosis                                                                                     | 2.77E-02 | DHCR24  | 1 |
| Hereditary Disorder | dyggve-melchior-clausen syndrome                                                                    | dyggve-melchior-clausen syndrome                                                                    | 2.77E-02 | DYM     | 1 |
| Hereditary Disorder | epidermolysis bullosa simplex with muscular dystrophy                                               | epidermolysis bullosa simplex with muscular dystrophy                                               | 2.77E-02 | PLEC    | 1 |
| Hereditary Disorder | epidermolysis bullosa simplex, ogna type                                                            | epidermolysis bullosa simplex, ogna type                                                            | 2.77E-02 | PLEC    | 1 |
| Hereditary Disorder | idiopathic basal ganglia calcification                                                              | idiopathic basal ganglia calcification type 3                                                       | 2.77E-02 | SLC20A2 | 1 |

|                     |                                                                |                                                       |          |                                                    |   |
|---------------------|----------------------------------------------------------------|-------------------------------------------------------|----------|----------------------------------------------------|---|
|                     | type 3                                                         |                                                       |          |                                                    |   |
| Hereditary Disorder | mucopolysaccharidosi<br>s type VI                              | mucopolysaccharidosis type VI                         | 2.77E-02 | ARSB                                               | 1 |
| Hereditary Disorder | nonsyndromic low<br>frequency<br>sensorineural hearing<br>loss | nonsyndromic low frequency sensorineural hearing loss | 2.77E-02 | WFS1                                               | 1 |
| Hereditary Disorder | osteogenesis<br>imperfecta type IIB                            | osteogenesis imperfecta type IIB                      | 2.77E-02 | CRTAP                                              | 1 |
| Hereditary Disorder | overhydrated<br>hereditary<br>stomatocytosis                   | overhydrated hereditary stomatocytosis                | 2.77E-02 | STOM                                               | 1 |
| Hereditary Disorder | progeroid form Ehlers-<br>Danlos syndrome                      | progeroid form Ehlers-Danlos syndrome                 | 2.77E-02 | B4GALT7                                            | 1 |
| Hereditary Disorder | pseudo-hurler<br>polydystrophy                                 | pseudo-hurler polydystrophy                           | 2.77E-02 | GNPTAB                                             | 1 |
| Hereditary Disorder | pyknodysostosis                                                | pyknodysostosis                                       | 2.77E-02 | CTSK                                               | 1 |
| Hereditary Disorder | udpoglucose-4-<br>epimerase deficiency                         | udpoglucose-4-epimerase deficiency                    | 2.77E-02 | GALE                                               | 1 |
| Hereditary Disorder | lysosomal storage<br>disease                                   | lysosomal storage disease                             | 3.01E-02 | ARSB, CAV1, FLOT2, GNPTAB, NEU1                    | 5 |
| Metabolic Disease   | Wolfram Syndrome                                               | Wolfram Syndrome                                      | 7.65E-04 | CISD2, WFS1                                        | 2 |
| Metabolic Disease   | inborn error of<br>carbohydrate<br>metabolism                  | inborn error of carbohydrate metabolism               | 9.83E-04 | ALG3, ARSB, DOLK, GALE, GNPTAB, MGAT2, MPDU1, NEU1 | 8 |
| Metabolic Disease   | osteogenesis<br>imperfecta type II                             | osteogenesis imperfecta type II                       | 2.25E-03 | COL1A2, CRTAP                                      | 2 |
| Metabolic Disease   | Krabbe's disease                                               | Krabbe's disease                                      | 4.42E-03 | CAV1, FLOT2                                        | 2 |
| Metabolic Disease   | Ehlers-Danlos<br>syndrome                                      | Ehlers-Danlos syndrome                                | 4.90E-03 | B4GALT7, COL1A2, PLOD1                             | 3 |
| Metabolic Disease   | congenital disorders of<br>glycosylation                       | congenital disorders of glycosylation                 | 8.98E-03 | ALG3, DOLK, MGAT2, MPDU1                           | 4 |
| Metabolic Disease   | mucopolysaccharidose<br>s                                      | mucopolysaccharidoses                                 | 9.02E-03 | ARSB, GNPTAB, NEU1                                 | 3 |
| Metabolic           | metabolic bone                                                 | metabolic bone disease                                | 2.41E-02 | B4GALT7, COL1A2, CRTAP, PLOD1                      | 4 |

|                    |                                                     |                                                     |          |                                                                          |    |
|--------------------|-----------------------------------------------------|-----------------------------------------------------|----------|--------------------------------------------------------------------------|----|
| Disease            | disease                                             |                                                     |          |                                                                          |    |
| Metabolic Disease  | Methylmalonic aciduria and homocystinuria cblC type | Methylmalonic aciduria and homocystinuria cblC type | 2.77E-02 | MMACHC                                                                   | 1  |
| Metabolic Disease  | Smith-Lemli-Opitz syndrome                          | Smith-Lemli-Opitz syndrome                          | 2.77E-02 | DHCR7                                                                    | 1  |
| Metabolic Disease  | albinism-deafness syndrome of tietz                 | albinism-deafness syndrome of tietz                 | 2.77E-02 | MITF                                                                     | 1  |
| Metabolic Disease  | alkalinization                                      | alkalinization of fibroblasts                       | 2.77E-02 | SLC9A1                                                                   | 1  |
| Metabolic Disease  | congenital disorder of glycosylation type 1d        | congenital disorder of glycosylation type 1d        | 2.77E-02 | ALG3                                                                     | 1  |
| Metabolic Disease  | congenital disorder of glycosylation type 1f        | congenital disorder of glycosylation type 1f        | 2.77E-02 | MPDU1                                                                    | 1  |
| Metabolic Disease  | congenital disorder of glycosylation type 1m        | congenital disorder of glycosylation type 1m        | 2.77E-02 | DOLK                                                                     | 1  |
| Metabolic Disease  | congenital disorders of glycosylation type 2a       | congenital disorders of glycosylation type 2a       | 2.77E-02 | MGAT2                                                                    | 1  |
| Metabolic Disease  | creatine deficiency syndrome                        | creatine deficiency syndrome                        | 2.77E-02 | SLC6A8                                                                   | 1  |
| Metabolic Disease  | desmosterolosis                                     | desmosterolosis                                     | 2.77E-02 | DHCR24                                                                   | 1  |
| Metabolic Disease  | mucopolysaccharidosi s type VI                      | mucopolysaccharidosis type VI                       | 2.77E-02 | ARSB                                                                     | 1  |
| Metabolic Disease  | osteogenesis imperfecta type IIB                    | osteogenesis imperfecta type IIB                    | 2.77E-02 | CRTAP                                                                    | 1  |
| Metabolic Disease  | progeroid form Ehlers-Danlos syndrome               | progeroid form Ehlers-Danlos syndrome               | 2.77E-02 | B4GALT7                                                                  | 1  |
| Metabolic Disease  | pseudo-hurler polydystrophy                         | pseudo-hurler polydystrophy                         | 2.77E-02 | GNPTAB                                                                   | 1  |
| Metabolic Disease  | udp glucose-4-epimerase deficiency                  | udp glucose-4-epimerase deficiency                  | 2.77E-02 | GALE                                                                     | 1  |
| Metabolic Disease  | lysosomal storage disease                           | lysosomal storage disease                           | 3.01E-02 | ARSB, CAV1, FLOT2, GNPTAB, NEU1                                          | 5  |
| Metabolic Disease  | insulin-dependent diabetes mellitus                 | insulin-dependent diabetes mellitus                 | 4.52E-02 | AGPAT1, COL1A2, DYM, HCP5, HMG4, PPP1R11, RAB5B, RNF5, RSN1, SH2B3, WFS1 | 11 |
| Ophthalmic Disease | Wolfram Syndrome                                    | Wolfram Syndrome                                    | 7.65E-04 | CISD2, WFS1                                                              | 2  |



|                        |                                                                                |                                                                                |          |                                                    |   |
|------------------------|--------------------------------------------------------------------------------|--------------------------------------------------------------------------------|----------|----------------------------------------------------|---|
| Ophthalmic Disease     | Schnyder crystalline corneal dystrophy                                         | Schnyder crystalline corneal dystrophy                                         | 2.77E-02 | UBIAD1                                             | 1 |
| Developmental Disorder | inborn error of carbohydrate metabolism                                        | inborn error of carbohydrate metabolism                                        | 9.83E-04 | ALG3, ARSB, DOLK, GALE, GNPTAB, MGAT2, MPDU1, NEU1 | 8 |
| Developmental Disorder | osteogenesis imperfecta type II                                                | osteogenesis imperfecta type II                                                | 2.25E-03 | COL1A2, CRTAP                                      | 2 |
| Developmental Disorder | Krabbe's disease                                                               | Krabbe's disease                                                               | 4.42E-03 | CAV1, FLOT2                                        | 2 |
| Developmental Disorder | Ehlers-Danlos syndrome                                                         | Ehlers-Danlos syndrome                                                         | 4.90E-03 | B4GALT7, COL1A2, PLOD1                             | 3 |
| Developmental Disorder | congenital disorders of glycosylation                                          | congenital disorders of glycosylation                                          | 8.98E-03 | ALG3, DOLK, MGAT2, MPDU1                           | 4 |
| Developmental Disorder | mucopolysaccharidoses                                                          | mucopolysaccharidoses                                                          | 9.02E-03 | ARSB, GNPTAB, NEU1                                 | 3 |
| Developmental Disorder | arrhythmogenic right ventricular dysplasia                                     | arrhythmogenic right ventricular dysplasia                                     | 2.42E-02 | DSG2, TMEM43                                       | 2 |
| Developmental Disorder | Alagille syndrome 2                                                            | Alagille syndrome 2                                                            | 2.77E-02 | NOTCH2                                             | 1 |
| Developmental Disorder | Hajdu-Cheney syndrome                                                          | Hajdu-Cheney syndrome                                                          | 2.77E-02 | NOTCH2                                             | 1 |
| Developmental Disorder | Methylmalonic aciduria and homocystinuria cblC type                            | Methylmalonic aciduria and homocystinuria cblC type                            | 2.77E-02 | MMACHC                                             | 1 |
| Developmental Disorder | Smith-Lemli-Opitz syndrome                                                     | Smith-Lemli-Opitz syndrome                                                     | 2.77E-02 | DHCR7                                              | 1 |
| Developmental Disorder | Smith-McCort dysplasia                                                         | Smith-McCort dysplasia                                                         | 2.77E-02 | DYM                                                | 1 |
| Developmental Disorder | X-linked hydrocephalus with congenital idiopathic intestinal pseudoobstruction | X-linked hydrocephalus with congenital idiopathic intestinal pseudoobstruction | 2.77E-02 | L1CAM                                              | 1 |
| Developmental Disorder | albinism-deafness syndrome of tietz                                            | albinism-deafness syndrome of tietz                                            | 2.77E-02 | MITF                                               | 1 |
| Developmental Disorder | arrhythmogenic right ventricular dysplasia familial 10                         | arrhythmogenic right ventricular dysplasia familial 10                         | 2.77E-02 | DSG2                                               | 1 |

|                        |                                                       |                                                       |          |                                                   |   |
|------------------------|-------------------------------------------------------|-------------------------------------------------------|----------|---------------------------------------------------|---|
| Developmental Disorder | bilateral frontoparietal polymicrogyria               | bilateral frontoparietal polymicrogyria               | 2.77E-02 | GPR56                                             | 1 |
| Developmental Disorder | congenital disorder of glycosylation type 1d          | congenital disorder of glycosylation type 1d          | 2.77E-02 | ALG3                                              | 1 |
| Developmental Disorder | congenital disorder of glycosylation type 1f          | congenital disorder of glycosylation type 1f          | 2.77E-02 | MPDU1                                             | 1 |
| Developmental Disorder | congenital disorder of glycosylation type 1m          | congenital disorder of glycosylation type 1m          | 2.77E-02 | DOLK                                              | 1 |
| Developmental Disorder | congenital disorders of glycosylation type 2a         | congenital disorders of glycosylation type 2a         | 2.77E-02 | MGAT2                                             | 1 |
| Developmental Disorder | congenital generalized lipodystrophy type 3           | congenital generalized lipodystrophy type 3           | 2.77E-02 | CAV1                                              | 1 |
| Developmental Disorder | creatine deficiency syndrome                          | creatine deficiency syndrome                          | 2.77E-02 | SLC6A8                                            | 1 |
| Developmental Disorder | dyggve-melchior-clausen syndrome                      | dyggve-melchior-clausen syndrome                      | 2.77E-02 | DYM                                               | 1 |
| Developmental Disorder | epidermolysis bullosa simplex with muscular dystrophy | epidermolysis bullosa simplex with muscular dystrophy | 2.77E-02 | PLEC                                              | 1 |
| Developmental Disorder | epidermolysis bullosa simplex, ogna type              | epidermolysis bullosa simplex, ogna type              | 2.77E-02 | PLEC                                              | 1 |
| Developmental Disorder | mucopolysaccharidosi s type VI                        | mucopolysaccharidosis type VI                         | 2.77E-02 | ARSB                                              | 1 |
| Developmental Disorder | osteogenesis imperfecta type IIB                      | osteogenesis imperfecta type IIB                      | 2.77E-02 | CRTAP                                             | 1 |
| Developmental Disorder | progeroid form Ehlers-Danlos syndrome                 | progeroid form Ehlers-Danlos syndrome                 | 2.77E-02 | B4GALT7                                           | 1 |
| Developmental Disorder | pseudo-hurler polydystrophy                           | pseudo-hurler polydystrophy                           | 2.77E-02 | GNPTAB                                            | 1 |
| Developmental Disorder | pyknodysostosis                                       | pyknodysostosis                                       | 2.77E-02 | CTSK                                              | 1 |
| Developmental Disorder | udpoglucose-4-epimerase deficiency                    | udpoglucose-4-epimerase deficiency                    | 2.77E-02 | GALE                                              | 1 |
| Developmental Disorder | dysplasia                                             | dysplasia                                             | 2.78E-02 | B4GALT7, CANT1, COL1A2, DYM, GNA12, NOTCH2, PLOD1 | 7 |
| Developmental Disorder | lysosomal storage disease                             | lysosomal storage disease                             | 3.01E-02 | ARSB, CAV1, FLOT2, GNPTAB, NEU1                   | 5 |
| Developmental Disorder | skeletal dysplasia                                    | skeletal dysplasia                                    | 3.87E-02 | B4GALT7, CANT1, COL1A2, DYM, NOTCH2,              | 6 |

|                                 |                                            |                                            |          |                                                                                                                                                                                                                                                                                  |    |
|---------------------------------|--------------------------------------------|--------------------------------------------|----------|----------------------------------------------------------------------------------------------------------------------------------------------------------------------------------------------------------------------------------------------------------------------------------|----|
| Disorder                        |                                            |                                            |          | PLOD1                                                                                                                                                                                                                                                                            |    |
| Skeletal and Muscular Disorders | Huntington's disease                       | Huntington's Disease                       | 1.31E-03 | CAMKK2, CASP2, CDK5R1, DHCR7, DPYSL3, EMX2, ETV4, FGF13, GIT1, HSPA5, ITPKB, MICALL1, MT1X, MT2A, NOTCH2, NRGN, PFN2, PPARGC1A, PPRC1, RGS4, SCARB2, SDC4, SETDB1, SH3BP4, SORT1, SRM, STOM, TGM2, TRAK2, UBE2D4                                                                 | 30 |
| Skeletal and Muscular Disorders | neuromuscular disease                      | neuromuscular disease                      | 2.14E-03 | CAMKK2, CASP2, CDK5R1, DBNL, DHCR7, DPYSL3, EMX2, ENO2, ETV4, FGF13, GIT1, HSPA5, ITPKB, MICALL1, MT1X, MT2A, MX1, NOTCH2, NRGN, PAK1, PFN2, PPARGC1A, PPRC1, RELA, RGS4, RNF114, RNF5, RPL15, SCARB2, SDC4, SETDB1, SH3BP4, SNCA, SORT1, SRM, STOM, TGM2, TMED10, TRAK2, UBE2D4 | 40 |
| Skeletal and Muscular Disorders | osteogenesis imperfecta type II            | osteogenesis imperfecta type II            | 2.25E-03 | COL1A2, CRTAP                                                                                                                                                                                                                                                                    | 2  |
| Skeletal and Muscular Disorders | Ehlers-Danlos syndrome                     | Ehlers-Danlos syndrome                     | 4.90E-03 | B4GALT7, COL1A2, PLOD1                                                                                                                                                                                                                                                           | 3  |
| Skeletal and Muscular Disorders | metabolic bone disease                     | metabolic bone disease                     | 2.41E-02 | B4GALT7, COL1A2, CRTAP, PLOD1                                                                                                                                                                                                                                                    | 4  |
| Skeletal and Muscular Disorders | Charcot-Marie-Tooth disease axonal type 1c | Charcot-Marie-Tooth disease axonal type 1c | 2.77E-02 | LITAF                                                                                                                                                                                                                                                                            | 1  |
| Skeletal and Muscular Disorders | Hajdu-Cheney syndrome                      | Hajdu-Cheney syndrome                      | 2.77E-02 | NOTCH2                                                                                                                                                                                                                                                                           | 1  |
| Skeletal and Muscular Disorders | Parkinson disease 1                        | Parkinson disease 1                        | 2.77E-02 | SNCA                                                                                                                                                                                                                                                                             | 1  |
| Skeletal and Muscular Disorders | Smith-McCort dysplasia                     | Smith-McCort dysplasia                     | 2.77E-02 | DYM                                                                                                                                                                                                                                                                              | 1  |
| Skeletal and Muscular Disorders | autosomal dominant Parkinson disease 4     | autosomal dominant Parkinson disease 4     | 2.77E-02 | SNCA                                                                                                                                                                                                                                                                             | 1  |

|                                        |                                                                                                     |                                                                                                     |          |                                            |   |
|----------------------------------------|-----------------------------------------------------------------------------------------------------|-----------------------------------------------------------------------------------------------------|----------|--------------------------------------------|---|
| Skeletal and Muscular Disorders        | cerebral dysgenesis, neuropathy, ichthyosis, and palmoplantar keratoderma syndrome, cednik syndrome | cerebral dysgenesis, neuropathy, ichthyosis, and palmoplantar keratoderma syndrome, cednik syndrome | 2.77E-02 | SNAP29                                     | 1 |
| Skeletal and Muscular Disorders        | dyggve-melchior-clausen syndrome                                                                    | dyggve-melchior-clausen syndrome                                                                    | 2.77E-02 | DYM                                        | 1 |
| Skeletal and Muscular Disorders        | epidermolysis bullosa simplex with muscular dystrophy                                               | epidermolysis bullosa simplex with muscular dystrophy                                               | 2.77E-02 | PLEC                                       | 1 |
| Skeletal and Muscular Disorders        | osteogenesis imperfecta type IIB                                                                    | osteogenesis imperfecta type IIB                                                                    | 2.77E-02 | CRTAP                                      | 1 |
| Skeletal and Muscular Disorders        | progeroid form Ehlers-Danlos syndrome                                                               | progeroid form Ehlers-Danlos syndrome                                                               | 2.77E-02 | B4GALT7                                    | 1 |
| Skeletal and Muscular Disorders        | pyknodysostosis                                                                                     | pyknodysostosis                                                                                     | 2.77E-02 | CTSK                                       | 1 |
| Skeletal and Muscular Disorders        | skeletal dysplasia                                                                                  | skeletal dysplasia                                                                                  | 3.87E-02 | B4GALT7, CANT1, COL1A2, DYM, NOTCH2, PLOD1 | 6 |
| Cell-To-Cell Signaling and Interaction | adhesion                                                                                            | adhesion of hOB cells                                                                               | 2.25E-03 | SDC4, TGM2                                 | 2 |
| Cell-To-Cell Signaling and Interaction | quantity                                                                                            | quantity of focal adhesions                                                                         | 2.20E-02 | CAV1, GIT1, PTK2                           | 3 |
| Cell-To-Cell Signaling and Interaction | quantity                                                                                            | quantity of monoamines                                                                              | 4.20E-02 | RAF1, SNCA                                 | 2 |
| Cell-To-Cell Signaling and Interaction | accumulation                                                                                        | accumulation of 2-arachidonoylglycerol                                                              | 2.77E-02 | MGLL                                       | 1 |
| Cell-To-Cell Signaling and Interaction | adherence                                                                                           | adherence of carcinoma cell lines                                                                   | 2.77E-02 | TIMP3                                      | 1 |

|                                        |                       |                                                           |          |        |   |
|----------------------------------------|-----------------------|-----------------------------------------------------------|----------|--------|---|
| Interaction                            |                       |                                                           |          |        |   |
| Cell-To-Cell Signaling and Interaction | adherence             | adherence of thyroid tumor cell lines                     | 2.77E-02 | TIMP3  | 1 |
| Cell-To-Cell Signaling and Interaction | attraction            | attraction of axons                                       | 2.77E-02 | L1CAM  | 1 |
| Cell-To-Cell Signaling and Interaction | cell-cell contact     | cell-cell contact of colon cancer cell lines              | 2.77E-02 | TCF12  | 1 |
| Cell-To-Cell Signaling and Interaction | contact repulsion     | contact repulsion of axons                                | 2.77E-02 | L1CAM  | 1 |
| Cell-To-Cell Signaling and Interaction | detachment            | detachment of melanoma cell lines                         | 2.77E-02 | PTK2   | 1 |
| Cell-To-Cell Signaling and Interaction | excitation            | excitation of hippocampal neurons                         | 2.77E-02 | SNCA   | 1 |
| Cell-To-Cell Signaling and Interaction | inflammatory response | inflammatory response of monocyte-derived dendritic cells | 2.77E-02 | RELA   | 1 |
| Cell-To-Cell Signaling and Interaction | localization          | localization of focal adhesions                           | 2.77E-02 | PTK2   | 1 |
| Cell-To-Cell Signaling and Interaction | morphology            | morphology of synapse                                     | 2.77E-02 | SNCA   | 1 |
| Cell-To-Cell Signaling and Interaction | recognition           | recognition of fibroblast cell lines                      | 2.77E-02 | RELA   | 1 |
| Cell-To-Cell Signaling and Interaction | recognition           | recognition of lung cell lines                            | 2.77E-02 | RELA   | 1 |
| Cell-To-Cell Signaling and Interaction | recovery              | recovery of synapse                                       | 2.77E-02 | SNAP29 | 1 |
| Cell-To-Cell                           | stimulation           | stimulation of chronic lymphocytic                        | 2.77E-02 | TXLNA  | 1 |

|                                            |                                 |                                        |          |                               |   |
|--------------------------------------------|---------------------------------|----------------------------------------|----------|-------------------------------|---|
| Signaling and Interaction                  |                                 | leukemia cells                         |          |                               |   |
| Cell-To-Cell Signaling and Interaction     | binding                         | binding of kidney cell lines           | 2.83E-02 | CAV1, SDC4, SORT1, ST6GAL1    | 4 |
| Cell-To-Cell Signaling and Interaction     | binding                         | binding of embryonic cell lines        | 3.09E-02 | CAV1, SDC4, SORT1             | 3 |
| Cell-To-Cell Signaling and Interaction     | binding                         | binding of epithelial cell lines       | 3.77E-02 | CAV1, SDC4, SORT1             | 3 |
| Connective Tissue Development and Function | adhesion                        | adhesion of hOB cells                  | 2.25E-03 | SDC4, TGM2                    | 2 |
| Connective Tissue Development and Function | proliferation                   | proliferation of fibroblast cell lines | 1.65E-02 | CBL, FOXO3, PTK2, RAF1, TGM2  | 5 |
| Connective Tissue Development and Function | S phase                         | initiation of S phase of fibroblasts   | 2.77E-02 | SKP2                          | 1 |
| Connective Tissue Disorders                | osteogenesis imperfecta type II | osteogenesis imperfecta type II        | 2.25E-03 | COL1A2, CRTAP                 | 2 |
| Connective Tissue Disorders                | Ehlers-Danlos syndrome          | Ehlers-Danlos syndrome                 | 4.90E-03 | B4GALT7, COL1A2, PLOD1        | 3 |
| Connective Tissue Disorders                | metabolic bone disease          | metabolic bone disease                 | 2.41E-02 | B4GALT7, COL1A2, CRTAP, PLOD1 | 4 |
| Connective Tissue Disorders                | Hajdu-Cheney syndrome           | Hajdu-Cheney syndrome                  | 2.77E-02 | NOTCH2                        | 1 |
| Connective Tissue Disorders                | Smith-McCort dysplasia          | Smith-McCort dysplasia                 | 2.77E-02 | DYM                           | 1 |

|                                                       |                                                       |                                                       |          |                                            |   |
|-------------------------------------------------------|-------------------------------------------------------|-------------------------------------------------------|----------|--------------------------------------------|---|
| Connective Tissue Disorders                           | alkalinization                                        | alkalinization of fibroblasts                         | 2.77E-02 | SLC9A1                                     | 1 |
| Connective Tissue Disorders                           | arterial tortuosity syndrome                          | arterial tortuosity syndrome                          | 2.77E-02 | SLC2A10                                    | 1 |
| Connective Tissue Disorders                           | dyggve-melchior-clausen syndrome                      | dyggve-melchior-clausen syndrome                      | 2.77E-02 | DYM                                        | 1 |
| Connective Tissue Disorders                           | epidermolysis bullosa simplex with muscular dystrophy | epidermolysis bullosa simplex with muscular dystrophy | 2.77E-02 | PLEC                                       | 1 |
| Connective Tissue Disorders                           | epidermolysis bullosa simplex, ogna type              | epidermolysis bullosa simplex, ogna type              | 2.77E-02 | PLEC                                       | 1 |
| Connective Tissue Disorders                           | osteogenesis imperfecta type IIB                      | osteogenesis imperfecta type IIB                      | 2.77E-02 | CRTAP                                      | 1 |
| Connective Tissue Disorders                           | progeroid form Ehlers-Danlos syndrome                 | progeroid form Ehlers-Danlos syndrome                 | 2.77E-02 | B4GALT7                                    | 1 |
| Connective Tissue Disorders                           | pyknodysostosis                                       | pyknodysostosis                                       | 2.77E-02 | CTSK                                       | 1 |
| Connective Tissue Disorders                           | skeletal dysplasia                                    | skeletal dysplasia                                    | 3.87E-02 | B4GALT7, CANT1, COL1A2, DYM, NOTCH2, PLOD1 | 6 |
| Skeletal and Muscular System Development and Function | adhesion                                              | adhesion of hOB cells                                 | 2.25E-03 | SDC4, TGM2                                 | 2 |
| Skeletal and Muscular System Development and Function | cell movement                                         | cell movement of vascular smooth muscle cells         | 1.54E-02 | CLIC4, GIT1, SDC4, TRIB1                   | 4 |
| Skeletal and                                          | cell spreading                                        | cell spreading of vascular smooth muscle              | 2.77E-02 | GIT1                                       | 1 |

|                                                       |                   |                                              |          |                                                                   |    |
|-------------------------------------------------------|-------------------|----------------------------------------------|----------|-------------------------------------------------------------------|----|
| Muscular System Development and Function              |                   | cells                                        |          |                                                                   |    |
| Skeletal and Muscular System Development and Function | migration         | migration of vascular smooth muscle cells    | 4.93E-02 | CLIC4, GIT1, SDC4                                                 | 3  |
| Tissue Development                                    | adhesion          | adhesion of hOB cells                        | 2.25E-03 | SDC4, TGM2                                                        | 2  |
| Tissue Development                                    | formation         | formation of fibrils                         | 1.07E-02 | IDE, SERPINH1, SNCA                                               | 3  |
| Tissue Development                                    | formation         | formation of collagen fibrils                | 2.77E-02 | SERPINH1                                                          | 1  |
| Tissue Development                                    | formation         | formation of nerve fascicle                  | 2.77E-02 | L1CAM                                                             | 1  |
| Tissue Development                                    | formation         | formation of protofibrils                    | 2.77E-02 | SNCA                                                              | 1  |
| Tissue Development                                    | formation         | formation of microtubules                    | 3.09E-02 | DPYSL2, PSRC1, TBCD                                               | 3  |
| Tissue Development                                    | formation         | formation of filaments                       | 3.78E-02 | CAV1, DPYSL2, IDE, PAK1, PSRC1, PTK2, SERPINH1, SIRPA, SNCA, TBCD | 10 |
| Tissue Development                                    | tubulation        | tubulation of epithelial tissue              | 1.91E-02 | CAV1, FOXO3, RAF1, RGS4, TIMP3                                    | 5  |
| Tissue Development                                    | tubulation        | delay in tubulation of epithelial cells      | 2.77E-02 | RGS4                                                              | 1  |
| Tissue Development                                    | tubulation        | tubulation of HAEC cells                     | 2.77E-02 | RAF1                                                              | 1  |
| Tissue Development                                    | quantity          | quantity of focal adhesions                  | 2.20E-02 | CAV1, GIT1, PTK2                                                  | 3  |
| Tissue Development                                    | adherence         | adherence of carcinoma cell lines            | 2.77E-02 | TIMP3                                                             | 1  |
| Tissue Development                                    | adherence         | adherence of thyroid tumor cell lines        | 2.77E-02 | TIMP3                                                             | 1  |
| Tissue Development                                    | cell-cell contact | cell-cell contact of colon cancer cell lines | 2.77E-02 | TCF12                                                             | 1  |
| Tissue                                                | detachment        | detachment of melanoma cell lines            | 2.77E-02 | PTK2                                                              | 1  |



|                    |                                   |                                       |          |                                                                                                                                                                                                                                                                                                                                                                                         |    |
|--------------------|-----------------------------------|---------------------------------------|----------|-----------------------------------------------------------------------------------------------------------------------------------------------------------------------------------------------------------------------------------------------------------------------------------------------------------------------------------------------------------------------------------------|----|
| Development        |                                   |                                       |          |                                                                                                                                                                                                                                                                                                                                                                                         |    |
| Tissue Development | development                       | development of pyramidal tract        | 2.77E-02 | L1CAM                                                                                                                                                                                                                                                                                                                                                                                   | 1  |
| Tissue Development | localization                      | localization of focal adhesions       | 2.77E-02 | PTK2                                                                                                                                                                                                                                                                                                                                                                                    | 1  |
| Tissue Development | polymerization                    | polymerization of actin stress fibers | 2.77E-02 | PAK1                                                                                                                                                                                                                                                                                                                                                                                    | 1  |
| Cell Signaling     | protein kinase cascade            | protein kinase cascade                | 2.26E-03 | ATP2C1, CAMKK2, CANT1, CXXC5, FGF13, ICK, LITAF, MKNK2, NDFIP2, NMI, OXSR1, RYK, SHISA5, SLC35B2, TGFA, TRIB1, UBE2N                                                                                                                                                                                                                                                                    | 17 |
| Cell Signaling     | entrance                          | entrance of Ca <sup>2+</sup>          | 3.96E-03 | CAV1, MX1, ORAI1, PSEN2                                                                                                                                                                                                                                                                                                                                                                 | 4  |
| Cell Signaling     | I-kappaB kinase/NF-kappaB cascade | I-kappaB kinase/NF-kappaB cascade     | 8.23E-03 | ATP2C1, CANT1, CXXC5, LITAF, NDFIP2, SHISA5, SLC35B2, UBE2N                                                                                                                                                                                                                                                                                                                             | 8  |
| Cell Signaling     | diffusion                         | diffusion of Ca <sup>2+</sup>         | 2.77E-02 | VDAC1                                                                                                                                                                                                                                                                                                                                                                                   | 1  |
| Cell Signaling     | leakage                           | leakage of Ca <sup>2+</sup>           | 2.77E-02 | TMBIM6                                                                                                                                                                                                                                                                                                                                                                                  | 1  |
| Infectious Disease | replication                       | replication of virus                  | 2.72E-03 | AGFG1, AP1M1, ATG7, ATP2C1, CANT1, CASP2, CLIC4, ILF3, LINGO1, MX1, MX2, NUDCD3, OXSR1, PAK2, PLK4, PPARGC1A, RAF1, RELA, RFFL, SIGMAR1, STX5, TRIM25, TRPV2, UBE2E2, UBE3C, UBQLN4                                                                                                                                                                                                     | 26 |
| Infectious Disease | replication                       | replication of RNA virus              | 9.09E-03 | AGFG1, AP1M1, ATG7, ATP2C1, CANT1, CASP2, CLIC4, ILF3, LINGO1, MX1, NUDCD3, OXSR1, PAK2, PLK4, RAF1, RELA, RFFL, SIGMAR1, STX5, TRIM25, TRPV2, UBE2E2, UBQLN4                                                                                                                                                                                                                           | 23 |
| Infectious Disease | replication                       | replication of Influenza A virus      | 1.21E-02 | ATP2C1, CANT1, CLIC4, ILF3, LINGO1, MX1, NUDCD3, OXSR1, PAK2, PLK4, RELA, RFFL, SIGMAR1, STX5, TRPV2, UBQLN4                                                                                                                                                                                                                                                                            | 16 |
| Infectious Disease | replication                       | replication of Thogoto virus          | 2.77E-02 | MX1                                                                                                                                                                                                                                                                                                                                                                                     | 1  |
| Infectious Disease | infection                         | Viral Infection                       | 3.79E-03 | AGFG1, AP1M1, AP3M1, ATG7, ATP2C1, BCL9, C20orf24, CAMKK2, CANT1, CASP2, CAV1, CBL, CBLB, CLIC4, COG2, CRTC3, DAZAP2, DHX33, DSG2, FLOT2, HCP5, HSPA5, ILF3, IRS2, LINGO1, MGLL, MICALL1, MRPL10, MT1X, MT2A, MX1, MX2, NUDCD3, OSBPL3, OXSR1, PAK1, PAK2, PDE7B, PDXK, PIGH, PIK3CB, PKMYT1, PLK4, PPARGC1A, PSEN2, RAF1, RELA, REPIN1, RFFL, RNF144A, SH2B3, SIGMAR1, SSU72, ST3GAL5, | 69 |

|                         |                                   |                                        |          |                                                                                                                                                                                                                                                                                                                                                                                        |    |
|-------------------------|-----------------------------------|----------------------------------------|----------|----------------------------------------------------------------------------------------------------------------------------------------------------------------------------------------------------------------------------------------------------------------------------------------------------------------------------------------------------------------------------------------|----|
|                         |                                   |                                        |          | ST6GAL1, STX5, TMC6, TRIM25, TRIM8, TROVE2, TRPV2, TYRO3, UBE2E2, UBE2Z, UBE3C, UBQLN4, USP39, VPS4A, WASF2                                                                                                                                                                                                                                                                            |    |
| Infectious Disease      | infection                         | infection by Zaire ebolavirus          | 9.02E-03 | HSPA5, PAK1, TYRO3                                                                                                                                                                                                                                                                                                                                                                     | 3  |
| Infectious Disease      | infection                         | infection of respiratory tract         | 1.59E-02 | C20orf24, FLOT2, IRS2, PDXK, PIK3CB, SH2B3, SIGMAR1, ST6GAL1, TROVE2                                                                                                                                                                                                                                                                                                                   | 9  |
| Infectious Disease      | infection                         | infection of leukemia cell lines       | 4.88E-02 | PAK1, TYRO3                                                                                                                                                                                                                                                                                                                                                                            | 2  |
| Infectious Disease      | Ebola hemorrhagic fever           | Ebola hemorrhagic fever                | 3.96E-03 | HSPA5, MGLL, PAK1, TYRO3                                                                                                                                                                                                                                                                                                                                                               | 4  |
| Infectious Disease      | localization                      | localization of virus                  | 4.42E-03 | CBL, VPS4A                                                                                                                                                                                                                                                                                                                                                                             | 2  |
| Infectious Disease      | severe acute respiratory syndrome | severe acute respiratory syndrome      | 1.84E-02 | C20orf24, FLOT2, IRS2, PDXK, PIK3CB, SH2B3, ST6GAL1, TROVE2                                                                                                                                                                                                                                                                                                                            | 8  |
| Infectious Disease      | quantity                          | quantity of flavivirus                 | 2.77E-02 | HSPA5                                                                                                                                                                                                                                                                                                                                                                                  | 1  |
| Infectious Disease      | uptake                            | uptake of Human adenovirus 35          | 2.77E-02 | PAK1                                                                                                                                                                                                                                                                                                                                                                                   | 1  |
| Infectious Disease      | budding                           | budding of lentivirus                  | 2.97E-02 | AP1M1, VPS4A                                                                                                                                                                                                                                                                                                                                                                           | 2  |
| Cell Death and Survival | cell death                        | cell death of cortical neurons         | 3.38E-03 | RELA, SNCA, SP1, TGFA                                                                                                                                                                                                                                                                                                                                                                  | 4  |
| Cell Death and Survival | cell death                        | cell death of epithelial cells         | 6.80E-03 | ATG7, CASP2, CDC37, HSPA5, MITF, NRG1, PAK2, PRMT2, PTK2, RGS4, SDHC, SNCA, TCF12, TIMP3, VDAC1, VOPP1                                                                                                                                                                                                                                                                                 | 16 |
| Cell Death and Survival | cell death                        | cell death of skin cancer cell lines   | 1.07E-02 | ATG7, CHEK1, RELA                                                                                                                                                                                                                                                                                                                                                                      | 3  |
| Cell Death and Survival | cell death                        | cell death of tumor cell lines         | 1.43E-02 | ARMC10, ATG7, BIRC7, CADM1, CASP2, CAV1, CDK2, CDK5R1, CHEK1, DCT, DCTD, DHCR24, DNAJC15, DSG2, EGR3, ELK1, FOXO3, GLO1, GRINA, HSPA5, MCRC1, MIF4GD, MITF, MT1X, MT2A, NOTCH2, NUDCD3, ORAI1, PAK1, PAK2, PIK3CB, PKMYT1, PPARGC1A, PPP1R11, PRR7, PSEN2, PTK2, RABL6, RAF1, RELA, RNF5, SDHC, SIRPA, SKP2, SNCA, SP1, ST6GAL1, TGFA, TGM2, TIMP3, TMBIM6, TMED10, VDAC1, VOPP1, XPR1 | 55 |
| Cell Death and Survival | cell death                        | cell death of breast cancer cell lines | 1.59E-02 | ATG7, CASP2, CAV1, CHEK1, DNAJC15, ELK1,                                                                                                                                                                                                                                                                                                                                               | 16 |

|                         |              |                                              |          |                                                                                                                                                                                                                                                                                                                         |    |
|-------------------------|--------------|----------------------------------------------|----------|-------------------------------------------------------------------------------------------------------------------------------------------------------------------------------------------------------------------------------------------------------------------------------------------------------------------------|----|
| Survival                |              |                                              |          | FOXO3, HSPA5, PIK3CB, PTK2, RABL6, RAF1, RELA, RNF5, SDHC, SP1                                                                                                                                                                                                                                                          |    |
| Cell Death and Survival | cell death   | cell death of prostate cancer cell lines     | 1.94E-02 | CAV1, CDK5R1, CHEK1, FOXO3, ORAI1, PAK1, RAF1, RELA, TGFA, TMBIM6, TMED10                                                                                                                                                                                                                                               | 11 |
| Cell Death and Survival | cell death   | cell death of cervical cancer cell lines     | 2.46E-02 | ATG7, BIRC7, CASP2, CHEK1, GRINA, MCERS1, MIF4GD, NUDCD3, PAK1, PAK2, PSEN2, RAF1, SNCA, TIMP3, VDAC1, VOPP1                                                                                                                                                                                                            | 16 |
| Cell Death and Survival | cell death   | cell death of embryonic cell lines           | 3.17E-02 | ATG7, CASP2, HSPA5, NRG, PAK2, PRMT2, RGS4, SDHC, SNCA, TCF12, VDAC1, VOPP1                                                                                                                                                                                                                                             | 12 |
| Cell Death and Survival | cell death   | cell death of epithelial cell lines          | 4.04E-02 | ATG7, CASP2, HSPA5, NRG, PAK2, PRMT2, RGS4, SDHC, SNCA, TCF12, VDAC1, VOPP1                                                                                                                                                                                                                                             | 12 |
| Cell Death and Survival | cell death   | cell death of lymphoblastoid cell lines      | 4.82E-02 | CADM1, CASP2, CAV1, CDK2, CHEK1, DCTD                                                                                                                                                                                                                                                                                   | 6  |
| Cell Death and Survival | condensation | condensation of chromatin                    | 3.96E-03 | CDK2, CHEK1, RAF1, SETD8                                                                                                                                                                                                                                                                                                | 4  |
| Cell Death and Survival | apoptosis    | apoptosis of melanoma cell lines             | 5.45E-03 | BIRC7, CHEK1, DCT, FOXO3, HSPA5, MITF, PKMYT1, RNF5                                                                                                                                                                                                                                                                     | 8  |
| Cell Death and Survival | apoptosis    | apoptosis of embryonic cell lines            | 7.45E-03 | CASP2, HSPA5, NRG, PAK2, PRMT2, RGS4, SDHC, SNCA, TCF12, VDAC1, VOPP1                                                                                                                                                                                                                                                   | 11 |
| Cell Death and Survival | apoptosis    | apoptosis of epithelial cell lines           | 1.12E-02 | CASP2, HSPA5, NRG, PAK2, PRMT2, RGS4, SDHC, SNCA, TCF12, VDAC1, VOPP1                                                                                                                                                                                                                                                   | 11 |
| Cell Death and Survival | apoptosis    | apoptosis of tumor cell lines                | 1.70E-02 | ARMC10, ATG7, BIRC7, CASP2, CAV1, CDK2, CDK5R1, CHEK1, DCT, DNAJC15, DSG2, EGR3, FOXO3, GLO1, HSPA5, MCERS1, MITF, MT2A, ORAI1, PAK1, PAK2, PIK3CB, PKMYT1, PPARGC1A, PPP1R11, PRR7, PSEN2, PTK2, RABL6, RAF1, RELA, RNF5, SDHC, SIRPA, SKP2, SNCA, SP1, ST6GAL1, TGFA, TGM2, TIMP3, TMBIM6, TMED10, VDAC1, VOPP1, XPR1 | 46 |
| Cell Death and Survival | apoptosis    | apoptosis of prostate cancer cell lines      | 1.93E-02 | CAV1, CDK5R1, FOXO3, ORAI1, PAK1, RAF1, RELA, TGFA, TMBIM6, TMED10                                                                                                                                                                                                                                                      | 10 |
| Cell Death and Survival | apoptosis    | apoptosis of kidney cell lines               | 2.36E-02 | CASP2, HSPA5, NRG, PAK2, PRMT2, RGS4, SDHC, SNCA, TCF12, VDAC1, VOPP1                                                                                                                                                                                                                                                   | 11 |
| Cell Death and Survival | apoptosis    | apoptosis of leukemia cell lines             | 2.57E-02 | CASP2, CAV1, EGR3, FOXO3, GLO1, ORAI1, PAK1, PAK2, PPP1R11, PRR7, PTK2, RAF1, RELA, TGFA                                                                                                                                                                                                                                | 14 |
| Cell Death and Survival | apoptosis    | apoptosis of microvascular endothelial cells | 2.77E-02 | FOXO3, HSPA5, VDAC1                                                                                                                                                                                                                                                                                                     | 3  |

|                                            |                            |                                                          |          |                                                                                     |    |
|--------------------------------------------|----------------------------|----------------------------------------------------------|----------|-------------------------------------------------------------------------------------|----|
| Cell Death and Survival                    | apoptosis                  | apoptosis of breast cancer cell lines                    | 4.30E-02 | ATG7, CASP2, CAV1, CHEK1, FOXO3, HSPA5, PIK3CB, PTK2, RABL6, RAF1, RELA, RNF5, SDHC | 13 |
| Cell Death and Survival                    | atrophy                    | atrophy of myofiber                                      | 2.77E-02 | FOXO3                                                                               | 1  |
| Cell Death and Survival                    | degeneration               | degeneration of striatonigral neurons                    | 2.77E-02 | SNCA                                                                                | 1  |
| Cell Death and Survival                    | maturation                 | maturation of apoptotic bodies                           | 2.77E-02 | CASP2                                                                               | 1  |
| Cell Death and Survival                    | cell viability             | cell viability of stomach cancer cell lines              | 4.88E-02 | CAV1, PTK2                                                                          | 2  |
| DNA Replication, Recombination, and Repair | condensation               | condensation of chromatin                                | 3.96E-03 | CDK2, CHEK1, RAF1, SETD8                                                            | 4  |
| DNA Replication, Recombination, and Repair | S phase checkpoint control | S phase checkpoint control of tumor cell lines           | 2.42E-02 | CHEK1, CKS2                                                                         | 2  |
| DNA Replication, Recombination, and Repair | S phase checkpoint control | S phase checkpoint control of breast cancer cell lines   | 2.77E-02 | CKS2                                                                                | 1  |
| DNA Replication, Recombination, and Repair | S phase checkpoint control | S phase checkpoint control of lymphoblastoid cell lines  | 2.77E-02 | CHEK1                                                                               | 1  |
| DNA Replication, Recombination, and Repair | DNA replication checkpoint | DNA replication checkpoint of cervical cancer cell lines | 2.77E-02 | CHEK1                                                                               | 1  |
| DNA Replication, Recombination, and Repair | DNA replication checkpoint | DNA replication checkpoint of colon cancer cell lines    | 2.77E-02 | CHEK1                                                                               | 1  |
| DNA Replication, Recombination, and Repair | deamination                | deamination of adenosine                                 | 2.77E-02 | ADAT1                                                                               | 1  |

|                                            |                                        |                                        |          |                          |   |
|--------------------------------------------|----------------------------------------|----------------------------------------|----------|--------------------------|---|
| DNA Replication, Recombination, and Repair | homologous recombination               | homologous recombination of gene       | 2.77E-02 | CDK2                     | 1 |
| DNA Replication, Recombination, and Repair | quantity                               | quantity of mitotic spindle            | 4.20E-02 | NUDCD3, PAK1             | 2 |
| Hematological Disease                      | Ebola hemorrhagic fever                | Ebola hemorrhagic fever                | 3.96E-03 | HSPA5, MGLL, PAK1, TYRO3 | 4 |
| Hematological Disease                      | infection                              | infection by Zaire ebolavirus          | 9.02E-03 | HSPA5, PAK1, TYRO3       | 3 |
| Hematological Disease                      | infection                              | infection of leukemia cell lines       | 4.88E-02 | PAK1, TYRO3              | 2 |
| Hematological Disease                      | agammaglobulinemia type 5              | agammaglobulinemia type 5              | 2.77E-02 | LRRC8A                   | 1 |
| Hematological Disease                      | centroblastic lymphoma                 | centroblastic lymphoma                 | 2.77E-02 | CASP2                    | 1 |
| Hematological Disease                      | overhydrated hereditary stomatocytosis | overhydrated hereditary stomatocytosis | 2.77E-02 | STOM                     | 1 |
| Molecular Transport                        | entrance                               | entrance of Ca <sup>2+</sup>           | 3.96E-03 | CAV1, MX1, ORAI1, PSEN2  | 4 |
| Molecular Transport                        | accumulation                           | accumulation of 2-arachidonoylglycerol | 2.77E-02 | MGLL                     | 1 |
| Molecular Transport                        | clearance                              | clearance of synthetic promoter        | 2.77E-02 | SP1                      | 1 |
| Molecular Transport                        | secretion                              | secretion of lysophosphatidic acid     | 2.77E-02 | AGK                      | 1 |
| Molecular Transport                        | transport                              | transport of dADP                      | 2.77E-02 | SLC25A19                 | 1 |
| Molecular Transport                        | transport                              | transport of dATP                      | 2.77E-02 | SLC25A19                 | 1 |
| Molecular Transport                        | transport                              | transport of dCDP                      | 2.77E-02 | SLC25A19                 | 1 |
| Molecular Transport                        | transport                              | transport of dGDP                      | 2.77E-02 | SLC25A19                 | 1 |
| Molecular Transport                        | transport                              | transport of dGTP                      | 2.77E-02 | SLC25A19                 | 1 |

|                                    |              |                                              |          |                         |   |
|------------------------------------|--------------|----------------------------------------------|----------|-------------------------|---|
| Transport                          |              |                                              |          |                         |   |
| Molecular Transport                | transport    | transport of dTDP                            | 2.77E-02 | SLC25A19                | 1 |
| Molecular Transport                | transport    | transport of dTTP                            | 2.77E-02 | SLC25A19                | 1 |
| Molecular Transport                | transport    | transport of deoxycytidine triphosphate      | 2.77E-02 | SLC25A19                | 1 |
| Molecular Transport                | transport    | transport of phosphoadenosine phosphosulfate | 2.77E-02 | SLC35B2                 | 1 |
| Molecular Transport                | uptake       | uptake of creatine                           | 2.77E-02 | SLC6A8                  | 1 |
| Molecular Transport                | import       | import of D-glucose                          | 2.77E-02 | IRS2, RHOQ, SORT1       | 3 |
| Molecular Transport                | quantity     | quantity of monoamines                       | 4.20E-02 | RAF1, SNCA              | 2 |
| Vitamin and Mineral Metabolism     | entrance     | entrance of Ca <sup>2+</sup>                 | 3.96E-03 | CAV1, MX1, ORAI1, PSEN2 | 4 |
| Vitamin and Mineral Metabolism     | synthesis    | synthesis of cholesterol                     | 6.11E-03 | CAV1, DHCR24, DHCR7     | 3 |
| Vitamin and Mineral Metabolism     | biosynthesis | biosynthesis of dolichol monophosphate       | 2.77E-02 | DOLK                    | 1 |
| Vitamin and Mineral Metabolism     | biosynthesis | biosynthesis of pyridoxal phosphate          | 2.77E-02 | PDXK                    | 1 |
| Vitamin and Mineral Metabolism     | diffusion    | diffusion of Ca <sup>2+</sup>                | 2.77E-02 | VDAC1                   | 1 |
| Vitamin and Mineral Metabolism     | leakage      | leakage of Ca <sup>2+</sup>                  | 2.77E-02 | TMBIM6                  | 1 |
| Cellular Assembly and Organization | biogenesis   | biogenesis of mitochondria                   | 4.42E-03 | CRTC3, PPARGC1A         | 2 |
| Cellular Assembly and              | quantity     | quantity of granules                         | 4.42E-03 | RAF1, SNCA              | 2 |

|                                    |              |                                        |          |                                                                                 |    |
|------------------------------------|--------------|----------------------------------------|----------|---------------------------------------------------------------------------------|----|
| Organization                       |              |                                        |          |                                                                                 |    |
| Cellular Assembly and Organization | quantity     | quantity of focal adhesions            | 2.20E-02 | CAV1, GIT1, PTK2                                                                | 3  |
| Cellular Assembly and Organization | quantity     | quantity of nerve ending               | 2.77E-02 | SNCA                                                                            | 1  |
| Cellular Assembly and Organization | quantity     | quantity of perikaryon                 | 2.77E-02 | SNCA                                                                            | 1  |
| Cellular Assembly and Organization | quantity     | quantity of secretory granules         | 2.77E-02 | RAF1                                                                            | 1  |
| Cellular Assembly and Organization | quantity     | quantity of tubulovesicular structures | 2.77E-02 | CAV1                                                                            | 1  |
| Cellular Assembly and Organization | quantity     | quantity of mitotic spindle            | 4.20E-02 | NUDCD3, PAK1                                                                    | 2  |
| Cellular Assembly and Organization | organization | organization of vesicles               | 7.24E-03 | CAV1, SORT1                                                                     | 2  |
| Cellular Assembly and Organization | organization | organization of organelle              | 1.85E-02 | ARSB, B4GALT7, CAV1, COG2, COL1A2, PEX19, PSRC1, RHOQ, SERP1, SORT1, SRF, TMED9 | 12 |
| Cellular Assembly and Organization | retraction   | retraction of cellular tail            | 7.24E-03 | ADCY9, PAK1                                                                     | 2  |
| Cellular Assembly and Organization | formation    | formation of fibrils                   | 1.07E-02 | IDE, SERPINH1, SNCA                                                             | 3  |
| Cellular Assembly and Organization | formation    | formation of autolysosomes             | 2.77E-02 | VPS4A                                                                           | 1  |
| Cellular Assembly and Organization | formation    | formation of collagen fibrils          | 2.77E-02 | SERPINH1                                                                        | 1  |
| Cellular                           | formation    | formation of macropinosomes            | 2.77E-02 | WASF2                                                                           | 1  |

|                                    |             |                                        |          |                                                                            |    |
|------------------------------------|-------------|----------------------------------------|----------|----------------------------------------------------------------------------|----|
| Assembly and Organization          |             |                                        |          |                                                                            |    |
| Cellular Assembly and Organization | formation   | formation of protofibrils              | 2.77E-02 | SNCA                                                                       | 1  |
| Cellular Assembly and Organization | formation   | formation of microtubules              | 3.09E-02 | DPYSL2, PSRC1, TBCD                                                        | 3  |
| Cellular Assembly and Organization | formation   | formation of filaments                 | 3.78E-02 | CAV1, DPYSL2, IDE, PAK1, PSRC1, PTK2, SERPINH1, SIRPA, SNCA, TBCD          | 10 |
| Cellular Assembly and Organization | targeting   | targeting of vesicles                  | 1.46E-02 | SNAP29, STX5                                                               | 2  |
| Cellular Assembly and Organization | association | association of actin cytoskeleton      | 2.77E-02 | FXVD5                                                                      | 1  |
| Cellular Assembly and Organization | binding     | binding of Golgi membrane              | 2.77E-02 | TMED10                                                                     | 1  |
| Cellular Assembly and Organization | binding     | binding of nucleoprotein filaments     | 2.77E-02 | UBE2N                                                                      | 1  |
| Cellular Assembly and Organization | development | development of fibrillar inclusions    | 2.77E-02 | SNCA                                                                       | 1  |
| Cellular Assembly and Organization | development | development of cytoplasm               | 2.86E-02 | CAV1, CRT3, DPYSL2, PAK1, PEX19, PPARGC1A, PSRC1, PTK2, SIRPA, TBCD, VPS4A | 11 |
| Cellular Assembly and Organization | disruption  | disruption of cortical actin filaments | 2.77E-02 | RHOQ                                                                       | 1  |
| Cellular Assembly and Organization | disruption  | disruption of fibrils                  | 2.77E-02 | SNCA                                                                       | 1  |
| Cellular Assembly and Organization | disruption  | disruption of vesicle aggregates       | 2.77E-02 | SNCA                                                                       | 1  |



|                                    |                |                                                |          |                                              |   |
|------------------------------------|----------------|------------------------------------------------|----------|----------------------------------------------|---|
| Cellular Assembly and Organization | localization   | localization of focal adhesions                | 2.77E-02 | PTK2                                         | 1 |
| Cellular Assembly and Organization | maturation     | maturation of apoptotic bodies                 | 2.77E-02 | CASP2                                        | 1 |
| Cellular Assembly and Organization | polymerization | polymerization of actin stress fibers          | 2.77E-02 | PAK1                                         | 1 |
| Cellular Assembly and Organization | production     | production of cytoplasmic aggregates           | 2.77E-02 | SNCA                                         | 1 |
| Cellular Assembly and Organization | fusion         | fusion of endosomes                            | 4.88E-02 | C20orf24, CBL                                | 2 |
| Cell Morphology                    | tubulation     | tubulation of cells                            | 4.66E-03 | CAV1, CLIC4, FOXO3, ORAI1, RAF1, RGS4, TIMP3 | 7 |
| Cell Morphology                    | tubulation     | delay in tubulation of epithelial cells        | 2.77E-02 | RGS4                                         | 1 |
| Cell Morphology                    | tubulation     | tubulation of HAEC cells                       | 2.77E-02 | RAF1                                         | 1 |
| Cell Morphology                    | repair         | repair of colon cancer cell lines              | 7.24E-03 | CHEK1, UBE2N                                 | 2 |
| Cell Morphology                    | autophagy      | autophagy of bone cancer cell lines            | 1.46E-02 | ATG7, RELA                                   | 2 |
| Cell Morphology                    | morphology     | morphology of carcinoma cell lines             | 1.47E-02 | GNA12, RAF1, STMN3                           | 3 |
| Cell Morphology                    | morphology     | morphology of sarcoma cell lines               | 2.77E-02 | TIMP3                                        | 1 |
| Cell Morphology                    | morphology     | morphology of synapse                          | 2.77E-02 | SNCA                                         | 1 |
| Cell Morphology                    | polarization   | polarization of tumor cell lines               | 2.47E-02 | DPYSL2, GNA12, PAK1                          | 3 |
| Cell Morphology                    | polarization   | polarization of leukemia cell lines            | 4.20E-02 | DPYSL2, GNA12                                | 2 |
| Cell Morphology                    | cell spreading | cell spreading of vascular smooth muscle cells | 2.77E-02 | GIT1                                         | 1 |
| Cell                               | cell spreading | cell spreading of breast cancer cell lines     | 2.97E-02 | CBL, PAK1                                    | 2 |

|                                        |                                                                                                     |                                                                                                     |          |                        |   |
|----------------------------------------|-----------------------------------------------------------------------------------------------------|-----------------------------------------------------------------------------------------------------|----------|------------------------|---|
| Morphology                             |                                                                                                     |                                                                                                     |          |                        |   |
| Cell Morphology                        | enlargement                                                                                         | enlargement of fibroblast cell lines                                                                | 2.77E-02 | MCRS1                  | 1 |
| Cell Morphology                        | enlargement                                                                                         | enlargement of fibrosarcoma cell lines                                                              | 2.77E-02 | MCRS1                  | 1 |
| Cell Morphology                        | enlargement                                                                                         | enlargement of lung cell lines                                                                      | 2.77E-02 | MCRS1                  | 1 |
| Cell Morphology                        | mineralization                                                                                      | mineralization of bone cancer cell lines                                                            | 2.77E-02 | SNCA                   | 1 |
| Cell Morphology                        | pH                                                                                                  | pH of neurons                                                                                       | 2.77E-02 | L1CAM                  | 1 |
| Cell Morphology                        | pH                                                                                                  | pH of cells                                                                                         | 4.88E-02 | L1CAM, SLC9A1          | 2 |
| Cell Morphology                        | swelling                                                                                            | swelling of lysosome                                                                                | 2.77E-02 | VPS26A                 | 1 |
| Cell Morphology                        | budding                                                                                             | budding of lentivirus                                                                               | 2.97E-02 | AP1M1, VPS4A           | 2 |
| Dermatological Diseases and Conditions | Ehlers-Danlos syndrome                                                                              | Ehlers-Danlos syndrome                                                                              | 4.90E-03 | B4GALT7, COL1A2, PLOD1 | 3 |
| Dermatological Diseases and Conditions | skin squamous cell carcinoma                                                                        | skin squamous cell carcinoma                                                                        | 2.47E-02 | CAV1, HSPA5, TGFA      | 3 |
| Dermatological Diseases and Conditions | Hailey-Hailey disease                                                                               | Hailey-Hailey disease                                                                               | 2.77E-02 | ATP2C1                 | 1 |
| Dermatological Diseases and Conditions | cerebral dysgenesis, neuropathy, ichthyosis, and palmoplantar keratoderma syndrome, cednik syndrome | cerebral dysgenesis, neuropathy, ichthyosis, and palmoplantar keratoderma syndrome, cednik syndrome | 2.77E-02 | SNAP29                 | 1 |
| Dermatological Diseases and Conditions | epidermolysis bullosa simplex with muscular dystrophy                                               | epidermolysis bullosa simplex with muscular dystrophy                                               | 2.77E-02 | PLEC                   | 1 |
| Dermatological Diseases and Conditions | epidermolysis bullosa simplex, oyna type                                                            | epidermolysis bullosa simplex, oyna type                                                            | 2.77E-02 | PLEC                   | 1 |

|                                        |                                                       |                                                               |          |                                             |   |
|----------------------------------------|-------------------------------------------------------|---------------------------------------------------------------|----------|---------------------------------------------|---|
| Dermatological Diseases and Conditions | nodular basal cell carcinoma                          | nodular basal cell carcinoma                                  | 2.77E-02 | SMO                                         | 1 |
| Dermatological Diseases and Conditions | progeroid form Ehlers-Danlos syndrome                 | progeroid form Ehlers-Danlos syndrome                         | 2.77E-02 | B4GALT7                                     | 1 |
| Organismal Injury and Abnormalities    | Ehlers-Danlos syndrome                                | Ehlers-Danlos syndrome                                        | 4.90E-03 | B4GALT7, COL1A2, PLOD1                      | 3 |
| Organismal Injury and Abnormalities    | atrophy                                               | atrophy of myofiber                                           | 2.77E-02 | FOXO3                                       | 1 |
| Organismal Injury and Abnormalities    | atrophy                                               | atrophy of myotube                                            | 2.77E-02 | FOXO3                                       | 1 |
| Organismal Injury and Abnormalities    | bilateral frontoparietal polymicrogyria               | bilateral frontoparietal polymicrogyria                       | 2.77E-02 | GPR56                                       | 1 |
| Organismal Injury and Abnormalities    | epidermolysis bullosa simplex with muscular dystrophy | epidermolysis bullosa simplex with muscular dystrophy         | 2.77E-02 | PLEC                                        | 1 |
| Organismal Injury and Abnormalities    | epidermolysis bullosa simplex, ogna type              | epidermolysis bullosa simplex, ogna type                      | 2.77E-02 | PLEC                                        | 1 |
| Organismal Injury and Abnormalities    | idiopathic basal ganglia calcification type 3         | idiopathic basal ganglia calcification type 3                 | 2.77E-02 | SLC20A2                                     | 1 |
| Organismal Injury and Abnormalities    | progeroid form Ehlers-Danlos syndrome                 | progeroid form Ehlers-Danlos syndrome                         | 2.77E-02 | B4GALT7                                     | 1 |
| Cellular Compromise                    | endoplasmic reticulum stress response                 | endoplasmic reticulum stress response                         | 5.21E-03 | CDC37, HSPA5, MGAT2, SERPINH1, TMBIM6, WFS1 | 6 |
| Cellular Compromise                    | endoplasmic reticulum stress response                 | endoplasmic reticulum stress response of cells                | 7.95E-03 | CDC37, HSPA5, MGAT2, TMBIM6                 | 4 |
| Cellular Compromise                    | endoplasmic reticulum stress response                 | endoplasmic reticulum stress response of embryonic cell lines | 1.46E-02 | CDC37, MGAT2                                | 2 |
| Cellular Compromise                    | endoplasmic reticulum stress response                 | endoplasmic reticulum stress response of kidney cell lines    | 1.46E-02 | CDC37, MGAT2                                | 2 |

|                                   |                                       |                                                                |          |                                             |   |
|-----------------------------------|---------------------------------------|----------------------------------------------------------------|----------|---------------------------------------------|---|
| Cellular Compromise               | endoplasmic reticulum stress response | endoplasmic reticulum stress response of epithelial cell lines | 2.42E-02 | CDC37, MGAT2                                | 2 |
| Cellular Compromise               | endoplasmic reticulum stress response | endoplasmic reticulum stress response of cancer cells          | 2.77E-02 | TMBIM6                                      | 1 |
| Cellular Compromise               | degradation                           | degradation of filaments                                       | 7.24E-03 | CTSK, PAK1                                  | 2 |
| Cellular Compromise               | degradation                           | degradation of amyloid fibrils                                 | 2.77E-02 | CTSK                                        | 1 |
| Cellular Compromise               | retraction                            | retraction of cellular tail                                    | 7.24E-03 | ADCY9, PAK1                                 | 2 |
| Cellular Compromise               | retraction                            | retraction of cells                                            | 2.42E-02 | CDK2, PAK1                                  | 2 |
| Cellular Compromise               | atrophy                               | atrophy of myofiber                                            | 2.77E-02 | FOXO3                                       | 1 |
| Cellular Compromise               | atrophy                               | atrophy of myotube                                             | 2.77E-02 | FOXO3                                       | 1 |
| Cellular Compromise               | degeneration                          | degeneration of striatonigral neurons                          | 2.77E-02 | SNCA                                        | 1 |
| Cellular Compromise               | development                           | development of fibrillar inclusions                            | 2.77E-02 | SNCA                                        | 1 |
| Cellular Compromise               | disruption                            | disruption of cortical actin filaments                         | 2.77E-02 | RHOQ                                        | 1 |
| Cellular Compromise               | disruption                            | disruption of fibrils                                          | 2.77E-02 | SNCA                                        | 1 |
| Cellular Compromise               | disruption                            | disruption of vesicle aggregates                               | 2.77E-02 | SNCA                                        | 1 |
| Cellular Compromise               | dysfunction                           | dysfunction of neurons                                         | 2.77E-02 | SNCA                                        | 1 |
| Cellular Compromise               | loss                                  | loss of fibrils                                                | 2.77E-02 | CAV1                                        | 1 |
| Cellular Compromise               | swelling                              | swelling of lysosome                                           | 2.77E-02 | VPS26A                                      | 1 |
| Cellular Function and Maintenance | endoplasmic reticulum stress response | endoplasmic reticulum stress response                          | 5.21E-03 | CDC37, HSPA5, MGAT2, SERPINH1, TMBIM6, WFS1 | 6 |
| Cellular Function and Maintenance | endoplasmic reticulum stress response | endoplasmic reticulum stress response of cells                 | 7.95E-03 | CDC37, HSPA5, MGAT2, TMBIM6                 | 4 |

|                                   |                                       |                                                                |          |                     |   |
|-----------------------------------|---------------------------------------|----------------------------------------------------------------|----------|---------------------|---|
| Cellular Function and Maintenance | endoplasmic reticulum stress response | endoplasmic reticulum stress response of embryonic cell lines  | 1.46E-02 | CDC37, MGAT2        | 2 |
| Cellular Function and Maintenance | endoplasmic reticulum stress response | endoplasmic reticulum stress response of kidney cell lines     | 1.46E-02 | CDC37, MGAT2        | 2 |
| Cellular Function and Maintenance | endoplasmic reticulum stress response | endoplasmic reticulum stress response of epithelial cell lines | 2.42E-02 | CDC37, MGAT2        | 2 |
| Cellular Function and Maintenance | endoplasmic reticulum stress response | endoplasmic reticulum stress response of cancer cells          | 2.77E-02 | TMBIM6              | 1 |
| Cellular Function and Maintenance | repair                                | repair of colon cancer cell lines                              | 7.24E-03 | CHEK1, UBE2N        | 2 |
| Cellular Function and Maintenance | autophagy                             | autophagy of bone cancer cell lines                            | 1.46E-02 | ATG7, RELA          | 2 |
| Cellular Function and Maintenance | formation                             | formation of macropinosomes                                    | 2.77E-02 | WASF2               | 1 |
| Cellular Function and Maintenance | formation                             | formation of microtubules                                      | 3.09E-02 | DPYSL2, PSRC1, TBCD | 3 |
| Cellular Function and Maintenance | localization                          | localization of focal adhesions                                | 2.77E-02 | PTK2                | 1 |
| Cellular Function and Maintenance | mineralization                        | mineralization of bone cancer cell lines                       | 2.77E-02 | SNCA                | 1 |
| Cellular Function and Maintenance | pH                                    | pH of neurons                                                  | 2.77E-02 | L1CAM               | 1 |
| Cellular Function and Maintenance | pH                                    | pH of cells                                                    | 4.88E-02 | L1CAM, SLC9A1       | 2 |
| Cellular Function and             | polymerization                        | polymerization of actin stress fibers                          | 2.77E-02 | PAK1                | 1 |

|                                   |                 |                                          |          |                                        |   |
|-----------------------------------|-----------------|------------------------------------------|----------|----------------------------------------|---|
| Maintenance                       |                 |                                          |          |                                        |   |
| Cellular Function and Maintenance | import          | import of D-glucose                      | 2.77E-02 | IRS2, RHOQ, SORT1                      | 3 |
| Lipid Metabolism                  | synthesis       | synthesis of cholesterol                 | 6.11E-03 | CAV1, DHCR24, DHCR7                    | 3 |
| Lipid Metabolism                  | synthesis       | synthesis of sphingomyelin               | 1.07E-02 | OSBP, SLC27A1                          | 2 |
| Lipid Metabolism                  | synthesis       | synthesis of glycolipid                  | 1.42E-02 | MPDU1, OSBP, SLC27A1, ST3GAL5, ST8SIA5 | 5 |
| Lipid Metabolism                  | synthesis       | synthesis of phosphatidylserine          | 2.77E-02 | SLC27A1                                | 1 |
| Lipid Metabolism                  | synthesis       | synthesis of glycosphingolipid           | 3.79E-02 | OSBP, SLC27A1, ST3GAL5, ST8SIA5        | 4 |
| Lipid Metabolism                  | phosphorylation | phosphorylation of phosphatidic acid     | 2.42E-02 | AGK, PIK3CB                            | 2 |
| Lipid Metabolism                  | phosphorylation | phosphorylation of diacylglycerol        | 2.77E-02 | AGK                                    | 1 |
| Lipid Metabolism                  | phosphorylation | phosphorylation of lysophosphatidic acid | 2.77E-02 | AGK                                    | 1 |
| Lipid Metabolism                  | accumulation    | accumulation of 2-arachidonoylglycerol   | 2.77E-02 | MGLL                                   | 1 |
| Lipid Metabolism                  | biosynthesis    | biosynthesis of dolichol monophosphate   | 2.77E-02 | DOLK                                   | 1 |
| Lipid Metabolism                  | biosynthesis    | biosynthesis of phosphatidylglycerol     | 2.77E-02 | SLC27A1                                | 1 |
| Lipid Metabolism                  | incorporation   | incorporation of lignoceric acid         | 2.77E-02 | SLC27A1                                | 1 |
| Lipid Metabolism                  | secretion       | secretion of lysophosphatidic acid       | 2.77E-02 | AGK                                    | 1 |
| Lipid Metabolism                  | trafficking     | trafficking of cholesterol               | 2.77E-02 | CAV1                                   | 1 |
| Lipid Metabolism                  | tubulation      | tubulation of lipid                      | 2.77E-02 | MX1                                    | 1 |
| Small Molecule Biochemistry       | synthesis       | synthesis of cholesterol                 | 6.11E-03 | CAV1, DHCR24, DHCR7                    | 3 |
| Small Molecule Biochemistry       | synthesis       | synthesis of sphingomyelin               | 1.07E-02 | OSBP, SLC27A1                          | 2 |

|                             |                 |                                          |          |                                        |   |
|-----------------------------|-----------------|------------------------------------------|----------|----------------------------------------|---|
| Small Molecule Biochemistry | synthesis       | synthesis of glycolipid                  | 1.42E-02 | MPDU1, OSBP, SLC27A1, ST3GAL5, ST8SIA5 | 5 |
| Small Molecule Biochemistry | synthesis       | synthesis of phosphatidylserine          | 2.77E-02 | SLC27A1                                | 1 |
| Small Molecule Biochemistry | synthesis       | synthesis of spermidine                  | 2.77E-02 | SRM                                    | 1 |
| Small Molecule Biochemistry | synthesis       | synthesis of glycosphingolipid           | 3.79E-02 | OSBP, SLC27A1, ST3GAL5, ST8SIA5        | 4 |
| Small Molecule Biochemistry | binding         | binding of ATP                           | 1.92E-02 | HSPBP1, NR1H2                          | 2 |
| Small Molecule Biochemistry | binding         | binding of haloperidol                   | 2.77E-02 | SIGMAR1                                | 1 |
| Small Molecule Biochemistry | phosphorylation | phosphorylation of phosphatidic acid     | 2.42E-02 | AGK, PIK3CB                            | 2 |
| Small Molecule Biochemistry | phosphorylation | phosphorylation of diacylglycerol        | 2.77E-02 | AGK                                    | 1 |
| Small Molecule Biochemistry | phosphorylation | phosphorylation of lysophosphatidic acid | 2.77E-02 | AGK                                    | 1 |
| Small Molecule Biochemistry | phosphorylation | phosphorylation of L-threonine           | 4.88E-02 | CDK5R1, CHEK1                          | 2 |
| Small Molecule Biochemistry | accumulation    | accumulation of 2-arachidonoylglycerol   | 2.77E-02 | MGLL                                   | 1 |
| Small Molecule Biochemistry | accumulation    | accumulation of UDP-D-glucose            | 2.77E-02 | GALE                                   | 1 |
| Small Molecule Biochemistry | accumulation    | accumulation of UDP-N-acetylglucosamine  | 2.77E-02 | GALE                                   | 1 |
| Small Molecule Biochemistry | accumulation    | accumulation of UDP-galactose            | 2.77E-02 | GALE                                   | 1 |
| Small Molecule Biochemistry | biosynthesis    | biosynthesis of dolichol monophosphate   | 2.77E-02 | DOLK                                   | 1 |
| Small Molecule Biochemistry | biosynthesis    | biosynthesis of hydroxylysine            | 2.77E-02 | PLOD1                                  | 1 |
| Small Molecule Biochemistry | biosynthesis    | biosynthesis of phosphatidylglycerol     | 2.77E-02 | SLC27A1                                | 1 |
| Small Molecule Biochemistry | branching       | branching of N-glycan                    | 2.77E-02 | CAV1                                   | 1 |
| Small Molecule Biochemistry | catabolism      | catabolism of galactose                  | 2.77E-02 | GALE                                   | 1 |

|                             |                 |                                              |          |                   |   |
|-----------------------------|-----------------|----------------------------------------------|----------|-------------------|---|
| Small Molecule Biochemistry | conjugation     | conjugation of histamine                     | 2.77E-02 | TGM2              | 1 |
| Small Molecule Biochemistry | deamination     | deamination of adenosine                     | 2.77E-02 | ADAT1             | 1 |
| Small Molecule Biochemistry | deamination     | deamination of dCMP                          | 2.77E-02 | DCTD              | 1 |
| Small Molecule Biochemistry | decarboxylation | decarboxylation of L-glutamic acid           | 2.77E-02 | GAD1              | 1 |
| Small Molecule Biochemistry | incorporation   | incorporation of lignoceric acid             | 2.77E-02 | SLC27A1           | 1 |
| Small Molecule Biochemistry | secretion       | secretion of lysophosphatidic acid           | 2.77E-02 | AGK               | 1 |
| Small Molecule Biochemistry | trafficking     | trafficking of cholesterol                   | 2.77E-02 | CAV1              | 1 |
| Small Molecule Biochemistry | transamidation  | transamidation of histamine                  | 2.77E-02 | TGM2              | 1 |
| Small Molecule Biochemistry | transport       | transport of dADP                            | 2.77E-02 | SLC25A19          | 1 |
| Small Molecule Biochemistry | transport       | transport of dATP                            | 2.77E-02 | SLC25A19          | 1 |
| Small Molecule Biochemistry | transport       | transport of dCDP                            | 2.77E-02 | SLC25A19          | 1 |
| Small Molecule Biochemistry | transport       | transport of dGDP                            | 2.77E-02 | SLC25A19          | 1 |
| Small Molecule Biochemistry | transport       | transport of dGTP                            | 2.77E-02 | SLC25A19          | 1 |
| Small Molecule Biochemistry | transport       | transport of dTTP                            | 2.77E-02 | SLC25A19          | 1 |
| Small Molecule Biochemistry | transport       | transport of deoxycytidine triphosphate      | 2.77E-02 | SLC25A19          | 1 |
| Small Molecule Biochemistry | transport       | transport of phosphoadenosine phosphosulfate | 2.77E-02 | SLC35B2           | 1 |
| Small Molecule Biochemistry | tubulation      | tubulation of lipid                          | 2.77E-02 | MX1               | 1 |
| Small Molecule Biochemistry | uptake          | uptake of creatine                           | 2.77E-02 | SLC6A8            | 1 |
| Small Molecule Biochemistry | import          | import of D-glucose                          | 2.77E-02 | IRS2, RHOQ, SORT1 | 3 |



|                             |                            |                                                          |          |                                                                                                        |    |
|-----------------------------|----------------------------|----------------------------------------------------------|----------|--------------------------------------------------------------------------------------------------------|----|
| Small Molecule Biochemistry | quantity                   | quantity of monoamines                                   | 4.20E-02 | RAF1, SNCA                                                                                             | 2  |
| Cell Cycle                  | G1 phase                   | arrest in G1 phase of lung cancer cell lines             | 7.00E-03 | NOTCH2, RAF1, RFFL, TUSC2                                                                              | 4  |
| Cell Cycle                  | G1 phase                   | arrest in G1 phase                                       | 4.13E-02 | CAMKK2, CDK2, NOTCH2, PSEN2, RAF1, RFFL, SKP2, SP1, TCF12, TUSC2                                       | 10 |
| Cell Cycle                  | interphase                 | arrest in interphase of lung cancer cell lines           | 8.56E-03 | CHEK1, NOTCH2, RAF1, RFFL, TUSC2                                                                       | 5  |
| Cell Cycle                  | interphase                 | arrest in interphase of epithelial cells                 | 1.46E-02 | CHEK1, SP1                                                                                             | 2  |
| Cell Cycle                  | interphase                 | arrest in interphase                                     | 3.74E-02 | AGK, ATF5, CAMKK2, CDK2, CHEK1, FOXO3, KDM5B, NOTCH2, PSEN2, RAF1, RFFL, SKP2, SP1, TCF12, TUSC2       | 15 |
| Cell Cycle                  | interphase                 | interphase of tumor cell lines                           | 4.13E-02 | AGK, ATF5, CAMKK2, CDK2, CHEK1, FOXO3, MT1A, NOTCH2, PKMYT1, PSEN2, RAF1, RFFL, SKP2, SP1, TGFA, TUSC2 | 16 |
| Cell Cycle                  | interphase                 | interphase of prostate cancer cell lines                 | 4.52E-02 | AGK, SKP2, SP1                                                                                         | 3  |
| Cell Cycle                  | senescence                 | senescence of lung cell lines                            | 1.01E-02 | CAV1, MCRS1, RAF1, RELA                                                                                | 4  |
| Cell Cycle                  | S phase                    | re-entry into S phase                                    | 1.69E-02 | CDK2, SKP2, TGFA                                                                                       | 3  |
| Cell Cycle                  | S phase                    | S phase of tumor cell lines                              | 2.10E-02 | AGK, CDK2, CHEK1, FOXO3, RAF1, SKP2, TGFA                                                              | 7  |
| Cell Cycle                  | S phase                    | initiation of S phase of fibroblasts                     | 2.77E-02 | SKP2                                                                                                   | 1  |
| Cell Cycle                  | S phase                    | S phase of prostate cancer cell lines                    | 2.97E-02 | AGK, SKP2                                                                                              | 2  |
| Cell Cycle                  | S phase                    | re-entry into S phase of tumor cell lines                | 4.88E-02 | CDK2, TGFA                                                                                             | 2  |
| Cell Cycle                  | S phase checkpoint control | S phase checkpoint control of tumor cell lines           | 2.42E-02 | CHEK1, CKS2                                                                                            | 2  |
| Cell Cycle                  | S phase checkpoint control | S phase checkpoint control of breast cancer cell lines   | 2.77E-02 | CKS2                                                                                                   | 1  |
| Cell Cycle                  | S phase checkpoint control | S phase checkpoint control of lymphoblastoid cell lines  | 2.77E-02 | CHEK1                                                                                                  | 1  |
| Cell Cycle                  | DNA replication checkpoint | DNA replication checkpoint of cervical cancer cell lines | 2.77E-02 | CHEK1                                                                                                  | 1  |
| Cell Cycle                  | DNA replication checkpoint | DNA replication checkpoint of colon cancer cell lines    | 2.77E-02 | CHEK1                                                                                                  | 1  |
| Cell Cycle                  | G0/G1 phase transition     | arrest in G0/G1 phase transition of myeloma cell lines   | 2.77E-02 | CHEK1                                                                                                  | 1  |
| Cell Cycle                  | G2/M phase                 | entry into G2/M phase of bone cancer cell lines          | 2.77E-02 | PKMYT1                                                                                                 | 1  |
| Cell Cycle                  | G2/M phase transition      | arrest in G2/M phase transition of hepatoma cell lines   | 2.77E-02 | ATF5                                                                                                   | 1  |

|                      |                                   |                                                                   |          |                                                                                          |    |
|----------------------|-----------------------------------|-------------------------------------------------------------------|----------|------------------------------------------------------------------------------------------|----|
| Cell Cycle           | aneuploidization                  | aneuploidization of tumor cell lines                              | 2.77E-02 | MCRS1                                                                                    | 1  |
| Cell Cycle           | cleavage                          | arrest in cleavage of blastomeres                                 | 2.77E-02 | RAF1                                                                                     | 1  |
| Cell Cycle           | homologous recombination          | homologous recombination of gene                                  | 2.77E-02 | CDK2                                                                                     | 1  |
| Cell Cycle           | late G1 phase                     | late G1 phase of colon cancer cell lines                          | 2.77E-02 | MT1A                                                                                     | 1  |
| Cell Cycle           | mitosis                           | arrest in mitosis of prostate cancer cell lines                   | 2.77E-02 | CHEK1                                                                                    | 1  |
| Cell Cycle           | mitosis                           | entry into mitosis of bone cancer cell lines                      | 2.77E-02 | PKMYT1                                                                                   | 1  |
| Cell Cycle           | mitosis                           | entry into mitosis of pancreatic cancer cell lines                | 2.77E-02 | CHEK1                                                                                    | 1  |
| Cell Cycle           | ploidy                            | ploidy of bladder cancer cell lines                               | 2.77E-02 | UBIAD1                                                                                   | 1  |
| Cell Cycle           | premature senescence              | premature senescence of fibrosarcoma cell lines                   | 2.77E-02 | MCRS1                                                                                    | 1  |
| Cell Cycle           | cell cycle progression            | cell cycle progression of lymphoblastoid cell lines               | 3.57E-02 | CASP2, PSEN2                                                                             | 2  |
| Cellular Development | epithelial-mesenchymal transition | epithelial-mesenchymal transition of pancreatic cancer cell lines | 7.24E-03 | CAV1, SP1                                                                                | 2  |
| Cellular Development | senescence                        | senescence of lung cell lines                                     | 1.01E-02 | CAV1, MCRS1, RAF1, RELA                                                                  | 4  |
| Cellular Development | proliferation                     | proliferation of lung cancer cell lines                           | 1.50E-02 | CASP2, CAV1, CDK2, CHEK1, EPB41L3, NOTCH2, PIK3CB, RAF1, RELA, SKP2, STMN3, TUSC2, UHRF1 | 13 |
| Cellular Development | proliferation                     | proliferation of fibroblast cell lines                            | 1.65E-02 | CBL, FOXO3, PTK2, RAF1, TGM2                                                             | 5  |
| Cellular Development | proliferation                     | proliferation of lung cancer cells                                | 3.57E-02 | CAV1, SKP2                                                                               | 2  |
| Cellular Development | proliferation                     | proliferation of hepatocytes                                      | 4.20E-02 | SKP2, TGFA                                                                               | 2  |
| Cellular Development | branching                         | branching of N-glycan                                             | 2.77E-02 | CAV1                                                                                     | 1  |
| Cellular Development | clonal expansion                  | clonal expansion of myeloma cell lines                            | 2.77E-02 | SMO                                                                                      | 1  |
| Cellular Development | colony formation                  | colony formation of non-small-cell lung cancer cells              | 2.77E-02 | CAV1                                                                                     | 1  |
| Cellular Development | colony formation                  | colony formation of small cell lung cancer cells                  | 2.77E-02 | CAV1                                                                                     | 1  |

|                                             |                        |                                         |          |                                                                                   |    |
|---------------------------------------------|------------------------|-----------------------------------------|----------|-----------------------------------------------------------------------------------|----|
| Cellular Development                        | quantity               | quantity of carcinoma cells             | 2.77E-02 | FOXO3                                                                             | 1  |
| Cellular Development                        | tubulation             | delay in tubulation of epithelial cells | 2.77E-02 | RGS4                                                                              | 1  |
| Cellular Development                        | tubulation             | tubulation of HAEC cells                | 2.77E-02 | RAF1                                                                              | 1  |
| Embryonic Development                       | apoptosis              | apoptosis of embryonic cell lines       | 7.45E-03 | CASP2, HSPA5, NRGN, PAK2, PRMT2, RGS4, SDHC, SNCA, TCF12, VDAC1, VOPP1            | 11 |
| Embryonic Development                       | binding                | binding of embryonic cell lines         | 3.09E-02 | CAV1, SDC4, SORT1                                                                 | 3  |
| Embryonic Development                       | cell death             | cell death of embryonic cell lines      | 3.17E-02 | ATG7, CASP2, HSPA5, NRGN, PAK2, PRMT2, RGS4, SDHC, SNCA, TCF12, VDAC1, VOPP1      | 12 |
| Post-Translational Modification             | ubiquitination         | ubiquitination                          | 8.45E-03 | BIRC7, CBL, HSPBP1, KLHL21, NDFIP2, RNF20, RNF5, RUSC1, SKP1/SKP1P2, UBE2N, UBE3C | 11 |
| Post-Translational Modification             | ubiquitination         | ubiquitination of protein               | 1.93E-02 | BIRC7, CBL, HSPBP1, KLHL21, NDFIP2, RNF20, RUSC1, SKP1/SKP1P2, UBE2N, UBE3C       | 10 |
| Post-Translational Modification             | methylation            | methylation of protein                  | 2.42E-02 | EPB41L3, PRMT2                                                                    | 2  |
| Post-Translational Modification             | decarboxylation        | decarboxylation of L-glutamic acid      | 2.77E-02 | GAD1                                                                              | 1  |
| Post-Translational Modification             | hydroxylation          | hydroxylation of protein fragment       | 2.77E-02 | PLOD1                                                                             | 1  |
| Post-Translational Modification             | polyubiquitination     | polyubiquitination                      | 4.33E-02 | RNF20, RUSC1, UBE2N, UBE3C                                                        | 4  |
| Post-Translational Modification             | phosphorylation        | phosphorylation of L-threonine          | 4.88E-02 | CDK5R1, CHEK1                                                                     | 2  |
| Respiratory System Development and Function | senescence             | senescence of lung cell lines           | 1.01E-02 | CAV1, MCRS1, RAF1, RELA                                                           | 4  |
| Cancer                                      | extrahepatic bile duct | extrahepatic bile duct cancer           | 1.07E-02 | POLE3, POLE4                                                                      | 2  |

|        |                              |                              |          |                                                                                                                                                                                                                                                                                                                                                                                                                                                                                                                                                                                                                                                                                                                                                                                                                                                                                                                               |     |
|--------|------------------------------|------------------------------|----------|-------------------------------------------------------------------------------------------------------------------------------------------------------------------------------------------------------------------------------------------------------------------------------------------------------------------------------------------------------------------------------------------------------------------------------------------------------------------------------------------------------------------------------------------------------------------------------------------------------------------------------------------------------------------------------------------------------------------------------------------------------------------------------------------------------------------------------------------------------------------------------------------------------------------------------|-----|
|        | cancer                       |                              |          |                                                                                                                                                                                                                                                                                                                                                                                                                                                                                                                                                                                                                                                                                                                                                                                                                                                                                                                               |     |
| Cancer | metastasis                   | metastasis                   | 1.29E-02 | CAV1, DPYSL2, DSG2, EMX2, EPB41L3, GNA12, GREB1, GYG2, MITF, POLE3, POLE4, PTK2, RAF1, RGS4, SEL1L3, SMO, TCF12                                                                                                                                                                                                                                                                                                                                                                                                                                                                                                                                                                                                                                                                                                                                                                                                               | 17  |
| Cancer | early-onset breast cancer    | early-onset breast cancer    | 1.46E-02 | CHEK1, EI24                                                                                                                                                                                                                                                                                                                                                                                                                                                                                                                                                                                                                                                                                                                                                                                                                                                                                                                   | 2   |
| Cancer | transformation               | cell transformation          | 2.29E-02 | CBL, HYAL2, L1CAM, PIK3CB, RAF1, RELA, SIRPA, SKP2                                                                                                                                                                                                                                                                                                                                                                                                                                                                                                                                                                                                                                                                                                                                                                                                                                                                            | 8   |
| Cancer | skin squamous cell carcinoma | skin squamous cell carcinoma | 2.47E-02 | CAV1, HSPA5, TGFA                                                                                                                                                                                                                                                                                                                                                                                                                                                                                                                                                                                                                                                                                                                                                                                                                                                                                                             | 3   |
| Cancer | metastatic colorectal cancer | metastatic colorectal cancer | 2.48E-02 | CAV1, DPYSL2, DSG2, EMX2, EPB41L3, GREB1, GYG2, RGS4, SEL1L3, TCF12                                                                                                                                                                                                                                                                                                                                                                                                                                                                                                                                                                                                                                                                                                                                                                                                                                                           | 10  |
| Cancer | cancer                       | liver cancer                 | 2.75E-02 | ATF5, ATP1B3, CASP2, CKS2, ETV4, FAM83D, GPAA1, HSPA5, MCRC1, MT2A, PAK1, PAQR4, PLK4, POLE3, POLE4, PPP1R3C, RAF1, RELA, SERF2, SMO, TRIM8                                                                                                                                                                                                                                                                                                                                                                                                                                                                                                                                                                                                                                                                                                                                                                                   | 21  |
| Cancer | cancer                       | Cancer                       | 3.34E-02 | ACTR3, ADAM19, ADCK2, AKR7A2, ARF4, ARHGAP1, ATF5, ATP1B3, BIRC7, BRWD1, CALM1 (includes others), CANT1, CAPN5, CASP2, CALM1, CBL, CD99L2, CDK2, CDK5R1, CHEK1, CKS2, CMTM4, CMTM8, CNRIP1, COL1A2, COMMD7, CTDSPL, CTSK, CXXC5, DBNL, DHCR24, DNAJC15, DPYSL2, DSG2, ECE2, EI24, EIF2AK1, EIF2S3, ELK1, EMX2, ENO2, EPB41L3, ETV4, EXTL3, FAM46C, FAM83D, FOXO3, FYCO1, GAB2, GAD1, GALE, GIT1, GLO1, GNA12, GPAA1, GREB1, GYG2, HRK, HSPA5, IGSF3, ILF3, L1CAM, LAD1, LYPLA2, MAU2, MAZ, MCRC1, MFSD5, MGLL, MICALL1, MITF, MKNK2, MT1X, MT2A, NEU1, NOTCH2, NPRL3, NPTX1, OLFML2A, PAK1, PAK2, PAQR4, PDE7B, PDXDC1, PDXK, PEX19, PHF16, PI15, PLAGL2, PLEC, PLK4, POLE3, POLE4, PPARGC1A, PPP1R3C, PRKRIR, PSEN2, PSME3, PTK2, RABL6, RAF1, RELA, RGS4, RNF144A, RNF181, RNF5, RPL15, SCARB2, SDHC, SEL1L3, SERF2, SGK223, SH2B3, SIGMAR1, SKP1/SKP1P2, SKP2, SLC27A1, SLC35A4, SLC44A1, SLC6A8, SLC7A1, SMO, SORT1, SRM, | 144 |

|                          |                                                                                |                                                                                |          |                                                                                                                                             |    |
|--------------------------|--------------------------------------------------------------------------------|--------------------------------------------------------------------------------|----------|---------------------------------------------------------------------------------------------------------------------------------------------|----|
|                          |                                                                                |                                                                                |          | STMN3, STOM, TAPBP, TBC1D2B, TCF12, TGFA, TGM2, TIMP3, TMC6, TMEM158, TMEM97, TRIB1, TRIM8, TXLNA, UBXN2B, UHRF1, URB2, WFS1, XYLT1, ZBTB4  |    |
| Cancer                   | activation                                                                     | activation of B-cell non-Hodgkin lymphoma                                      | 2.77E-02 | TXLNA                                                                                                                                       | 1  |
| Cancer                   | aneuploidization                                                               | aneuploidization of tumor cell lines                                           | 2.77E-02 | MCRS1                                                                                                                                       | 1  |
| Cancer                   | centroblastic lymphoma                                                         | centroblastic lymphoma                                                         | 2.77E-02 | CASP2                                                                                                                                       | 1  |
| Cancer                   | chemosensitivity                                                               | chemosensitivity of melanoma cell lines                                        | 2.77E-02 | MITF                                                                                                                                        | 1  |
| Cancer                   | endoplasmic reticulum stress response                                          | endoplasmic reticulum stress response of cancer cells                          | 2.77E-02 | TMBIM6                                                                                                                                      | 1  |
| Cancer                   | invasion                                                                       | invasion of nasopharyngeal carcinoma cells                                     | 2.77E-02 | GNA12                                                                                                                                       | 1  |
| Cancer                   | mammary adenocarcinoma                                                         | mammary adenocarcinoma                                                         | 2.77E-02 | RABL6                                                                                                                                       | 1  |
| Cancer                   | nodular basal cell carcinoma                                                   | nodular basal cell carcinoma                                                   | 2.77E-02 | SMO                                                                                                                                         | 1  |
| Cancer                   | sphere formation                                                               | sphere formation of ovarian cancer cell lines                                  | 2.77E-02 | TGM2                                                                                                                                        | 1  |
| Cancer                   | stimulation                                                                    | stimulation of chronic lymphocytic leukemia cells                              | 2.77E-02 | TXLNA                                                                                                                                       | 1  |
| Cancer                   | infection                                                                      | infection of leukemia cell lines                                               | 4.88E-02 | PAK1, TYRO3                                                                                                                                 | 2  |
| Gastrointestinal Disease | extrahepatic bile duct cancer                                                  | extrahepatic bile duct cancer                                                  | 1.07E-02 | POLE3, POLE4                                                                                                                                | 2  |
| Gastrointestinal Disease | metastatic colorectal cancer                                                   | metastatic colorectal cancer                                                   | 2.48E-02 | CAV1, DPYSL2, DSG2, EMX2, EPB41L3, GREB1, GYG2, RGS4, SEL1L3, TCF12                                                                         | 10 |
| Gastrointestinal Disease | cancer                                                                         | liver cancer                                                                   | 2.75E-02 | ATF5, ATP1B3, CASP2, CKS2, ETV4, FAM83D, GPAA1, HSPA5, MCRS1, MT2A, PAK1, PAQR4, PLK4, POLE3, POLE4, PPP1R3C, RAF1, RELA, SERF2, SMO, TRIM8 | 21 |
| Gastrointestinal Disease | Alagille syndrome 2                                                            | Alagille syndrome 2                                                            | 2.77E-02 | NOTCH2                                                                                                                                      | 1  |
| Gastrointestinal Disease | X-linked hydrocephalus with congenital idiopathic intestinal pseudoobstruction | X-linked hydrocephalus with congenital idiopathic intestinal pseudoobstruction | 2.77E-02 | L1CAM                                                                                                                                       | 1  |

|                          |                                     |                                          |          |                                                                                                                                             |    |
|--------------------------|-------------------------------------|------------------------------------------|----------|---------------------------------------------------------------------------------------------------------------------------------------------|----|
| Gastrointestinal Disease | insulin-dependent diabetes mellitus | insulin-dependent diabetes mellitus      | 4.52E-02 | AGPAT1, COL1A2, DYM, HCP5, HMGN4, PPP1R11, RAB5B, RNF5, RSNB1, SH2B3, WFS1                                                                  | 11 |
| Hepatic System Disease   | extrahepatic bile duct cancer       | extrahepatic bile duct cancer            | 1.07E-02 | POLE3, POLE4                                                                                                                                | 2  |
| Hepatic System Disease   | cancer                              | liver cancer                             | 2.75E-02 | ATF5, ATP1B3, CASP2, CKS2, ETV4, FAM83D, GPAA1, HSPA5, MCRS1, MT2A, PAK1, PAQR4, PLK4, POLE3, POLE4, PPP1R3C, RAF1, RELA, SERF2, SMO, TRIM8 | 21 |
| Hepatic System Disease   | Alagille syndrome 2                 | Alagille syndrome 2                      | 2.77E-02 | NOTCH2                                                                                                                                      | 1  |
| Carbohydrate Metabolism  | accumulation                        | accumulation of glycosides               | 1.46E-02 | DNAJC15, GALE                                                                                                                               | 2  |
| Carbohydrate Metabolism  | accumulation                        | accumulation of UDP-D-glucose            | 2.77E-02 | GALE                                                                                                                                        | 1  |
| Carbohydrate Metabolism  | accumulation                        | accumulation of UDP-N-acetylglucosamine  | 2.77E-02 | GALE                                                                                                                                        | 1  |
| Carbohydrate Metabolism  | accumulation                        | accumulation of UDP-galactose            | 2.77E-02 | GALE                                                                                                                                        | 1  |
| Carbohydrate Metabolism  | metabolism                          | metabolism of carbohydrate               | 1.72E-02 | AGK, AGPAT1, AKR7A2, B4GALT7, COG2, GALE, HYAL2, IRS2, MGAT2, MPDU1, RGS4, SLC27A1, SNCA, ST3GAL5, ST8SIA5, XYLT1                           | 16 |
| Carbohydrate Metabolism  | phosphorylation                     | phosphorylation of phosphatidic acid     | 2.42E-02 | AGK, PIK3CB                                                                                                                                 | 2  |
| Carbohydrate Metabolism  | phosphorylation                     | phosphorylation of lysophosphatidic acid | 2.77E-02 | AGK                                                                                                                                         | 1  |
| Carbohydrate Metabolism  | biosynthesis                        | biosynthesis of phosphatidylglycerol     | 2.77E-02 | SLC27A1                                                                                                                                     | 1  |
| Carbohydrate Metabolism  | branching                           | branching of N-glycan                    | 2.77E-02 | CAV1                                                                                                                                        | 1  |
| Carbohydrate Metabolism  | catabolism                          | catabolism of galactose                  | 2.77E-02 | GALE                                                                                                                                        | 1  |
| Carbohydrate Metabolism  | secretion                           | secretion of lysophosphatidic acid       | 2.77E-02 | AGK                                                                                                                                         | 1  |
| Carbohydrate Metabolism  | synthesis                           | synthesis of phosphatidylserine          | 2.77E-02 | SLC27A1                                                                                                                                     | 1  |
| Carbohydrate Metabolism  | synthesis                           | synthesis of carbohydrate                | 4.13E-02 | AGK, AGPAT1, B4GALT7, COG2, IRS2, MPDU1, RGS4, SLC27A1, SNCA, XYLT1                                                                         | 10 |
| Carbohydrate             | synthesis                           | synthesis of oligosaccharide             | 4.20E-02 | COG2, MPDU1                                                                                                                                 | 2  |

|                                   |                                     |                                                      |          |                                                                                                         |    |
|-----------------------------------|-------------------------------------|------------------------------------------------------|----------|---------------------------------------------------------------------------------------------------------|----|
| Metabolism                        |                                     |                                                      |          |                                                                                                         |    |
| Carbohydrate Metabolism           | import                              | import of D-glucose                                  | 2.77E-02 | IRS2, RHOQ, SORT1                                                                                       | 3  |
| Endocrine System Disorders        | glucose intolerance                 | glucose intolerance                                  | 1.46E-02 | PSEN2, WFS1                                                                                             | 2  |
| Endocrine System Disorders        | insulin-dependent diabetes mellitus | insulin-dependent diabetes mellitus                  | 4.52E-02 | AGPAT1, COL1A2, DYM, HCP5, HMGN4, PPP1R11, RAB5B, RNF5, RSNB1, SH2B3, WFS1                              | 11 |
| Cellular Growth and Proliferation | proliferation                       | proliferation of lung cancer cell lines              | 1.50E-02 | CASP2, CAV1, CDK2, CHEK1, EPB41L3, NOTCH2, PIK3CB, RAF1, RELA, SKP2, STMN3, TUSC2, UHRF1                | 13 |
| Cellular Growth and Proliferation | proliferation                       | proliferation of fibroblast cell lines               | 1.65E-02 | CBL, FOXO3, PTK2, RAF1, TGM2                                                                            | 5  |
| Cellular Growth and Proliferation | proliferation                       | proliferation of lung cancer cells                   | 3.57E-02 | CAV1, SKP2                                                                                              | 2  |
| Cellular Growth and Proliferation | proliferation                       | proliferation of hepatocytes                         | 4.20E-02 | SKP2, TGFA                                                                                              | 2  |
| Cellular Growth and Proliferation | colony formation                    | colony formation of lung cancer cell lines           | 1.54E-02 | CADM1, PSRC1, RFFL, TUSC2                                                                               | 4  |
| Cellular Growth and Proliferation | colony formation                    | colony formation of tumor cell lines                 | 2.22E-02 | ATG7, CADM1, CAV1, CBL, FOXO3, MITF, MT1X, PAK1, PSRC1, RELA, RFFL, SP1, TUSC2                          | 13 |
| Cellular Growth and Proliferation | colony formation                    | colony formation                                     | 2.30E-02 | ATG7, CADM1, CAV1, CBL, CHEK1, EI24, FOXO3, GIT1, MITF, MT1X, PAK1, PSRC1, RAF1, RELA, RFFL, SP1, TUSC2 | 17 |
| Cellular Growth and Proliferation | colony formation                    | colony formation of non-small-cell lung cancer cells | 2.77E-02 | CAV1                                                                                                    | 1  |
| Cellular Growth and Proliferation | colony formation                    | colony formation of small cell lung cancer cells     | 2.77E-02 | CAV1                                                                                                    | 1  |
| Cellular Growth and               | colony formation                    | colony formation of cells                            | 3.71E-02 | ATG7, CADM1, CAV1, CBL, CHEK1, EI24, FOXO3, MITF, MT1X, PAK1, PSRC1, RAF1, RELA, RFFL,                  | 16 |

|                                   |                                   |                                                   |          |                                                                      |   |
|-----------------------------------|-----------------------------------|---------------------------------------------------|----------|----------------------------------------------------------------------|---|
| Proliferation                     |                                   |                                                   |          | SP1, TUSC2                                                           |   |
| Cellular Growth and Proliferation | clonal expansion                  | clonal expansion of myeloma cell lines            | 2.77E-02 | SMO                                                                  | 1 |
| Cellular Growth and Proliferation | excitation                        | excitation of hippocampal neurons                 | 2.77E-02 | SNCA                                                                 | 1 |
| Cellular Growth and Proliferation | quantity                          | quantity of carcinoma cells                       | 2.77E-02 | FOXO3                                                                | 1 |
| Cellular Growth and Proliferation | stimulation                       | stimulation of chronic lymphocytic leukemia cells | 2.77E-02 | TXLNA                                                                | 1 |
| Respiratory Disease               | infection                         | infection of respiratory tract                    | 1.59E-02 | C20orf24, FLOT2, IRS2, PDXK, PIK3CB, SH2B3, SIGMAR1, ST6GAL1, TROVE2 | 9 |
| Respiratory Disease               | severe acute respiratory syndrome | severe acute respiratory syndrome                 | 1.84E-02 | C20orf24, FLOT2, IRS2, PDXK, PIK3CB, SH2B3, ST6GAL1, TROVE2          | 8 |
| Energy Production                 | binding                           | binding of ATP                                    | 1.92E-02 | HSPBP1, NR1H2                                                        | 2 |
| Nucleic Acid Metabolism           | binding                           | binding of ATP                                    | 1.92E-02 | HSPBP1, NR1H2                                                        | 2 |
| Nucleic Acid Metabolism           | accumulation                      | accumulation of UDP-D-glucose                     | 2.77E-02 | GALE                                                                 | 1 |
| Nucleic Acid Metabolism           | accumulation                      | accumulation of UDP-N-acetylglucosamine           | 2.77E-02 | GALE                                                                 | 1 |
| Nucleic Acid Metabolism           | accumulation                      | accumulation of UDP-galactose                     | 2.77E-02 | GALE                                                                 | 1 |
| Nucleic Acid Metabolism           | deamination                       | deamination of adenosine                          | 2.77E-02 | ADAT1                                                                | 1 |
| Nucleic Acid Metabolism           | deamination                       | deamination of dCMP                               | 2.77E-02 | DCTD                                                                 | 1 |
| Nucleic Acid Metabolism           | transport                         | transport of dADP                                 | 2.77E-02 | SLC25A19                                                             | 1 |
| Nucleic Acid Metabolism           | transport                         | transport of dATP                                 | 2.77E-02 | SLC25A19                                                             | 1 |
| Nucleic Acid Metabolism           | transport                         | transport of dCDP                                 | 2.77E-02 | SLC25A19                                                             | 1 |
| Nucleic Acid                      | transport                         | transport of dGDP                                 | 2.77E-02 | SLC25A19                                                             | 1 |



|                         |                                                        |                                                        |          |                                                          |   |
|-------------------------|--------------------------------------------------------|--------------------------------------------------------|----------|----------------------------------------------------------|---|
| Metabolism              |                                                        |                                                        |          |                                                          |   |
| Nucleic Acid Metabolism | transport                                              | transport of dGTP                                      | 2.77E-02 | SLC25A19                                                 | 1 |
| Nucleic Acid Metabolism | transport                                              | transport of dTTP                                      | 2.77E-02 | SLC25A19                                                 | 1 |
| Nucleic Acid Metabolism | transport                                              | transport of deoxycytidine triphosphate                | 2.77E-02 | SLC25A19                                                 | 1 |
| Nucleic Acid Metabolism | transport                                              | transport of phosphoadenosine phosphosulfate           | 2.77E-02 | SLC35B2                                                  | 1 |
| Cardiovascular Disease  | cardiomyopathy                                         | cardiomyopathy                                         | 2.29E-02 | DSG2, PDE7B, PSEN2, SCARB2, SLC6A8, TMEM43, TRIB1, XYLT1 | 8 |
| Cardiovascular Disease  | arrhythmogenic right ventricular dysplasia             | arrhythmogenic right ventricular dysplasia             | 2.42E-02 | DSG2, TMEM43                                             | 2 |
| Cardiovascular Disease  | arrhythmogenic right ventricular dysplasia familial 10 | arrhythmogenic right ventricular dysplasia familial 10 | 2.77E-02 | DSG2                                                     | 1 |
| Cardiovascular Disease  | idiopathic basal ganglia calcification type 3          | idiopathic basal ganglia calcification type 3          | 2.77E-02 | SLC20A2                                                  | 1 |
| Amino Acid Metabolism   | biosynthesis                                           | biosynthesis of hydroxylysine                          | 2.77E-02 | PLOD1                                                    | 1 |
| Amino Acid Metabolism   | decarboxylation                                        | decarboxylation of L-glutamic acid                     | 2.77E-02 | GAD1                                                     | 1 |
| Amino Acid Metabolism   | uptake                                                 | uptake of creatine                                     | 2.77E-02 | SLC6A8                                                   | 1 |
| Amino Acid Metabolism   | phosphorylation                                        | phosphorylation of L-threonine                         | 4.88E-02 | CDK5R1, CHEK1                                            | 2 |
| Antimicrobial Response  | inhibition                                             | inhibition of Influenza virus                          | 2.77E-02 | MX1                                                      | 1 |
| Antimicrobial Response  | inhibition                                             | inhibition of Thogoto virus                            | 2.77E-02 | MX1                                                      | 1 |
| Antimicrobial Response  | inhibition                                             | inhibition of vesicular stomatitis virus               | 2.77E-02 | MX1                                                      | 1 |
| Auditory Disease        | nonsyndromic low frequency sensorineural hearing loss  | nonsyndromic low frequency sensorineural hearing loss  | 2.77E-02 | WFS1                                                     | 1 |
| Behavior                | punishment learning                                    | punishment learning                                    | 2.77E-02 | SNCA                                                     | 1 |

|                                                |                                     |                                                           |          |                                                                           |    |
|------------------------------------------------|-------------------------------------|-----------------------------------------------------------|----------|---------------------------------------------------------------------------|----|
| Behavior                                       | reward learning                     | reward learning                                           | 2.77E-02 | SNCA                                                                      | 1  |
| Cardiovascular System Development and Function | tubulation                          | tubulation of HAEC cells                                  | 2.77E-02 | RAF1                                                                      | 1  |
| Digestive System Development and Function      | morphology                          | morphology of pancreas                                    | 2.77E-02 | PSEN2                                                                     | 1  |
| Drug Metabolism                                | binding                             | binding of haloperidol                                    | 2.77E-02 | SIGMAR1                                                                   | 1  |
| Endocrine System Development and Function      | morphology                          | morphology of pancreas                                    | 2.77E-02 | PSEN2                                                                     | 1  |
| Free Radical Scavenging                        | scavenging                          | scavenging of hydrogen peroxide                           | 2.77E-02 | DHCR24                                                                    | 1  |
| Gene Expression                                | binding                             | binding of NF-IL6 response element                        | 2.77E-02 | TGFA                                                                      | 1  |
| Gene Expression                                | binding                             | binding of Tgf alpha response element                     | 2.77E-02 | TGFA                                                                      | 1  |
| Immunological Disease                          | Wiskott-Aldrich syndrome type 2     | Wiskott-Aldrich syndrome type 2                           | 2.77E-02 | WIPF1                                                                     | 1  |
| Immunological Disease                          | agammaglobulinemia type 5           | agammaglobulinemia type 5                                 | 2.77E-02 | LRRC8A                                                                    | 1  |
| Immunological Disease                          | insulin-dependent diabetes mellitus | insulin-dependent diabetes mellitus                       | 4.52E-02 | AGPAT1, COL1A2, DYM, HCP5, HMGN4, PPP1R11, RAB5B, RNF5, RSN1, SH2B3, WFS1 | 11 |
| Inflammatory Response                          | inflammatory response               | inflammatory response of monocyte-derived dendritic cells | 2.77E-02 | RELA                                                                      | 1  |
| Nervous System Development and Function        | attraction                          | attraction of axons                                       | 2.77E-02 | L1CAM                                                                     | 1  |
| Nervous System Development and Function        | contact repulsion                   | contact repulsion of axons                                | 2.77E-02 | L1CAM                                                                     | 1  |
| Nervous                                        | excitation                          | excitation of hippocampal neurons                         | 2.77E-02 | SNCA                                                                      | 1  |

|                                         |                                                     |                                                     |          |         |   |
|-----------------------------------------|-----------------------------------------------------|-----------------------------------------------------|----------|---------|---|
| System Development and Function         |                                                     |                                                     |          |         |   |
| Nervous System Development and Function | formation                                           | formation of nerve fascicle                         | 2.77E-02 | L1CAM   | 1 |
| Nervous System Development and Function | morphology                                          | morphology of synapse                               | 2.77E-02 | SNCA    | 1 |
| Nervous System Development and Function | pH                                                  | pH of neurons                                       | 2.77E-02 | L1CAM   | 1 |
| Nervous System Development and Function | quantity                                            | quantity of nerve ending                            | 2.77E-02 | SNCA    | 1 |
| Nervous System Development and Function | quantity                                            | quantity of perikaryon                              | 2.77E-02 | SNCA    | 1 |
| Organ Morphology                        | morphology                                          | morphology of pancreas                              | 2.77E-02 | PSEN2   | 1 |
| Organismal Development                  | growth                                              | growth of Influenza B virus                         | 2.77E-02 | ST6GAL1 | 1 |
| Organismal Development                  | tubulation                                          | tubulation of HAEC cells                            | 2.77E-02 | RAF1    | 1 |
| Psychological Disorders                 | Alzheimer's disease type 4                          | Alzheimer's disease type 4                          | 2.77E-02 | PSEN2   | 1 |
| Psychological Disorders                 | creatine deficiency syndrome                        | creatine deficiency syndrome                        | 2.77E-02 | SLC6A8  | 1 |
| Renal and Urological Disease            | Methylmalonic aciduria and homocystinuria cbIC type | Methylmalonic aciduria and homocystinuria cbIC type | 2.77E-02 | MMACHC  | 1 |
| Tissue Morphology                       | contraction                                         | contraction of extracellular matrix                 | 2.77E-02 | CAV1    | 1 |

|                                                      |                  |                                                      |          |                            |   |
|------------------------------------------------------|------------------|------------------------------------------------------|----------|----------------------------|---|
| Tissue Morphology                                    | degradation      | degradation of bone                                  | 2.77E-02 | CTSK                       | 1 |
| Tissue Morphology                                    | morphology       | morphology of synapse                                | 2.77E-02 | SNCA                       | 1 |
| Tissue Morphology                                    | quantity         | quantity of carcinoma cells                          | 2.77E-02 | FOXO3                      | 1 |
| Tissue Morphology                                    | quantity         | quantity of progenitor cells                         | 2.77E-02 | SH2B3                      | 1 |
| Tumor Morphology                                     | activation       | activation of B-cell non-Hodgkin lymphoma            | 2.77E-02 | TXLNA                      | 1 |
| Tumor Morphology                                     | colony formation | colony formation of non-small-cell lung cancer cells | 2.77E-02 | CAV1                       | 1 |
| Tumor Morphology                                     | colony formation | colony formation of small cell lung cancer cells     | 2.77E-02 | CAV1                       | 1 |
| Tumor Morphology                                     | invasion         | invasion of nasopharyngeal carcinoma cells           | 2.77E-02 | GNA12                      | 1 |
| Tumor Morphology                                     | quantity         | quantity of carcinoma cells                          | 2.77E-02 | FOXO3                      | 1 |
| Tumor Morphology                                     | stimulation      | stimulation of chronic lymphocytic leukemia cells    | 2.77E-02 | TXLNA                      | 1 |
| Tumor Morphology                                     | proliferation    | proliferation of lung cancer cells                   | 3.57E-02 | CAV1, SKP2                 | 2 |
| Renal and Urological System Development and Function | binding          | binding of kidney cell lines                         | 2.83E-02 | CAV1, SDC4, SORT1, ST6GAL1 | 4 |
| Hair and Skin Development and Function               | binding          | binding of epithelial cell lines                     | 3.77E-02 | CAV1, SDC4, SORT1          | 3 |
| Hepatic System Development and Function              | proliferation    | proliferation of hepatocytes                         | 4.20E-02 | SKP2, TGFA                 | 2 |
