# Supplementary material for: microRNA-7-5p inhibits melanoma cell proliferation and metastasis by suppressing RelA/NF-κB
Source: PubMed Central journal article supplement (PMC5077967; doi:10.18632/oncotarget.9421), 2016-05-17
Supplement: oncotarget-07-31663-s007.pdf [file oncotarget-07-31663-s007.pdf]

**Supplementary Table S6: Correlations of miR-7 isoforms with expression of the putative miR-7-5p target genes in the TCGA melanoma cohort.**

| <b>Genes</b> | <b>Correlation miR-7-1</b> | <b>p-value miR-7-1</b> | <b>Correlation miR-7-2</b> | <b>p-value miR-7-2</b> | <b>Correlation miR-7-3</b> | <b>p-value miR-7-3</b> |
|--------------|----------------------------|------------------------|----------------------------|------------------------|----------------------------|------------------------|
| RELA         | -0.12                      | 0.013                  | -0.08                      | 0.091                  | -0.09                      | 0.068                  |
| IRS2         | -0.22                      | 4x10 <sup>-6</sup>     | 0.02                       | 0.720                  | -0.10                      | 0.039                  |
| POLE4        | 0.15                       | 0.001                  | -0.03                      | 0.591                  | 0.09                       | 0.059                  |
| PAK1         | 0.15                       | 0.002                  | 0.01                       | 0.863                  | 0.05                       | 0.258                  |
| STMN3        | -0.09                      | 0.054                  | 0.01                       | 0.776                  | -0.02                      | 0.672                  |
| SP1          | 0.04                       | 0.453                  | -0.08                      | 0.084                  | -0.09                      | 0.061                  |
| TGFA         | -0.03                      | 0.559                  | 0.02                       | 0.696                  | 0.02                       | 0.628                  |
| RAF1         | 0.03                       | 0.492                  | 0.01                       | 0.846                  | 0.03                       | 0.488                  |
| CTSK         | -0.08                      | 0.084                  | -0.04                      | 0.431                  | -0.02                      | 0.618                  |
| SMO          | -0.13                      | 0.006                  | 0.11                       | 0.017                  | 0.04                       | 0.408                  |

Correlates were calculated using Pearson's correlation coefficient. n=452.
