# Supplementary material for: microRNA-7-5p inhibits melanoma cell proliferation and metastasis by suppressing RelA/NF-κB
Source: PubMed Central journal article supplement (PMC5077967; doi:10.18632/oncotarget.9421), 2016-05-17
Supplement: oncotarget-07-31663-s008.pdf [file oncotarget-07-31663-s008.pdf]

Supplementary Table S7: Genes up or downregulated in response to miR-7-5p overexpression in PCR profiler array.

| Gene          | PCR Array | WM266-4 RT-qPCR |                  |         | 1205Lu RT-qPCR |                  |         |
|---------------|-----------|-----------------|------------------|---------|----------------|------------------|---------|
|               | FC        | FC              | 95% CI           | p-value | FC             | 95% CI           | p-value |
| TNFSF10       | -56.2801  |                 |                  |         |                |                  |         |
| <b>BCL2A1</b> | -7.4361   | -1.515          | -1.616 to -1.413 | <0.0005 | 1.169          | 0.903 to 1.436   | 0.2275  |
| TLR3          | -6.1669   |                 |                  |         |                |                  |         |
| <b>ELK1</b>   | -5.4436   | -4.680          | -4.996 to -4.364 | <0.0005 | -2.328         | -2.837 to -1.819 | <0.0005 |
| PSIP1         | -3.9849   |                 |                  |         |                |                  |         |
| <b>IL1R1</b>  | -3.7181   | -1.971          | -2.205 to -1.737 | <0.0005 | -1.568         | -2.009 to -1.127 | 0.03    |
| <b>CASP1</b>  | -3.2819   | -4.244          | -5.302 to -3.186 | <0.0005 | -2.916         | -4.373 to -1.459 | <0.0005 |
| <b>CXCL2</b>  | -3.0410   | -4.660          | -6.583 to -2.736 | <0.0005 | -1.363         | -1.595 to -1.131 | 0.009   |
| <b>BIRC3</b>  | -3.0200   | -2.437          | -3.487 to -1.386 | <0.0005 | -1.591         | -2.093 to -1.089 | 0.009   |
| <b>CSF1</b>   | -2.8571   | -5.262          | -7.108 to -3.417 | <0.0005 | -3.165         | -4.318 to -2.011 | <0.0005 |
| <b>RELA</b>   | -2.6474   | -2.739          | -3.516 to -1.963 | <0.0005 | -2.814         | -3.557 to -2.070 | <0.0005 |
| <b>IL1B</b>   | -2.6291   | -2.128          | -2.853 to -1.404 | <0.0005 | -2.659         | -4.418 to -0.901 | 0.001   |
| MALT1         | -2.4192   |                 |                  |         |                |                  |         |
| <b>RELB</b>   | -2.3859   | -2.352          | -2.730 to -1.974 | <0.0005 | -2.381         | -2.910 to -1.852 | <0.0005 |
| <b>REL</b>    | -2.3368   | -1.426          | -1.588 to -1.265 | <0.0005 | -1.457         | -1.806 to -1.107 | 0.012   |
| <b>IL1A</b>   | -2.0485   | -3.091          | -3.706 to -2.475 | <0.0005 | -1.547         | -1.895 to -1.198 | <0.0005 |
| <b>IL-6</b>   | -         | -3.861          | -6.107 to -1.615 | <0.0005 | -2.300         | -3.299 to -1.301 | 0.0015  |
| <b>IL-8</b>   | 1.3807    | -2.039          | -2.488 to -1.591 | <0.0005 | -2.907         | -4.721 to -1.092 | <0.0005 |

Bold genes further validated by RT-qPCR.
