# Supplementary material for: microRNA-7-5p inhibits melanoma cell proliferation and metastasis by suppressing RelA/NF-κB
Source: PubMed Central journal article supplement (PMC5077967; doi:10.18632/oncotarget.9421), 2016-05-17
Supplement: oncotarget-07-31663-s009.pdf [file oncotarget-07-31663-s009.pdf]

**Supplementary Table S8: Sequences of primers used for RT-qPCR**

| Gene   | Sequence                                                                                           | PrimerBank ID |
|--------|----------------------------------------------------------------------------------------------------|---------------|
| RELA   | Forward: 5'- CCC ACG AGC TTG TAG GAA AGG -3'<br>Reverse: 5'- GGA TTC CCA GGT TCT GGA AAC -3'       | 223468680c2   |
| CTSK   | Forward: 5'- ACT CAA AGT ACC CCT GTC TCA T -3'<br>Reverse: 5'- CCA CAG AGC TAA AAG CCC AAC -3'     | 315075295c2   |
| POLE4  | Forward: 5'- AGA GGG GTG AAC TGA AGG CT -3'<br>Reverse: 5'- TGG ATG AAT TTG CTT TTC TGG -3'        | N/A           |
| RAF1   | Forward: 5'- CCC AGC ACT ACC TTC TTT GAC -3'<br>Reverse: 5'- AGG GAA CCT TCA GAT GAG GGA -3'       | N/A           |
| SMO    | Forward: 5'- TCG AAT CGC TAC CCT GCT G -3'<br>Reverse: 5'- CAA GCC TCA TGG TGC CAT CT -3'          | 300116182c2   |
| STMN3  | Forward: 5'- CCA GCA CCA TTT CCG CCT A -3'<br>Reverse: 5'- TGC GGC TGT GTG TAG AAG C -3'           | 14670374c1    |
| TGFA   | Forward: 5'- GGC CCT GGC TGT CCT TAT C -3'<br>Reverse: 5'- AGC AAG CGG TTC TTC CCT TC -3'          | N/A           |
| SP1    | Forward: 5'- AGT TCC AGA CCG TTG ATG GG -3'<br>Reverse: 5'- GTT TGC ACC TGG TAT GAT CTG T -3'      | 352962148c2   |
| PAK1   | Forward: 5'- AGG GGA GTT TAC GGG AAT GC -3'<br>Reverse: 5'- TCT TCT GCT CCG ACT TAG TGA TA -3'     | 190886455c2   |
| BCL2A1 | Forward: 5'- TAC AGG CTG GCT CAG GAC TAT -3'<br>Reverse: 5'- CGC AAC ATT TTG TAG CAC TCT G -3'     | 168480070c1   |
| ELK1   | Forward: 5'- TCC TAC GCA TAC ATT GAC CC -3'<br>Reverse: 5'- ACT GGA TGG AAA CTG GAA GG -3'         | N/A           |
| IL1A   | Forward: 5'- AGA TGC CTG AGA TAC CCA AAA CC -3'<br>Reverse: 5'- CCA AGC ACA CCC AGT AGT CT -3'     | 27894329c2    |
| IL1B   | Forward: 5'- ATG ATG GCT TAT TAC AGT GGC AA -3'<br>Reverse: 5'- GTC GGA GAT TCG TAG CTG GA -3'     | 27894305c1    |
| IL1R1  | Forward: 5'- GGC TGA AAA GCA TAG AGG GAA C -3'<br>Reverse: 5'- CTG GGC TCA CAA TCA CAG G -3'       | 27894331c2    |
| CASP1  | Forward: 5'- GCC TGC CGT GGT GAT AAT GT -3'<br>Reverse: 5'- CCT CCA CAT CAC AGG AAC AGG -3'        | N/A           |
| CXCL2  | Forward: 5'- TCA CAG TGT GTG GTC AAC ATT TC -3'<br>Reverse: 5'- TCT CTG CTC TAA CAC AGA GGG A -3'  | N/A           |
| BIRC3  | Forward: 5'- TTT CCG TGG CTC TTA TTC AAA CT -3'<br>Reverse: 5'- GCA CAG TGG TAG GAA CTT CTC AT -3' | 342307084c2   |
| CSF1   | Forward: 5'- TGG CGA GCA GGA GTA TCA C -3'<br>Reverse: 5'- AGG TCT CCA TCT GAC TGT CAA T -3'       | 166235149c1   |
| RELB   | Forward: 5'- CCA TTG AGC GGA AGA TTC AAC T -3'<br>Reverse: 5'- CTG CTG GTC CCG ATA TGA GG -3'      | 317595683c2   |
| REL    | Forward: 5'- CAA CCG AAC ATA CCC TTC TAT CC -3'<br>Reverse: 5'- TCT GCT TCA TAG TAG CCG TCT -3'    | 56550118c2    |
| ICAM1  | Forward: 5'- ATG CCC AGA CAT CTG TGT CC -3'<br>Reverse: 5'- GGG GTC TCT ATG CCC AAC AA -3'         | 167466197c1   |
| HPRT1  | Forward: 5'- ACG AGC CCT CAG GCG AAC CT -3'<br>Reverse: 5'- AAT CAC GAC GCC AGG GCT GC -3'         | N/A           |

|       |                                                                                              |     |
|-------|----------------------------------------------------------------------------------------------|-----|
| GAPDH | Forward: 5'- GGG GTC ATT GAT GGC AAC AAT A -3'<br>Reverse: 5'- ATG GGG AAG GTG AAG GTC G -3' | N/A |
|-------|----------------------------------------------------------------------------------------------|-----|
